# Supplementary material for: Peptide-based quorum sensing systems in Paenibacillus polymyxa
Source: PubMed Central journal article supplement (PMC7425212; doi:10.26508/lsa.202000847), 2020-08-06
Supplement: LSA-2020-00847_Supplemental_Data_1.pdf [file LSA-2020-00847_Supplemental_Data_1.pdf]

## TPRpred analysis results for ALoR receptors

### Supplementary data 1

#### Peptide-based quorum sensing systems in *Paenibacillus polymyxa*

Maya Voichek, Sandra Maaß, Tobias Kroniger, Dörte Becher, Rotem Sorek

---

#### > PPTDRAFT\_00471\_AloR1

MKHTPTIRAELDRYLQQEGMSLTQFGHVAGMNRGIVSAIVTGNKSMQSVNQLDLITEAMGLPEGHFYDLFIENYIIDHPPNMRRIEPLLFRC  
AELDKLEAIRRVVGAIMDNLLYSPKLFIEAEELLSQERHAAAALLLYEGVAEAEKYQHSERLAVCQYRIFTIQVGDDQSRNHKAAILFEPYVERL  
DDLEQLDALKDLANVYRSLRKWDKVDIARVMRAKAEIQYNWKHQKQNKERNEAAKLSRPMFVYITYADLLCASVCDARGDYQQALQ  
YTYAYADLDWVRETDDDTLYWVEMYQDWARCNIIYVNKLLSGDVSLSDYVEYIAETADTMEGEKLSKLLNVMIAANQYNLDVDDVLSRF  
KKDIDAFTQLPTSTDMYSQQVVPDYIAWFGYELAYYYLNRERYSDGFKQLLFAMVKSHIINNETYFINCIGLFMRQVYATPEIKTEFSNLIEK  
VWVGNVEKNRTVNCCE

The sequence name: **PPTDRAFT\_00471\_AloR1**

Per-protein P-value for being TPR: **4.6E-03**

Probability for being TPR: **0.02%**

Per-protein P-value for being SEL1: **5.6E-02**

Probability for being SEL1: **0.00%**

| Repeat | Begin | Alignment                               | End | P-value |
|--------|-------|-----------------------------------------|-----|---------|
| TPR    | 114   | --SPKLFETAEELLSQERHAAAALLLYEGVAEAEKYQ-- | 147 | 2.7e-03 |
| TPR    | 191   | --LDALKDLANVYRSLRKWDKVDIARVMRAKAEIQ--   | 224 | 1.2e-03 |

---

#### >PPTDRAFT\_00474\_AloR2

RAAAVFEAFVERLDEIDQLDALKDLANVYRSLRKWDKVDMAKKMRAKAEIQYTLKHQQNSREHTEFTDKLSRPLFVYISYADLLCASVCEA  
QDDYQQALDYTYTYANLDWVMETDEDTRHWISLFSKSWAEGNTYVYKLLSGDINVLHDYVEYIVATSATNENEKISKLLNVIIAANQYSIDV  
DDILKRFESEINSFSEHPLSDDMYTQQVIPDYIAWFGYELAYYYLHRGSYNDGFKHLMYSMVSYHILNNETYFINCMGLFSHFREYASHETKA  
SFLNLIKVVMTNVEKNGTADHCG

The sequence name: **PPTDRAFT\_00474\_AloR2**

Per-protein P-value for being TPR: **7.0E-03**

Probability for being TPR: **0.01%**

| Repeat | Begin | Alignment                             | End | P-value |
|--------|-------|---------------------------------------|-----|---------|
| TPR    | 19    | --LDALKDLANVYRSLRKWDKVDMAKKMRAKAEIQ-- | 52  | 7.0e-03 |

---

#### >PPTDRAFT\_01046\_AloR3

MEITPTIQAEVQTYLKRKSLTMEFGHTIDLNVGTVSGIVTGNRSMSVHQLDSITAGMNLPPDYFYERYIEECIEECPNLWKKISPFLYRCIEL  
GRLDCLQRVVILLDNPNYLPSLFEVAENVYQDGYNEAAAYLYKVAESEKQQHSERLAICQYRLFQIKVGGQDRAVNLQAAIEFAPFVDRDL  
EIEQLDALKDLANVYRSLSMWDKVEFAHQMGQLGQLQYHLVHNSKRKGTEPRKLSRPLFVYIVYAEELLCANACDAKGNHDDQALEHIRG  
YADLNWVKEQSDSTLYWKRKYQQWAKINTYVNRMLMSGDISVLPDYVEHIAAEEKILAELLNVLEVANRYNVDVDHILRRFESQIAAYQESP  
SSDMYTQQVLTTEEYVRFWYKIAKYSLNKGRYTYGFKLLIAFEKAVTINHVLIIANCFGLFLHFKTNAAPKTQAQFHSIYEEVWEKNDQKDG  
FLLGGN

The sequence name: PPTDRAFT\_01046\_AloR3

Per-protein P-value for being TPR: 2.9E-05

Probability for being TPR: 1.19%

| Repeat | Begin | Alignment                                                                                                                                                                              | End | P-value |
|--------|-------|----------------------------------------------------------------------------------------------------------------------------------------------------------------------------------------|-----|---------|
| TPR    | 114   | --LPSLF <sub>114</sub> EVAEN <sub>115</sub> VYQ <sub>116</sub> DGYNEAAAYLY <sub>117</sub> KKVAE <sub>118</sub> SEK <sub>119</sub> Q <sub>120</sub> --                                  | 147 | 6.2e-03 |
| TPR    | 149   | --SERLA <sub>149</sub> ICQ <sub>150</sub> YRLF <sub>151</sub> QIK <sub>152</sub> VGQ <sub>153</sub> DRAV <sub>154</sub> NLQAAIE <sub>155</sub> FAP <sub>156</sub> FFV--                | 182 | 1.5e-01 |
| TPR    | 191   | --LDAL <sub>191</sub> KDLAN <sub>192</sub> VYRSL <sub>193</sub> SMWD <sub>194</sub> KVYEF <sub>195</sub> AHQMG <sub>196</sub> QLG <sub>197</sub> LQ <sub>198</sub> LQ--                | 224 | 4.0e-04 |
| TPR    | 340   | --EVAN <sub>340</sub> RYNV <sub>341</sub> DVDH <sub>342</sub> ILRR <sub>343</sub> FESQ <sub>344</sub> IAAY <sub>345</sub> QES <sub>346</sub> PSS <sub>347</sub> DMYT--                 | 373 | 4.4e-02 |
| TPR    | 382   | --VRF <sub>382</sub> WYK <sub>383</sub> IAK <sub>384</sub> YSL <sub>385</sub> NKGR <sub>386</sub> YTYG <sub>387</sub> FKCL <sub>388</sub> LIA <sub>389</sub> FEK <sub>390</sub> AVTI-- | 415 | 3.8e-04 |

---

>PPTDRAFT\_01711\_AloR4

LYNTTTTILTEIAKHMRDHD<sub>114</sub>LILSD<sub>115</sub>LARAAEM<sub>116</sub>NPGT<sub>117</sub>MSSII<sub>118</sub>NGN<sub>119</sub>RTL<sub>120</sub>SVD<sub>121</sub>QLDR<sub>122</sub>ITQAM<sub>123</sub>GYPV<sub>124</sub>GY<sub>125</sub>YERY<sub>126</sub>VSEY<sub>127</sub>LAEAN<sub>128</sub>PNW<sub>129</sub>RRM<sub>130</sub>SPFI<sub>131</sub>HN  
CARLNK<sub>132</sub>LDCI<sub>133</sub>HVVN<sub>134</sub>LLMD<sub>135</sub>KLGYS<sub>136</sub>ESL<sub>137</sub>FELAE<sub>138</sub>EEL<sub>139</sub>FHEK<sub>140</sub>MYQA<sub>141</sub>ATILY<sub>142</sub>ENVAI<sub>143</sub>SEK<sub>144</sub>KQY<sub>145</sub>SERL<sub>146</sub>AMC<sub>147</sub>QYR<sub>148</sub>LFH<sub>149</sub>TRQ<sub>150</sub>GD<sub>151</sub>NQEK<sub>152</sub>NYEAA<sub>153</sub>VQF<sub>154</sub>EIY<sub>155</sub>V  
DRLDEI<sub>156</sub>EQLD<sub>157</sub>ALKDL<sub>158</sub>ANTY<sub>159</sub>RS<sub>160</sub>LRK<sub>161</sub>W<sub>162</sub>DKV<sub>163</sub>ELFA<sub>164</sub>KALG<sub>165</sub>DKAKI<sub>166</sub>QYK<sub>167</sub>LEQ<sub>168</sub>ERH<sub>169</sub>PSK<sub>170</sub>KEN<sub>171</sub>AKK<sub>172</sub>PS<sub>173</sub>PLF<sub>174</sub>AYW<sub>175</sub>AFS<sub>176</sub>HLL<sub>177</sub>RAE<sub>178</sub>VCEA<sub>179</sub>HKDY<sub>180</sub>EKAL<sub>181</sub>QHT  
YKYGD<sub>182</sub>LSW<sub>183</sub>VKET<sub>184</sub>DDTT<sub>185</sub>LK<sub>186</sub>WR<sub>187</sub>QYEE<sub>188</sub>WAV<sub>189</sub>GNTY<sub>190</sub>LNK<sub>191</sub>ILAGE<sub>192</sub>ICV<sub>193</sub>LS<sub>194</sub>VDY<sub>195</sub>LVY<sub>196</sub>ISS<sub>197</sub>RKDE<sub>198</sub>ILP<sub>199</sub>ALDI<sub>200</sub>IVD<sub>201</sub>SAN<sub>202</sub>RYH<sub>203</sub>FD<sub>204</sub>VD<sub>205</sub>VIL<sub>206</sub>KQF<sub>207</sub>EGE<sub>208</sub>ISS<sub>209</sub>LLE<sub>210</sub>Q<sub>211</sub>  
KIESF<sub>212</sub>YTKR<sub>213</sub>FITER<sub>214</sub>FMH<sub>215</sub>FSK<sub>216</sub>ELSI<sub>217</sub>YLT<sub>218</sub>KKR<sub>219</sub>YSD<sub>220</sub>GFK<sub>221</sub>LISC<sub>222</sub>LEK<sub>223</sub>STL<sub>224</sub>INN<sub>225</sub>KSYI<sub>226</sub>IKC<sub>227</sub>MK<sub>228</sub>LYE<sub>229</sub>SYRE<sub>230</sub>YAS<sub>231</sub>FD<sub>232</sub>VKT<sub>233</sub>AYR<sub>234</sub>KLINE<sub>235</sub>VD<sub>236</sub>QDEA

The sequence name: PPTDRAFT\_01711\_AloR4

Per-protein P-value for being TPR: 7.9E-06

Probability for being TPR: 3.04%

Per-protein P-value for being SEL1: 8.1E-02

Probability for being SEL1: 0.00%

| Repeat | Begin | Alignment                                                                                                                                                                                                                | End | P-value |
|--------|-------|--------------------------------------------------------------------------------------------------------------------------------------------------------------------------------------------------------------------------|-----|---------|
| TPR    | 3     | --NTTTT <sub>3</sub> ILTEI <sub>4</sub> AKHMRD <sub>5</sub> HD <sub>6</sub> LILSD <sub>7</sub> LARAAEM <sub>8</sub> NPGT--                                                                                               | 36  | 9.7e-03 |
| TPR    | 115   | --SESL <sub>115</sub> FELAE <sub>116</sub> EEL <sub>117</sub> FHEK <sub>118</sub> MYQA <sub>119</sub> ATILY <sub>120</sub> ENVAI <sub>121</sub> SEK <sub>122</sub> KQ--                                                  | 148 | 1.7e-04 |
| SEL1   | 154   | --AMC <sub>154</sub> QYR <sub>155</sub> LFH <sub>156</sub> TRQ <sub>157</sub> GD <sub>158</sub> NQEK <sub>159</sub> NYEAA <sub>160</sub> VQF <sub>161</sub> EIY <sub>162</sub> VD <sub>163</sub> R <sub>164</sub> LDEI-- | 189 | 3.9e-03 |
| TPR    | 192   | --LDAL <sub>192</sub> KDLAN <sub>193</sub> TYR <sub>194</sub> SLR <sub>195</sub> KKW <sub>196</sub> DKV <sub>197</sub> ELFA <sub>198</sub> KALG <sub>199</sub> DKAKI <sub>200</sub> Q--                                  | 225 | 4.1e-03 |

---

>PPTDRAFT\_01713\_AloR5

MEIIPTIRAEVQTYLIRKSL<sub>114</sub>TMTE<sub>115</sub>FGHI<sub>116</sub>IDL<sub>117</sub>NVGT<sub>118</sub>VS<sub>119</sub>GIVT<sub>120</sub>GNR<sub>121</sub>PIS<sub>122</sub>VH<sub>123</sub>QLDR<sub>124</sub>ITM<sub>125</sub>GMN<sub>126</sub>LPP<sub>127</sub>DYF<sub>128</sub>ERY<sub>129</sub>IDEC<sub>130</sub>IEE<sub>131</sub>PLN<sub>132</sub>WRR<sub>133</sub>ISP<sub>134</sub>FLY<sub>135</sub>RC<sub>136</sub>VV<sub>137</sub>LG  
RLDCL<sub>138</sub>RRV<sub>139</sub>VGM<sub>140</sub>LLDN<sub>141</sub>PVY<sub>142</sub>LPSL<sub>143</sub>FVAE<sub>144</sub>DSF<sub>145</sub>KKGN<sub>146</sub>TEAA<sub>147</sub>FLY<sub>148</sub>ENV<sub>149</sub>SEGE<sub>150</sub>KYQ<sub>151</sub>SERL<sub>152</sub>AVC<sub>153</sub>QYR<sub>154</sub>LFT<sub>155</sub>IRIG<sub>156</sub>DD<sub>157</sub>QEK<sub>158</sub>NYDAA<sub>159</sub>IQF<sub>160</sub>EPY<sub>161</sub>VD<sub>162</sub>R<sub>163</sub>LDEI  
DQLEA<sub>164</sub>LKDL<sub>165</sub>ANTY<sub>166</sub>RS<sub>167</sub>LRK<sub>168</sub>W<sub>169</sub>DKV<sub>170</sub>ELFA<sub>171</sub>KAMG<sub>172</sub>DKAKI<sub>173</sub>QYK<sub>174</sub>LQ<sub>175</sub>QR<sub>176</sub>HH<sub>177</sub>VHK<sub>178</sub>DNS<sub>179</sub>KK<sub>180</sub>PN<sub>181</sub>FL<sub>182</sub>FAY<sub>183</sub>WAF<sub>184</sub>S<sub>185</sub>HLL<sub>186</sub>RSQ<sub>187</sub>AC<sub>188</sub>GER<sub>189</sub>KDY<sub>190</sub>EKGL<sub>191</sub>QH<sub>192</sub>HI<sub>193</sub>KY  
ADLSW<sub>194</sub>VTDT<sub>195</sub>DEE<sub>196</sub>ALK<sub>197</sub>WR<sub>198</sub>KKY<sub>199</sub>EDW<sub>200</sub>AVV<sub>201</sub>NTY<sub>202</sub>VN<sub>203</sub>KL<sub>204</sub>SG<sub>205</sub>DES<sub>206</sub>VLS<sub>207</sub>DY<sub>208</sub>VAY<sub>209</sub>ISAR<sub>210</sub>KDEI<sub>211</sub>LPAL<sub>212</sub>DIM<sub>213</sub>IEA<sub>214</sub>AN<sub>215</sub>RYH<sub>216</sub>FD<sub>217</sub>VD<sub>218</sub>NIL<sub>219</sub>KQF<sub>220</sub>EEI<sub>221</sub>S<sub>222</sub>FLE<sub>223</sub>Q<sub>224</sub>KKV  
EGLY<sub>225</sub>TQR<sub>226</sub>FTT<sub>227</sub>ERY<sub>228</sub>TH<sub>229</sub>FARE<sub>230</sub>LAI<sub>231</sub>YLL<sub>232</sub>RK<sub>233</sub>GK<sub>234</sub>FS<sub>235</sub>DG<sub>236</sub>FT<sub>237</sub>FL<sub>238</sub>SC<sub>239</sub>LEK<sub>240</sub>SAE<sub>241</sub>ANN<sub>242</sub>R<sub>243</sub>IQAI<sub>244</sub>RC<sub>245</sub>MRL<sub>246</sub>F<sub>247</sub>TH<sub>248</sub>FKE<sub>249</sub>HAS<sub>250</sub>AH<sub>251</sub>TRAV<sub>252</sub>YG<sub>253</sub>KL<sub>254</sub>IKAV<sub>255</sub>NE<sub>256</sub>DEE

The sequence name: PPTDRAFT\_01713\_AloR5

Per-protein P-value for being TPR: 5.4E-05

Probability for being TPR: 0.74%

Per-protein P-value for being SEL1: 3.9E-02

Probability for being SEL1: 0.00%

| Repeat | Begin | Alignment                                                                                                                                                                                                              | End | P-value |
|--------|-------|------------------------------------------------------------------------------------------------------------------------------------------------------------------------------------------------------------------------|-----|---------|
| TPR    | 114   | --LPSL <sub>114</sub> FVAE <sub>115</sub> DSF <sub>116</sub> KKGN <sub>117</sub> TEAA <sub>118</sub> FLY <sub>119</sub> ENV <sub>120</sub> SEGE <sub>121</sub> KYQ--                                                   | 147 | 1.8e-03 |
| TPR    | 191   | --LEA <sub>191</sub> LKDL <sub>192</sub> ANTY <sub>193</sub> RS <sub>194</sub> LRK <sub>195</sub> W <sub>196</sub> DKV <sub>197</sub> ELFA <sub>198</sub> KAMG <sub>199</sub> DKAKI <sub>200</sub> Q--                 | 224 | 3.6e-03 |
| TPR    | 251   | --AFS <sub>251</sub> HLL <sub>252</sub> RSQ <sub>253</sub> AC <sub>254</sub> GER <sub>255</sub> KDY <sub>256</sub> EKGL <sub>257</sub> QH <sub>258</sub> IK <sub>259</sub> KYAD <sub>260</sub> LSW <sub>261</sub> VT-- | 284 | 8.6e-03 |

---

>PPTDRAFT\_01722\_AloR6

MKITPTIRAELEQYLKQEGLTLSQFGQITGMNIRGISSIVTGNKSMSINQLDRITEAMGLPEGHFYDLFIENYIIDHPPNMRRIEPFLYRCAELE  
KLDAIRRVVGAIMDNLLYSPKLFIEAEGLLAQGRLEAALILYEGVAEAEKYQHSERLAICQYRLFQIKIGNDQEKNFQSALQFEPFVKRLDAID  
QLDALIDLANVYRSLRKWERVKEIAKDLRTLAKAQYSLEYSQKRGECKPQRPLFFYIAFSKSLIGGVYEEQKYELALQIAYESCDLDWVKETD  
EEALRWKSLFQEWGEANICLTKLMAGDTEVLPYIDLSTNREELLPLWNIMIVANRYKLNVDLSILSQFEWEISNIHDQEGRQTNDKQININ  
DQLVGFSEADYYLTNGQYKKGISYLLDCMRISTIINNERSILRCVRFERCRQFVTDEAKVEYRNLVEMG

The sequence name: **PPTDRAFT\_01722\_AloR6**

Per-protein P-value for being TPR: **2.8E-11**

Probability for being TPR: **99.48%**

Per-protein P-value for being SEL1: **1.1E-02**

Probability for being SEL1: **0.01%**

| Repeat | Begin | Alignment                              | End | P-value |
|--------|-------|----------------------------------------|-----|---------|
| TPR    | 114   | --SPKLFIEAEGLLAQGRLEAALILYEGVAEAEKYQ-- | 147 | 2.6e-04 |
| TPR    | 191   | --LDALIDLANVYRSLRKWERVKEIAKDLRTLAKAQ-- | 224 | 1.4e-04 |
| SEL1   | 222   | -KAQYSLEYSQKRGECKPQRPLFFYIAFSKSLIGGVY- | 257 | 8.5e-03 |
| TPR    | 247   | --AFSKSLIGGVYEEQKYELALQIAYESCDLDWVK--  | 280 | 1.1e-03 |
| SEL1   | 264   | -ELALQIAYESCDLDWVKETDEEALRWKSLFQEWGEA- | 299 | 9.7e-04 |
| TPR    | 379   | --VGFLSELADYYLTNGQYKKGISYLLDCMRISTII-- | 412 | 1.0e-03 |

---

>PPTDRAFT\_02243\_AloR7

VDDLHSDITDLDTLVNMIKLSFSFMDGTHMIALCDQLYYHVNQKYQEWQLYKAFKKPIQPIHTKRPLVYYYGYSHLMKGMMAFQKQGKYE  
AARDICIEKYAELGWFNGLDPYGEAEVDYRHAARANLYALDILSGRSEMQLQEYVQFLRDNPEELLPGLLSIVEGATRHDYPLERVLESFAEQI  
EDFKYFEFPVNVSYFRFCYQLALYYIKLRQFRVALGYILQSLKLSDTLGMEHEHEFRKCTAIFEIFRSQATATQQDQYITILKGVKDEKIDFTP  
VVAQSV

The sequence name: **PPTDRAFT\_02243\_AloR7**

Per-protein P-value for being TPR: **1.8E-10**

Probability for being TPR: **98.46%**

| Repeat | Begin | Alignment                                 | End | P-value |
|--------|-------|-------------------------------------------|-----|---------|
| TPR    | 73    | --GYSHLMKGMMAFQKQGKYEAAARDICIEKYAELGWFN-- | 106 | 1.7e-06 |
| TPR    | 199   | --FRFCYQLALYYIKLRQFRVALGYILQSLKLSDTL--    | 232 | 1.2e-04 |

---

>PPTDRAFT\_02798\_AloR8

MKHTPTIRAEADRYLKQEGLNLTQFGHIAGINRGIVSGIVTGNSSMSVNIQDRITEAMGLPEGYFYDLYVENYIIDIPPNMRRIEPFLYRCAEL  
DKLDAIRRVVGAIMDNLLYSPKLFDAIEELLAQERHDAALLLYESVAEVEKYQHSERLAICQYRIFTIQIDDDQSRNLRAAILFEPYVERLDEIEQ  
LDALEDLANVYRSLRKWDKVDEIARKMRAKAEIQYTLKHQQSSRERTESTKKLTRPMPFVYITYADLLCASVCEARGDYQQALQYTYAYTDLD  
WVKETDEDQYWISLQHWAEAGNAYVNLMSGNTSVLLDFVEYIGTTANESEKLSKLLNIIIVANRYNLDIDGVLTKFKIDIDASTQLPTSTD  
MYTQQVVPDYIALFCYEMAYYNLNRKKYSDGFKQLLSAMVKAHILNNETYFINCTGLFAHFQAYASPETREEYFKLLEKVWLDNVEKNGTV  
NRCE

The sequence name: PPTDRAFT\_02798\_AloR8

Per-protein P-value for being TPR: 1.5E-04

Probability for being TPR: 0.34%

Per-protein P-value for being SEL1: 3.8E-02

Probability for being SEL1: 0.00%

| Repeat | Begin | Alignment                                                                                                                           | End | P-value |
|--------|-------|-------------------------------------------------------------------------------------------------------------------------------------|-----|---------|
| TPR    | 114   | --SPKLF <sup>D</sup> IAE <sup>E</sup> LLAQ <sup>R</sup> HDAA <sup>L</sup> LLY <sup>E</sup> SVAE <sup>V</sup> EKYQ--                 | 147 | 3.0e-04 |
| TPR    | 191   | --LDA <sup>L</sup> EDLAN <sup>V</sup> YRSL <sup>R</sup> KK <sup>W</sup> DK <sup>V</sup> DEI <sup>A</sup> ARK <sup>M</sup> RAKAEIQ-- | 224 | 3.2e-04 |

---

>PPTDRAFT\_02818\_AloR9

MKHTPTIRAELDRYLQQEGLSMTEFGHIAGMNRGAVSAIVSGNKSMSVNQLDLITEAMGLPEGHFYDLFIENYIIDHPPNMRRIEPFLFRC  
AELDKLDAIRRVVGAIMDNLLYSPKLF<sup>E</sup>IAE<sup>E</sup>LLVQGR<sup>H</sup>KAALL<sup>L</sup>YEG<sup>V</sup>AE<sup>A</sup>ERYQH<sup>S</sup>ERLAV<sup>C</sup>QYRIFTIQIGDDQSQNV<sup>R</sup>VAAVFEAF<sup>V</sup>ER  
LDEIEQLDALKDLAN<sup>V</sup>YRSL<sup>R</sup>KK<sup>W</sup>DK<sup>V</sup>DEMAR<sup>Q</sup>MRAKAVIQ<sup>S</sup>VFHNE<sup>Q</sup>HKDGTLEK<sup>K</sup>TRG<sup>P</sup>LF<sup>G</sup>YIAYADLLCAS<sup>V</sup>CEARGDYQQALQ<sup>Y</sup>T  
YAYADLDWVKEDDEDTKHWMN<sup>L</sup>FSQWAEGNTY<sup>V</sup>YKLLSGDIN<sup>V</sup>LHDYVEYIVATSETNENEKIS<sup>K</sup>LLNVIIAANQ<sup>S</sup>IDVDDILKRFETLIG<sup>T</sup>  
FSQQLSSDDMYTRQVIPDYIAWFGYELGFYFLHRGKYIDGFKYLMNAMVKSHIINNETYFINCMGLFVRFQAHAVPETKA<sup>E</sup>YFN<sup>L</sup>IERV<sup>W</sup>E  
NNVQKSGTSNHCG

The sequence name: PPTDRAFT\_02818\_AloR9

Per-protein P-value for being TPR: 4.7E-04

Probability for being TPR: 0.13%

Per-protein P-value for being SEL1: 5.1E-02

Probability for being SEL1: 0.00%

| Repeat | Begin | Alignment                                                                                                             | End | P-value |
|--------|-------|-----------------------------------------------------------------------------------------------------------------------|-----|---------|
| TPR    | 114   | --SPKLF <sup>E</sup> IAE <sup>E</sup> LLVQGR <sup>H</sup> KAALL <sup>L</sup> YEG <sup>V</sup> AE <sup>A</sup> ERYQ--  | 147 | 7.3e-04 |
| TPR    | 191   | --LDAL <sup>K</sup> DLAN <sup>V</sup> YRSL <sup>R</sup> KK <sup>W</sup> DK <sup>V</sup> DEMAR <sup>Q</sup> MRAKAVIQ-- | 224 | 4.1e-04 |

---

>PPTDRAFT\_03195\_AloR10

MKITPTIRAELEHFLQQENL<sup>T</sup>LSQFGQITGMN<sup>R</sup>GIISSIVTGN<sup>K</sup>SMSINQLDRITEAMGLPEGHFYDLFIENYIIDTPPNMRRIEPFLFRC<sup>A</sup>E<sup>L</sup>D  
KLD<sup>A</sup>IRRVVGAIMDNLLYSPKLF<sup>E</sup>IAE<sup>E</sup>LLSQGR<sup>H</sup>EAA<sup>L</sup>LILYEG<sup>V</sup>AE<sup>A</sup>ERYQH<sup>S</sup>ERLAV<sup>C</sup>QYRIFTIQVGGDDQSRNIRAAAVFEAF<sup>V</sup>ERLDEID  
QLDALKDLAN<sup>V</sup>YRSL<sup>R</sup>KK<sup>W</sup>DK<sup>V</sup>DEI<sup>A</sup>ARK<sup>M</sup>KQKAKTQYLLKHQ<sup>H</sup>KNRECDEYK<sup>K</sup>LSR<sup>L</sup>PFVYISYADLLCAGVYEAQGDY<sup>N</sup>OALQYTYAYAD<sup>L</sup>  
DWVKETDEDTKHWISL<sup>F</sup>QHW<sup>A</sup>QANVIVN<sup>K</sup>LLSGDMK<sup>V</sup>LN<sup>D</sup>YVEYIAASSD<sup>T</sup>TDQDRVTQLLNIMMTANRYQIDVNDILQRFETDVNS<sup>L</sup>L  
QLPQFNDVY<sup>T</sup>QHV<sup>I</sup>PEQFARLGYELAYYYLHQGT<sup>Y</sup>DDGFKYLMYSLVSYHRLNNETYFIKCLVLFERYRVYAVSETKAAYLEFIERV<sup>W</sup>IA<sup>D</sup>V<sup>K</sup>  
KNGAIDRRN

The sequence name: PPTDRAFT\_03195\_AloR10

Per-protein P-value for being TPR: 5.8E-08

Probability for being TPR: 51.55%

Per-protein P-value for being SEL1: 1.0E-02

Probability for being SEL1: 0.01%

| Repeat | Begin | Alignment                                                                                                                           | End | P-value |
|--------|-------|-------------------------------------------------------------------------------------------------------------------------------------|-----|---------|
| TPR    | 114   | --SPKLF <sup>E</sup> IAE <sup>E</sup> LLSQGR <sup>H</sup> EAA <sup>L</sup> LILYEG <sup>V</sup> AE <sup>A</sup> ERYQ--               | 147 | 9.7e-05 |
| TPR    | 191   | --LDAL <sup>K</sup> DLAN <sup>V</sup> YRSL <sup>R</sup> KK <sup>W</sup> DK <sup>V</sup> DEI <sup>A</sup> ARK <sup>M</sup> KQKAKTQ-- | 224 | 2.4e-05 |
| TPR    | 388   | --ARL <sup>G</sup> YELAYYYLHQGT <sup>Y</sup> DDGFKYLMYSLVSYHRL--                                                                    | 421 | 1.5e-03 |

---

>PPTDRAFT\_04223\_AloR11

LSFIKFAHSKFVLKGFIMENTPTIRAEIVKYLKQKDLTMTTEFGHIIDLNVGTISGIVTGNRSISVHQLDSTMGMNLPDPYFYERFIEECIEDFS  
LNWRKISPFLYRCVELNRLDCVQRVVSMLLDNPAYPPLLFEAENSFQKGYKDTAAYLYEKIAESEKHQHSELAICQYRLFTIGIGEDQIQNL  
QIAARFEPFIDRLDEVDQLDALKDLANLYRALGQWDKVVYFAQMMRERAKLRYGMKQESHKRPSRPPFVYIAYGDLLCAYACDARGNYE  
QGLKHLKAHTDLSWVKEKDSQHWLGLFQGWAKINTYVNRMLMSGDVSVLPDYVEYISGEKEIFAELNNVVEAANRYNLDIDHILDRFESHI  
AAYREPKATDIYTQQVLSDEYARFWYKLAKYKLFGRGEYPYGFKCLMDAFEKSVKINNVLLISNCSGLFERFRVHADPETLAQYQSMFLEVWE  
RNEKKDGLFSS

The sequence name: **PPTDRAFT\_04223\_AloR11**

Per-protein P-value for being TPR: **2.1E-07**

Probability for being TPR: **29.80%**

| Repeat | Begin | Alignment                                                        | End | P-value |
|--------|-------|------------------------------------------------------------------|-----|---------|
| TPR    | 132   | --PPLLFELAE <sup>NS</sup> FQKGYK <sup>DTAAYLYEKIAESEKHQ</sup> -- | 165 | 1.6e-04 |
| TPR    | 167   | --S <sup>ER</sup> L <sup>AICQYRLFTIGIGEDQIQNLQIAARFEPFI</sup> -- | 200 | 1.0e-01 |
| TPR    | 209   | --L <sup>DALKDLANLYRALGQWDKVVYFAQMMRERAKLR</sup> --              | 242 | 9.3e-05 |
| TPR    | 393   | --A <sup>RFWYKLAKYKLFGRGEYPYGFKCLMDAFEKSVKI</sup> --             | 426 | 3.3e-04 |
| TPR    | 435   | --C <sup>SGLFERFRVHADPETLAQYQSMFLEVWERNEK</sup> --               | 468 | 4.5e-02 |

---

>PPTDRAFT\_04756\_AloR12

LEKNTTIRAEIEKYIQSEGISMQCFADASKVNPGLTSGILNRNPPRPISVNQLDLITEAMGLEEGSLFEMYVDECFIHSPLPHWRRLRPFLRCSE  
LNKLDICIRSVLGYLMDLNSVPAIFETA<sup>AMFEDGRHEASMLLYDCVIESEKYT</sup>HSERLAISYFRIFQIQIKDNQRNLKAAVQFHLYRSRLPEIY  
ALEGLHMLSQVFALKMQWSEMEMYADELRELAQALYRNRNRFGEHLELIKPLVYYAQAQHLLKASCYEFQGRYEESKQWIEGYADLSW  
FEGLDDEGWKVVNLHRVYAQGNRLCIEIKMGNTSAIYEYITYLREHPDETLEGLNLTLESANRFGYFVDAEELFNQQLKRIWELAPEQWDT  
HYRKHFNAFRFASFKVYAEYYFRKGDYPKGLGQTLHCLQLSVDNSYTEHIIGCMALFEQHRNFATPEQQQLYQSLCLGVRANEKNHAYD  
HSAGGYL

The sequence name: **PPTDRAFT\_04756\_AloR12**

Per-protein P-value for being TPR: **8.0E-10**

Probability for being TPR: **95.64%**

Per-protein P-value for being SEL1: **4.5E-02**

Probability for being SEL1: **0.00%**

| Repeat | Begin | Alignment                                                        | End | P-value |
|--------|-------|------------------------------------------------------------------|-----|---------|
| TPR    | 116   | --V <sup>PAIFETA</sup> E <sup>AMFEDGRHEASMLLYDCVIESEKYT</sup> -- | 149 | 1.0e-04 |
| TPR    | 192   | --L <sup>EGLHMLSQVFALKMQWSEMEMYADELRELAQAL</sup> --              | 225 | 4.1e-03 |
| TPR    | 248   | --A <sup>QHLLKASCYEFQGRYEESKQWIEGYADLSWFE</sup> --               | 281 | 1.8e-03 |
| TPR    | 383   | --A <sup>SFCKVYAEYYFRKGDYPKGLGQTLHCLQLSVDN</sup> --              | 416 | 1.3e-03 |
| SEL1   | 384   | - <sup>SFCKVYAEYYFRKGDYPKGLGQTLHCLQLSVDNSYT</sup> -              | 419 | 1.1e-03 |

---

>PPTDRAFT\_04976\_AloR13

LENATTIRSEIEKELKGGYTFNSFGQATGLNRGIFSAMLNGNPPKISVRQMDLITKALNYPEDWLYDLYVDECFYDGRPHWKRVPFLIRC  
VEVGNLQCVEKVL<sup>SRLMEDLNHIPTIFALAEELYDGGK</sup>LQEAIPFYECVIENEKYQHSELAISHYKLFRAKIGENTEINLKA<sup>AIQFEPFR</sup>LPE  
CHQLDGLLH<sup>LNTNIYSSLHKWQETITHSDELWEQSKIYEEENKRRARKNRSYVPKTERHLVVY</sup>YGQGLLMKAYALQKIGDYEKAKKIVA<sup>EYA</sup>

DLSWFEGLDTVGKREVEKFKVWSMGNSYTLDLLLGDTSVLPQYVNLLENNDLILPGLVNILESANRNFFSVDSILDQFIKIDTFKTTQDVIF  
MDDYYNFNFLAIYYRRNKRHKDAINAILQCIQTSFFLKNVESFAQSMVFFENLRALCDEVQIEIYKSIKGVCKDEEGFSFTLAFSNESSQ

The sequence name: **PPTDRAFT\_04976\_AloR13**

Per-protein P-value for being TPR: **4.0E-12**

Probability for being TPR: **99.80%**

| Repeat | Begin | Alignment                               | End | P-value |
|--------|-------|-----------------------------------------|-----|---------|
| TPR    | 79    | --GRPHWKRVPFLIRCVGVNLCQVEKVLRLMED--     | 112 | 9.9e-02 |
| TPR    | 116   | --IPTIFALAEELYDGGKLEAIPFYECVINEKYQ--    | 149 | 3.0e-06 |
| TPR    | 151   | --SERLAISHYKLFRAKIGENTEINLKAAIQFEPFR--  | 184 | 1.4e-01 |
| TPR    | 193   | --LDGLLHLTNIYSSLHKWQETITHSDELWEQSKII--  | 226 | 1.5e-04 |
| TPR    | 255   | --GQGLLMKAYALQKIGDYEKAKKIVA EYADLSWFE-- | 288 | 8.3e-03 |
| TPR    | 345   | --ESANRNFFSVDSILDQFIKIDTFKTTQDVIFMD--   | 378 | 7.8e-02 |
| TPR    | 381   | --YNFNFQLAIYYRRNKRHKDAINAILQCIQTSFFL--  | 414 | 5.9e-05 |

>PPTDRAFT\_04977\_AloR14

MEHTPTIRSTIETELKQRGYTFSSFSKISGINRGTFSTMLNSNPPKPISVRQMDLITKALGYPDGWLYELYIDECFHEGKGHWKRIKPFLLRCV  
DLGRKDCIQKVLRLTEDWSYVSTVFEFAEELHKVGGKNEAVPFYECVENERYYHSERLAICQYRLFCYLSNLDLNNRQAAIRFAPFPKNL  
PENYQLDALLKLTNTNFQFYDYDMAIHYAKELEVLVTGIFWDQAQARAKNREVRTLNTERHLIVVYGOAYLMQGNLSLEKQGLYEAMKFI  
PYYENLRIEGLDEVGMIEAEKFEIWGKANRLNLQILMGDKDSLPAVELIRDNPQEILLGLLTIIESANNYSYSVDDTLVLFADINKFRELRT  
NISYYHTNNSLLTYSRFFLELSRYFFSKGSYTEAINNMLISLEASSQLNDKTYIYKISITLLFEKYKDHSTEEQRTEYEKAIKAVEYNTRQMTS

The sequence name: **PPTDRAFT\_04977\_AloR14**

Per-protein P-value for being TPR: **3.2E-08**

Probability for being TPR: **61.74%**

| Repeat | Begin | Alignment                              | End | P-value |
|--------|-------|----------------------------------------|-----|---------|
| TPR    | 116   | --VSTVFEFAEELHKVGGKNEAVPFYECVENERYY--  | 149 | 1.5e-05 |
| TPR    | 157   | --CQYRLFCYLSNSDLNDRQAAIRFAPFPKNLPEN--  | 190 | 2.7e-01 |
| TPR    | 193   | --LDALLKLTNTNFQFYDYDMAIHYAKELEVLVTGI-- | 226 | 1.8e-03 |
| TPR    | 387   | --SRFFLELSRYFFSKGSYTEAINNMLISLEASSQL-- | 420 | 2.8e-05 |
| TPR    | 426   | --YIKSITLLFEKYKDHSTEEQRTEYEKAIKAVEYN-- | 459 | 6.2e-02 |

>PPTDRAFT\_05290\_AloR15

VEEVLNQRGAIYLLSDSHALDKACELFRISYTHNDWDEANKVADYLHSLAESLYHTQLRNAADGKYETLDTKHPLVFFYAYSYLAKSIYYQNI  
GQYEEARDYIMKYSEMGMGLDQSGHEEVERFRFLAKANLYMIDLLSGKALLPEYVQFLHSNDEELLPGLVSITEAANLNNWDIDELLN  
EFADDIEIFEGYEDRANRVYLLKLVNQLAIYYLKKKQYIFALNYILVSLQFSIGVEADADFRTLVALFETYRDLATPSQQEQYQTILLRGLHNEKG  
IKLDNYGLSVS

The sequence name: **PPTDRAFT\_05290\_AloR15**

Per-protein P-value for being TPR: **5.3E-07**

Probability for being TPR: **18.02%**

| Repeat | Begin | Alignment                              | End | P-value |
|--------|-------|----------------------------------------|-----|---------|
| TPR    | 2     | --EEVLNQRGAIYLLSDSHALDKACELFRISYTHND-- | 35  | 2.6e-02 |
| TPR    | 43    | --ADYLHSLAESLYHTQLRNAADGKYETLDTKHPLV-- | 76  | 5.1e-03 |

| Repeat | Begin | Alignment                              | End | P-value |
|--------|-------|----------------------------------------|-----|---------|
| TPR    | 80    | --AYSYLAKSIYYQNIHQYEEARDYIMKYSEMGMWF-- | 113 | 5.2e-05 |
| TPR    | 123   | --VERFRFLAKANLYMIDLLSGKKALLPEYVQFLHS-- | 156 | 5.9e-01 |
| TPR    | 163   | --PGLVSITEAANLNNWDIDELLNEFADDIEIFEGY-- | 196 | 9.5e-02 |
| TPR    | 206   | --LKLNVQLAIYYLKKKQYIFALNYILVSLQFSIGV-- | 239 | 1.6e-03 |

>PPTDRAFT\_05358\_AloR16

LKETTITIRAELEQYIRREGITISKFGENTGINAGTISAIINGNRPIAMLLLDRIAAGMGLEEGSLYELYIDEFIRNTAPNWRRVRPFLHRCAELNK  
LDCIKQVVEFIMDYLIYAPALFETAEEFSEGRLEAAAIYKNVAESEKYQHSERLALCQYRLFTITVGDDQDENLWAATHFESFVERLGEADQ  
LDALRDLANTYASLRRWDKVEWFAEKMAQKAKLQYEQKYGNTRKSERGKEPKGPLFMYIVYSYVLRAGVWDERGDYQKALEYVSLYSDL  
SWVQEDTEEARHLKALCSNWAEANRYLYQLMSGSLDVIPQYVNYLEKNEGEILVGLHKIMVAANRYDFNVDHVLQHFQKQIEAFADQHA  
KVGTYTEQMSADLYARFLAEMACYDLNKHRYSKGMKFLLESLSYSVVLNGNPVTIKCVGLFEKYRHTATSEDKKEYKNLLGEVEYIYDKKDRF  
FSARI

The sequence name: **PPTDRAFT\_05358\_AloR16**

Per-protein P-value for being TPR: **6.2E-08**

Probability for being TPR: **50.32%**

Per-protein P-value for being SEL1: **2.4E-02**

Probability for being SEL1: **0.00%**

| Repeat | Begin | Alignment                              | End | P-value |
|--------|-------|----------------------------------------|-----|---------|
| TPR    | 114   | --APALFETAEEFSEGRLEAAAIYKNVAESEKYQ--   | 147 | 1.1e-04 |
| TPR    | 191   | --LDALRDLANTYASLRRWDKVEWFAEKMAQKAKLQ-- | 224 | 2.4e-04 |
| TPR    | 250   | --VYSYVLRAGVWDERGDYQKALEYVSLYSDLSWVQ-- | 283 | 8.1e-05 |
