# Supplementary material for: Peptide-based quorum sensing systems in Paenibacillus polymyxa
Source: Life Sci Alliance. 2020 Aug 6;3(10):e202000847. doi: 10.26508/lsa.202000847 (PMC7425212; doi:10.26508/lsa.202000847)
Supplement: Supplementary file 7 [file LSA-2020-00847_TableS6.xlsx]

## Sheet: Table S6
Table S6: Differential gene expression analysis at 10 minutes mature AloP13 and scrambled mature AloP13 peptide incubation
			scrambled vs. mature AloP13			Raw reads-per-gene count (input for DESeq2)
gene locus	annotation	baseMean	fold change	p-value	p-adjusted	matP13_repA	matP13_repB	matP13_repC	scrP13_repA	scrP13_repB	scrP13_repC
PPTDRAFT_00001	hypothetical protein	2.8269	1.01402	0.987857	0.999638	2	4	2	3	2	2
PPTDRAFT_00002	hypothetical protein	1343.29	0.978284	0.770713	0.999638	967	1352	2202	1068	911	1941
PPTDRAFT_00003	hypothetical protein	256.004	0.985301	0.898633	0.999638	154	239	533	173	184	417
PPTDRAFT_00004	Inhibitor of sigma-G Gin	45.6106	1.07688	0.756789	0.999638	45	35	60	53	23	66
PPTDRAFT_00005	Arginine/lysine/ornithine decarboxylase	245.142	1.03832	0.746396	0.999638	165	188	540	207	142	453
PPTDRAFT_00006	dTMP kinase	99.4269	1.03411	0.845502	0.999638	73	67	226	104	37	211
PPTDRAFT_00007	Uncharacterized protein YaaQ	370.103	1.05544	0.590842	0.999638	272	293	709	342	217	630
PPTDRAFT_00008	hypothetical protein	267.371	0.923627	0.490496	0.999638	202	193	656	247	127	460
PPTDRAFT_00009	DNA polymerase-3 subunit delta'	922.411	0.898257	0.199241	0.999638	821	838	1573	886	464	1328
PPTDRAFT_00010	Cell fate regulator YaaT, PSP1 superfamily	621.966	0.986638	0.880765	0.999638	441	428	1544	498	329	1216
PPTDRAFT_00011	Regulator of replication initiation timing	517.079	1.07815	0.423407	0.999638	399	441	827	459	342	812
PPTDRAFT_00012	tRNA1(Val) A37 N6-methylase TrmN6	71.7293	1.0369	0.863457	0.999638	46	59	152	83	25	143
PPTDRAFT_00013	16S rRNA (cytidine1402-2'-O)-methyltransferase	126.684	0.920654	0.592684	0.999638	101	85	314	106	67	217
PPTDRAFT_00014	transcriptional pleiotropic regulator of	9299.45	1.29232	0.000335947	0.0822308	6852	8732	9073	10859	6784	11182
PPTDRAFT_00015	hypothetical protein	233.985	0.92156	0.497068	0.999638	179	204	484	196	117	415
PPTDRAFT_00016	TatD DNase family protein	118.104	1.03067	0.8452	0.999638	81	89	264	101	63	230
PPTDRAFT_00018	Uncharacterized protein conserved in bacteria	746.976	1.02711	0.758952	0.999638	517	580	1599	587	475	1319
PPTDRAFT_00019	ribonuclease M5	41.7975	1.13269	0.621928	0.999638	30	18	115	40	18	96
PPTDRAFT_00020	16S rRNA	52.7629	1.17256	0.480834	0.999638	30	28	147	44	26	129
PPTDRAFT_00021	spore coat assemly protein	95.7075	1.08678	0.624994	0.999638	73	60	210	88	48	197
PPTDRAFT_00022	Uncharacterized protein Veg	1913.34	1.00541	0.947832	0.999638	1489	1953	2654	2027	1107	2448
PPTDRAFT_00023	small acid-soluble spore protein F (minor	11.2517	0.791329	0.624321	0.999638	11	13	16	7	5	20
PPTDRAFT_00024	4-diphosphocytidyl-2-C-methyl-D-erythritol	207.836	0.928206	0.599782	0.999638	144	207	397	221	92	319
PPTDRAFT_00025	purine operon repressor, PurR	347.181	1.05423	0.61179	0.999638	207	282	787	261	194	739
PPTDRAFT_00026	stage V sporulation protein G	5886.02	0.981261	0.781173	0.999638	3993	6615	8703	4927	4043	7666
PPTDRAFT_00027	bifunctional UDP-N-acetylglucosamine	957.483	1.00036	0.996386	0.999638	683	650	2337	800	437	2075
PPTDRAFT_00028	ribose-phosphate pyrophosphokinase	777.674	0.950997	0.549085	0.999638	598	527	1913	652	379	1488
PPTDRAFT_00029	hypothetical protein	127.419	0.94607	0.72427	0.999638	100	117	208	137	83	130
PPTDRAFT_00030	peptidyl-tRNA hydrolase, PTH1 family	112.2	0.911327	0.567502	0.999638	80	91	266	72	61	228
PPTDRAFT_00031	Protein of unknown function (DUF2757)	2304.67	1.0278	0.68772	0.999638	2348	1794	2787	2952	1280	2373
PPTDRAFT_00032	transcription-repair coupling factor	580.652	0.978417	0.807649	0.999638	413	421	1393	465	310	1115
PPTDRAFT_00033	foldase protein PrsA	667.569	0.951331	0.562942	0.999638	553	491	1416	662	302	1156
PPTDRAFT_00034	AbrB family transcriptional regulator, stage V	725.109	1.03541	0.689166	0.999638	646	547	1164	886	349	1028
PPTDRAFT_00035	Membrane protein involved in the export of	29.6974	1.2641	0.433052	0.999638	16	21	61	37	17	49
PPTDRAFT_00036	tetrapyrrole methylase family protein / MazG	178.081	0.879989	0.336538	0.999638	154	113	449	174	62	339
PPTDRAFT_00037	DNA-binding protein HU-beta	3270.03	0.989231	0.883138	0.999638	2381	2537	7080	2443	1913	6223
PPTDRAFT_00038	Ribosomal 50S subunit-recycling heat shock	2097.8	1.08441	0.337431	0.999638	1489	1467	4460	1779	1395	3547
PPTDRAFT_00039	sporulation protein YabP	5.01826	1.41022	0.62843	0.999638	4	1	13	5	2	14
PPTDRAFT_00040	spore cortex biosynthesis protein YabQ	328.777	0.989086	0.919686	0.999638	241	264	676	317	192	490
PPTDRAFT_00041	cell division protein DivIC	249.413	0.9857	0.901362	0.999638	161	192	609	182	130	530
PPTDRAFT_00042	S1 RNA binding domain protein	3278.51	0.991675	0.915122	0.999638	2342	2261	8004	2426	1886	6375
PPTDRAFT_00043	stage II sporulation protein E	6.80561	0.905333	0.872287	0.999638	6	2	23	6	4	9
PPTDRAFT_00044	Ca-activated chloride channel family protein	8.99402	1.0424	0.938412	0.999638	8	3	25	6	6	17
PPTDRAFT_00045	serine/threonine protein kinase	240.147	0.954396	0.691184	0.999638	187	191	501	204	138	392
PPTDRAFT_00046	tRNA(Ile)-lysidine synthase	1241.41	0.988285	0.874912	0.999638	920	1092	2308	1119	763	1849
PPTDRAFT_00047	hypoxanthine phosphoribosyltransferase	971.284	0.981506	0.816297	0.999638	682	837	1992	746	571	1764
PPTDRAFT_00048	cell division protease FtsH	5323.96	0.954442	0.467542	0.999638	3714	4822	10854	4213	3120	9037
PPTDRAFT_00049	L-aspartate oxidase	417.15	0.911702	0.341632	0.999638	305	381	864	347	230	669
PPTDRAFT_00050	nicotinate-nucleotide pyrophosphorylase	199.519	0.899737	0.406778	0.999638	154	152	475	188	89	341
PPTDRAFT_00051	type III pantothenate kinase	592.66	1.01391	0.87467	0.999638	487	458	1097	591	317	955
PPTDRAFT_00052	molecular chaperone Hsp33	125.122	1.00661	0.965222	0.999638	104	84	264	129	57	224
PPTDRAFT_00053	foldase protein PrsA	81.0454	1.03122	0.86747	0.999638	62	57	174	79	35	165
PPTDRAFT_00054	cysteine synthase A	6597.59	1.01984	0.757722	0.999638	5211	4024	15592	6475	2927	12888
PPTDRAFT_00055	para-aminobenzoate synthetase component 1	307.24	1.05041	0.650263	0.999638	238	190	703	289	152	599
PPTDRAFT_00056	para-aminobenzoate synthetase component 2	355.713	0.933656	0.51716	0.999638	264	225	968	277	170	715
PPTDRAFT_00057	4-amino-4-deoxychorismate lyase	326.752	0.94391	0.598574	0.999638	290	204	741	337	154	515
PPTDRAFT_00058	dihydropteroate synthase	78.9862	0.915925	0.6407	0.999638	58	62	187	78	33	139
PPTDRAFT_00059	dihydroneopterin aldolase	82.068	0.886227	0.52339	0.999638	86	50	173	71	42	128
PPTDRAFT_00060	2-amino-4-hydroxy-6-hydroxymethyldihydropteridine diphosphokinase	298.479	1.03462	0.762654	0.999638	248	201	592	319	165	448
PPTDRAFT_00061	Helix-turn-helix	22.0114	0.790327	0.496599	0.999638	15	14	73	12	7	58
PPTDRAFT_00062	tRNA-U20-dihydrouridine synthase	469.37	1.01442	0.879615	0.999638	338	355	1023	388	252	916
PPTDRAFT_00063	transcription elongation factor GreA	4075.1	0.940577	0.381904	0.999638	3128	4056	6849	3505	2402	6027
PPTDRAFT_00064	lysyl-tRNA synthetase, class II	1567	1.00499	0.945174	0.999638	1119	1049	3854	1300	758	3281
PPTDRAFT_00065	trk system potassium uptake protein TrkH	392.113	1.01019	0.918896	0.999638	290	254	953	351	187	783
PPTDRAFT_00066	hypothetical protein	185.983	0.862703	0.282153	0.999638	109	178	462	92	104	401
PPTDRAFT_00067	Enoyl-[acyl-carrier-protein] reductase [NADH]	46.9103	0.825929	0.431579	0.999638	41	30	126	29	20	103
PPTDRAFT_00068	Acyl-CoA synthetase (AMP-forming)/AMP-acid	27.1408	0.588403	0.108992	0.999638	27	30	59	13	8	54
PPTDRAFT_00069	aldehyde dehydrogenase (NAD+)	13.7292	0.622193	0.308874	0.999638	13	7	47	3	5	37
PPTDRAFT_00070	acetolactate synthase-1/2/3 large subunit	15.062	0.770036	0.526643	0.999638	20	8	31	12	7	21
PPTDRAFT_00071	3-oxoacyl-[acyl-carrier-protein] synthase II (EC	4.91532	0.860031	0.829217	0.999638	5	3	10	3	4	6
PPTDRAFT_00072	3-hydroxyacyl-[acyl-carrier-protein] dehydratase	1.22508	0.478233	0.632046	0.999638	2	0	5	0	0	4
PPTDRAFT_00073	non-ribosomal peptide synthase domain	79.7663	0.801094	0.28864	0.999638	88	52	173	48	39	150
PPTDRAFT_00074	non-ribosomal peptide synthase domain	152.583	1.10219	0.509052	0.999638	138	102	259	142	83	287
PPTDRAFT_00075	Pimeloyl-ACP methyl ester carboxylesterase	4.09017	0.564891	0.47091	0.999638	6	2	11	2	1	8
PPTDRAFT_00076	IMP dehydrogenase	5009.57	1.02204	0.737553	0.999638	3430	3592	11838	4065	2693	10016
PPTDRAFT_00077	D-alanyl-D-alanine carboxypeptidase	524.765	0.972885	0.772499	0.999638	321	470	1192	409	274	1030
PPTDRAFT_00078	pyridoxal phosphate synthase yaaD subunit	1231.53	0.967423	0.663677	0.999638	987	830	2863	1087	596	2315
PPTDRAFT_00079	5'-phosphate synthase pdxT subunit	390.97	1.1037	0.349839	0.999638	255	214	1057	336	195	862
PPTDRAFT_00080	seryl-tRNA synthetase	1880.97	0.960422	0.56698	0.999638	1359	1474	4267	1507	996	3544
PPTDRAFT_00081	tRNA_Ser_TGA	19905.9	1.14614	0.0724646	0.999638	7910	23533	30907	12757	19434	24604
PPTDRAFT_00082	hypothetical protein	9.94514	1.24247	0.664422	0.999638	6	6	21	15	4	17
PPTDRAFT_00083	hypothetical protein	5.63355	1.80597	0.391224	0.999638	1	7	7	4	3	18
PPTDRAFT_00084	small acid-soluble spore protein P (minor)	23.6857	0.745904	0.373927	0.999638	20	26	47	19	9	38
PPTDRAFT_00085	hypothetical protein	6766.95	0.91311	0.212646	0.999638	4777	7592	11068	5041	4277	9955
PPTDRAFT_00086	ribosomal-protein-alanine N-acetyltransferase	88.6702	0.985432	0.93689	0.999638	73	73	159	60	59	156
PPTDRAFT_00087	tRNA(adenine34) deaminase	60.3554	1.10366	0.637871	0.999638	39	48	120	61	36	99
PPTDRAFT_00088	PAS domain S-box-containing protein	834.108	0.951771	0.576727	0.999638	589	791	1617	664	450	1507
PPTDRAFT_00089	23S rRNA pseudouridine2604 synthase	297.878	1.05716	0.608431	0.999638	205	215	664	267	161	570
PPTDRAFT_00090	chemotaxis protein MotB	1269.01	1.01361	0.856854	0.999638	811	1211	2398	1042	827	2006
PPTDRAFT_00091	chemotaxis protein MotA	715.894	0.895204	0.189838	0.999638	498	664	1552	508	436	1169
PPTDRAFT_00092	hypothetical protein	35.9168	1.12463	0.672348	0.999638	23	25	74	45	22	46
PPTDRAFT_00093	4a-hydroxytetrahydrobiopterin dehydratase	336.407	1.08176	0.461817	0.999638	227	302	573	338	218	479
PPTDRAFT_00094	Protein N-acetyltransferase, RimJ/RimL family	122.455	0.898332	0.484491	0.999638	115	87	255	117	53	207
PPTDRAFT_00095	Cell wall-associated hydrolases	677.71	0.95418	0.588153	0.999638	518	555	1394	598	397	1041
PPTDRAFT_00097	hypothetical protein	11.0719	0.54494	0.231702	0.999638	17	10	18	4	4	18
PPTDRAFT_00098	hypothetical protein	3.93268	1.07773	0.922761	0.999638	4	2	7	3	3	6
PPTDRAFT_00099	Aminopeptidase N	1.87842	0.798345	0.838254	0.999638	1	3	3	1	1	3
PPTDRAFT_00100	YwhD family protein	316.27	1.06185	0.581759	0.999638	234	209	704	294	175	576
PPTDRAFT_00101	PTS system IIA component, Glc family (TC 4.A.1)	214.699	0.951382	0.690584	0.999638	158	175	463	212	108	341
PPTDRAFT_00102	hypothetical protein	29.163	1.02672	0.934372	0.999638	12	33	62	33	13	46
PPTDRAFT_00103	Uncharacterized protein YjbI, contains	420.763	0.957558	0.666057	0.999638	306	376	831	403	222	658
PPTDRAFT_00104	Glyoxalase superfamily enzyme, possibly	1.67175	8.82153	0.10963	0.999638	0	1	0	3	2	3
PPTDRAFT_00105	hypothetical protein	26.8173	0.911364	0.76503	0.999638	26	17	57	21	16	42
PPTDRAFT_00106	hypothetical protein	0.62723	0.604452	0.806682	NA	1	1	0	0	0	2
PPTDRAFT_00107	penicillin-binding protein, 1A family	21.5942	1.0073	0.98287	0.999638	18	18	35	17	16	30
PPTDRAFT_00108	spermidine synthase	215.159	1.03594	0.772216	0.999638	139	185	439	163	137	393
PPTDRAFT_00109	Major Facilitator Superfamily protein	25.0699	0.869107	0.660146	0.999638	21	16	65	27	8	45
PPTDRAFT_00110	ATP-binding cassette, subfamily B	49.8352	0.721125	0.167161	0.999638	54	39	109	42	15	87
PPTDRAFT_00111	ATP-binding cassette, subfamily B	59.5367	0.968341	0.880688	0.999638	49	63	80	46	40	83
PPTDRAFT_00112	transcriptional regulator, LysR family	21.668	0.83083	0.58261	0.999638	18	17	52	17	11	35
PPTDRAFT_00113	Uncharacterized beta-barrel protein YwiB,	167.239	0.934836	0.614799	0.999638	124	142	355	143	92	274
PPTDRAFT_00114	arginyl-tRNA synthetase	886.92	1.00308	0.970751	0.999638	663	686	1847	705	521	1621
PPTDRAFT_00115	hypothetical protein	110.682	1.01073	0.947095	0.999638	100	75	201	137	51	157
PPTDRAFT_00116	DNA-binding transcriptional regulator, LysR	0.676991	0.472417	0.706221	NA	0	1	2	0	1	0
PPTDRAFT_00117	iron(III) transport system ATP-binding protein	0.841693	1.04841	0.977864	0.999638	0	1	2	2	0	1
PPTDRAFT_00118	iron(III) transport system substrate-binding	2.01717	3.36434	0.291048	0.999638	1	0	3	3	2	4
PPTDRAFT_00119	iron(III) transport system permease protein	4.20509	2.04861	0.409065	0.999638	0	1	21	4	3	7
PPTDRAFT_00120	RNA processing exonuclease, beta-lactamase fold,	7.81771	1.68193	0.357665	0.999638	3	4	17	9	6	15
PPTDRAFT_00121	Subtilisin-like serine proteases	40.4865	0.760541	0.312625	0.999638	33	52	66	32	15	65
PPTDRAFT_00122	DNA-directed RNA polymerase subunit delta	4265.81	1.00122	0.984817	0.999638	3104	3881	7620	3729	2704	6428
PPTDRAFT_00123	CTP synthase	604.116	0.957597	0.632188	0.999638	465	405	1478	573	281	1082
PPTDRAFT_00124	two-component system, response regulator, stage	147.803	1.0131	0.927441	0.999638	99	142	252	128	109	189
PPTDRAFT_00125	fructose-bisphosphate aldolase, class II	10007.4	0.913755	0.2242	0.999638	6351	10222	19854	5823	6894	17195
PPTDRAFT_00126	UDP-N-acetylglucosamine	281.897	1.10297	0.395237	0.999638	204	145	728	250	133	632
PPTDRAFT_00127	transcription termination factor Rho	278.683	1.11204	0.359075	0.999638	187	153	727	257	135	601
PPTDRAFT_00128	Pyruvate-formate lyase-activating enzyme	360.282	1.06175	0.593571	0.999638	320	200	771	321	174	750
PPTDRAFT_00129	large subunit ribosomal protein L31	4637.4	0.980502	0.766812	0.999638	3254	5037	6826	4117	3232	5578
PPTDRAFT_00130	Bacterial large signal recognition particle RNA	131464	0.704565	0.448563	0.999638	140676	117215	172528	21784	124845	198990
PPTDRAFT_00131	DNA polymerase-3 subunit gamma/tau	384.948	1.10087	0.350844	0.999638	275	217	951	359	188	809
PPTDRAFT_00132	hypothetical protein	855.311	1.04902	0.55177	0.999638	627	619	1816	802	438	1625
PPTDRAFT_00133	DNA replication and repair protein RecR	1426.99	0.970787	0.689551	0.999638	965	1340	2763	1053	949	2297
PPTDRAFT_00134	Protein of unknown function (DUF2508)	5.44771	0.829284	0.780469	0.999638	3	5	15	2	3	13
PPTDRAFT_00135	inhibitor of the pro-sigma K processing	3.45268	2.12714	0.398793	0.999638	0	2	10	4	3	6
PPTDRAFT_00136	tRNA_Ser_GCT	2937.46	0.955861	0.553817	0.999638	2655	2784	3716	3602	1651	2833
PPTDRAFT_00137	tRNA_Met_CAT	1004.83	1.4058	0.218693	0.999638	226	927	1334	308	1594	1118
PPTDRAFT_00138	tRNA_Val_TAC	645.292	1.13742	0.235141	0.999638	384	533	1169	506	576	860
PPTDRAFT_00139	tRNA_Thr_TGT	932.172	1.16081	0.113977	0.999638	697	620	1730	1035	605	1334
PPTDRAFT_00140	tRNA_Asp_GTC	1454.39	0.905811	0.221491	0.999638	1273	980	3372	1372	721	2251
PPTDRAFT_00141	tRNA_Phe_GAA	152.771	1.19875	0.198754	0.999638	96	115	288	147	104	258
PPTDRAFT_00142	tRNA_Tyr_GTA	71.7761	0.790952	0.237064	0.999638	59	81	119	42	50	91
PPTDRAFT_00143	tRNA_Lys_TTT	67.0111	0.908633	0.636853	0.999638	25	98	111	29	60	84
PPTDRAFT_00144	Sugar diacid utilization regulator	196.334	2.22947	4.43999e-08	2.17358e-05	75	89	297	197	198	417
PPTDRAFT_00145	multiple sugar transport system ATP-binding	1258.36	1.08794	0.319273	0.999638	846	864	2861	1064	788	2286
PPTDRAFT_00146	Hpr(Ser) kinase/phosphatase	251.75	1.1341	0.277391	0.999638	174	175	523	243	127	522
PPTDRAFT_00147	Prolipoprotein diacylglyceryl transferase	215.798	0.978299	0.860487	0.999638	156	159	504	190	93	452
PPTDRAFT_00148	pyrophosphatase PpaX	197.495	0.958212	0.738226	0.999638	145	137	490	167	83	424
PPTDRAFT_00149	Acetyltransferase (isoleucine patch superfamily)	166.784	0.969251	0.817186	0.999638	113	127	405	140	86	313
PPTDRAFT_00150	Surface polysaccharide O-acyltransferase,	79.4679	1.07697	0.688549	0.999638	51	67	153	61	58	131
PPTDRAFT_00151	ATP phosphoribosyltransferase regulatory subunit	17.6416	0.246768	0.000718187	0.143442	26	16	60	6	5	10
PPTDRAFT_00152	ATP phosphoribosyltransferase	9.18191	0.522116	0.236671	0.999638	7	12	23	10	1	11
PPTDRAFT_00153	histidinol dehydrogenase	21.7429	0.469917	0.0366587	0.999638	29	14	67	10	5	37
PPTDRAFT_00154	imidazoleglycerol-phosphate dehydratase	13.2783	0.629169	0.291089	0.999638	19	11	22	11	4	17
PPTDRAFT_00155	glutamine amidotransferase	9.30198	0.727115	0.535197	0.999638	11	9	14	6	5	12
PPTDRAFT_00156	1-(5-phosphoribosyl)-5-[(5-phosphoribosylamino)methylideneamino] imidazole-4-carboxamide isomerase	10.5769	1.09243	0.865364	0.999638	12	1	30	14	4	15
PPTDRAFT_00157	cyclase	18.2214	0.833215	0.622472	0.999638	21	10	38	22	6	25
PPTDRAFT_00158	phosphoribosyl-ATP pyrophosphatase	23.1278	0.787935	0.484116	0.999638	20	18	57	14	8	55
PPTDRAFT_00159	histidinol-phosphatase (PHP family)	38.5811	0.916021	0.731669	0.999638	33	29	82	34	20	63
PPTDRAFT_00160	Thioredoxin domain-containing protein	542.604	0.947061	0.561092	0.999638	438	403	1179	532	231	994
PPTDRAFT_00161	thioredoxin reductase (NADPH)	360.723	1.0458	0.668794	0.999638	261	203	934	363	145	763
PPTDRAFT_00162	glucokinase	363.382	1.00611	0.954371	0.999638	249	268	846	265	222	693
PPTDRAFT_00163	UPF0042 nucleotide-binding protein	332.061	1.09663	0.389884	0.999638	258	242	619	330	167	637
PPTDRAFT_00164	conserved hypothetical protein, cofD-related	102.513	1.20137	0.301244	0.999638	68	40	287	125	35	230
PPTDRAFT_00165	hypothetical protein	332.488	1.04181	0.700936	0.999638	243	249	691	270	196	627
PPTDRAFT_00166	catabolite repression HPr-like protein	1496.59	0.996408	0.962602	0.999638	1104	1463	2415	1455	903	2062
PPTDRAFT_00167	hypothetical protein	83.6688	1.05721	0.762568	0.999638	64	62	166	67	45	175
PPTDRAFT_00168	Copper amine oxidase N-terminal	1023.12	1.04643	0.561896	0.999638	753	636	2459	957	480	2079
PPTDRAFT_00169	ATP-dependent Clp protease, protease subunit	1766.18	1.00485	0.955886	0.999638	1125	1254	4520	1246	1122	3284
PPTDRAFT_00170	tRNA_Arg_CCG	515.544	1.00041	0.996424	0.999638	343	674	484	428	447	413
PPTDRAFT_00171	central glycolytic genes regulator	439.035	1.03208	0.764057	0.999638	348	244	1090	417	220	810
PPTDRAFT_00172	glyceraldehyde 3-phosphate dehydrogenase	14768.4	1.04844	0.537496	0.999638	10009	8671	39639	11044	7776	32533
PPTDRAFT_00173	phosphoglycerate kinase	2041.21	1.00462	0.953568	0.999638	1364	1044	6282	1498	875	4923
PPTDRAFT_00174	triosephosphate isomerase	1526.32	1.01753	0.827686	0.999638	1141	805	4179	1229	662	3528
PPTDRAFT_00175	phosphoglycerate mutase	3284.57	1.00942	0.908303	0.999638	2336	1779	9313	2391	1545	7621
PPTDRAFT_00176	enolase	4982.55	1.01298	0.875157	0.999638	3083	2600	15764	3223	2328	12375
PPTDRAFT_00177	preprotein translocase subunit SecG	2546.74	1.02784	0.721595	0.999638	1780	2812	3361	2526	1716	2964
PPTDRAFT_00178	ribonuclease R	320.367	1.04057	0.716799	0.999638	227	192	820	307	148	639
PPTDRAFT_00179	SsrA-binding protein	875.446	1.00718	0.928491	0.999638	574	813	1687	710	560	1424
PPTDRAFT_00180	transfer-messenger RNA	54510.3	1.13195	0.129521	0.999638	38496	33271	124729	48119	33736	100542
PPTDRAFT_00181	Site-specific recombinases, DNA invertase Pin	1.7502	1.89449	0.583763	0.999638	1	1	2	1	1	7
PPTDRAFT_00182	hypothetical protein	0.945773	1.38883	0.849638	0.999638	0	0	6	2	0	1
PPTDRAFT_00183	hypothetical protein	2.51707	1.29469	0.799857	0.999638	0	4	5	1	2	5
PPTDRAFT_00184	hypothetical protein	8884.87	0.964747	0.617833	0.999638	5580	9953	15069	6603	5756	13894
PPTDRAFT_00185	hypothetical protein	435.145	0.975243	0.804743	0.999638	270	434	857	377	260	673
PPTDRAFT_00186	Uncharacterized protein conserved in bacteria	318.352	0.978382	0.836823	0.999638	240	222	749	288	153	600
PPTDRAFT_00187	Uncharacterized protein YjbI, contains	343.591	1.07021	0.51787	0.999638	254	212	800	304	158	766
PPTDRAFT_00188	hypothetical protein	165.951	1.07525	0.61351	0.999638	98	105	451	155	83	331
PPTDRAFT_00189	protein of unknown function (DUF4280)	651.929	1.01814	0.834467	0.999638	476	591	1128	617	407	940
PPTDRAFT_00190	Uncharacterized protein YnzC, UPF0291/DUF896	115.619	0.918107	0.584748	0.999638	108	112	147	120	75	108
PPTDRAFT_00191	putative oxidoreductase	4.98467	0.925719	0.910529	0.999638	5	4	7	4	4	5
PPTDRAFT_00192	glyoxalase family protein	14.8453	1.1213	0.778094	0.999638	7	13	33	10	11	28
PPTDRAFT_00193	Glycosyltransferase, GT2 family	26.4864	1.10034	0.770329	0.999638	32	15	33	22	19	37
PPTDRAFT_00194	transcriptional regulator, GntR family	458.463	0.903231	0.309268	0.999638	378	505	636	451	265	522
PPTDRAFT_00195	xylulose-5-phosphate/fructose-6-phosphate	70.066	0.893183	0.562963	0.999638	45	64	165	45	43	123
PPTDRAFT_00196	Aldo/keto reductase	272.249	1.00894	0.936372	0.999638	180	242	547	215	170	470
PPTDRAFT_00197	phage shock protein A (PspA) family protein	87.0946	0.897601	0.545464	0.999638	79	68	174	83	37	149
PPTDRAFT_00198	replication restart DNA helicase PriA	90.3568	1.10488	0.577642	0.999638	69	46	217	110	34	177
PPTDRAFT_00199	uncharacterized protein	63.8863	0.981893	0.931372	0.999638	42	40	179	55	35	113
PPTDRAFT_00200	Membrane protease subunit, stomatin/prohibitin	191.078	1.05162	0.697347	0.999638	156	145	347	188	97	344
PPTDRAFT_00201	Alpha-L-arabinofuranosidase	22.7505	0.840811	0.60787	0.999638	19	17	53	14	16	33
PPTDRAFT_00202	3-phytase	28.2899	1.14435	0.657117	0.999638	23	19	47	23	23	42
PPTDRAFT_00203	AraC-type DNA-binding protein	9.09006	0.904466	0.847039	0.999638	10	6	16	6	6	14
PPTDRAFT_00204	hypothetical protein	1.71915	1.27731	0.841714	0.999638	1	2	1	0	2	4
PPTDRAFT_00205	Beta-L-arabinofuranosidase, GH127	0.0791806	0.610884	0.861243	NA	0	0	1	0	0	0
PPTDRAFT_00206	sugar (Glycoside-Pentoside-Hexuronide)	42.5697	0.86485	0.553992	0.999638	42	40	64	38	24	53
PPTDRAFT_00207	putative efflux protein, MATE family	242.143	1.05615	0.650011	0.999638	180	193	443	269	135	354
PPTDRAFT_00208	zinc-binding alcohol	6.98197	1.33284	0.626677	0.999638	4	6	11	7	3	18
PPTDRAFT_00209	transcriptional regulator, LysR family	25.4444	0.896411	0.733037	0.999638	22	25	43	21	11	47
PPTDRAFT_00210	Uncharacterized membrane protein YckC, RDD	147.72	0.96448	0.804084	0.999638	108	115	326	152	74	231
PPTDRAFT_00211	hypothetical protein	6.97802	0.865965	0.806131	0.999638	4	8	13	4	6	8
PPTDRAFT_00212	transcriptional regulator, AraC family	15.9661	1.31629	0.496385	0.999638	8	9	39	19	5	43
PPTDRAFT_00213	Uncharacterized protein YwqG	55.9126	0.893416	0.603326	0.999638	47	51	101	59	27	75
PPTDRAFT_00214	hypothetical protein	19.2131	1.2732	0.527579	0.999638	5	21	40	20	12	32
PPTDRAFT_00215	beta-galactosidase	6.46535	1.01713	0.977692	0.999638	4	7	11	4	4	13
PPTDRAFT_00216	lactose/L-arabinose transport system permease	0.320526	1.23525	0.940198	NA	1	0	0	0	0	1
PPTDRAFT_00217	lactose/L-arabinose transport system permease	0.0940617	2.08505	0.794493	NA	0	0	0	0	0	1
PPTDRAFT_00218	lactose/L-arabinose transport system	1.15622	0.985351	0.992093	0.999638	0	1	3	0	2	1
PPTDRAFT_00219	two-component system, sensor histidine kinase	16.3625	1.00481	0.990125	0.999638	13	10	38	18	8	26
PPTDRAFT_00220	two component transcriptional regulator, AraC	25.4084	1.03233	0.920247	0.999638	16	20	55	15	20	45
PPTDRAFT_00221	uridine kinase	287.329	0.90246	0.355603	0.999638	234	231	617	274	131	475
PPTDRAFT_00222	hypothetical protein	53.0405	1.11072	0.640685	0.999638	48	35	90	50	29	99
PPTDRAFT_00223	pectate lyase	481.301	0.957407	0.648614	0.999638	319	418	1066	333	280	929
PPTDRAFT_00224	hypothetical protein	2587.95	0.951244	0.500731	0.999638	1964	2895	3568	2156	1736	3273
PPTDRAFT_00225	Superfamily II DNA or RNA helicase, SNF2 family	43.3974	0.950813	0.838962	0.999638	41	30	81	55	14	71
PPTDRAFT_00226	hypothetical protein	34.8299	1.19988	0.498393	0.999638	26	21	69	35	20	67
PPTDRAFT_00227	spore germination protein	23.4476	0.834982	0.586985	0.999638	21	27	31	27	10	25
PPTDRAFT_00228	spore germination protein	6.32579	1.17622	0.794201	0.999638	7	2	12	8	3	10
PPTDRAFT_00229	spore germination protein	2.63656	0.780998	0.814435	0.999638	0	4	8	0	1	9
PPTDRAFT_00230	beta-phosphoglucomutase	4.33239	0.657602	0.600122	0.999638	1	3	23	1	2	9
PPTDRAFT_00231	maltose phosphorylase (EC 2.4.1.8)	33.9394	0.929585	0.790784	0.999638	34	18	78	33	14	61
PPTDRAFT_00232	transcriptional regulator, LacI family	327.479	1.06587	0.544287	0.999638	218	276	638	264	206	597
PPTDRAFT_00233	PTS system, glucose-specific IIC component	59.7074	0.709712	0.107336	0.999638	58	44	158	43	22	105
PPTDRAFT_00234	maltose 6'-phosphate phosphatase	104.552	0.888989	0.48043	0.999638	94	67	247	110	34	195
PPTDRAFT_00235	MFS transporter, DHA1 family, multidrug	37.5169	1.23866	0.410653	0.999638	25	27	65	38	27	59
PPTDRAFT_00236	Uncharacterized damage-inducible protein DinB	57.8136	1.01098	0.960746	0.999638	42	33	152	63	27	97
PPTDRAFT_00237	2-polyprenyl-6-methoxyphenol hydroxylase	20.7143	1.12492	0.73714	0.999638	10	19	42	20	15	29
PPTDRAFT_00238	DNA-binding transcriptional regulator, MarR	165.851	1.07995	0.581741	0.999638	102	170	266	162	107	237
PPTDRAFT_00239	two-component system, response regulator YcbB	71.7119	1.21584	0.335978	0.999638	46	42	160	50	51	156
PPTDRAFT_00240	two-component system, sensor histidine kinase	69.6567	1.02917	0.886069	0.999638	46	59	138	43	52	125
PPTDRAFT_00241	proton glutamate symport protein	661.043	1.02029	0.823162	0.999638	490	488	1404	656	366	1059
PPTDRAFT_00242	methyl-accepting chemotaxis sensory transducer	697.1	1.00968	0.909098	0.999638	528	519	1475	633	378	1228
PPTDRAFT_00243	putative membrane protein	338.63	0.884791	0.265711	0.999638	250	395	523	298	199	421
PPTDRAFT_00244	peptide/nickel transport system	4780.85	0.985177	0.818108	0.999638	3599	3576	10508	4451	2442	8377
PPTDRAFT_00245	peptide/nickel transport system permease protein	377.119	1.01645	0.878159	0.999638	301	231	883	348	199	675
PPTDRAFT_00246	peptide/nickel transport system permease protein	263.649	0.964174	0.747439	0.999638	215	201	542	253	127	455
PPTDRAFT_00247	peptide/nickel transport system ATP-binding	189.819	1.04698	0.726151	0.999638	165	112	394	219	69	373
PPTDRAFT_00248	oligopeptide transport system ATP-binding	208.289	0.993167	0.95759	0.999638	186	113	490	186	84	453
PPTDRAFT_00249	hypothetical protein	355.624	0.95578	0.671195	0.999638	333	228	726	395	129	642
PPTDRAFT_00250	iron complex transport system permease protein	126.849	0.985654	0.926018	0.999638	89	108	255	131	72	179
PPTDRAFT_00251	Acetyltransferases	207.469	1.06509	0.6225	0.999638	144	143	468	221	96	387
PPTDRAFT_00252	carbohydrate ABC transporter substrate-binding	1.78783	2.24965	0.499255	0.999638	2	0	2	1	2	4
PPTDRAFT_00253	multiple sugar transport system permease protein	0.919433	0.646361	0.800954	0.999638	1	0	4	0	0	4
PPTDRAFT_00254	multiple sugar transport system permease protein	2.06717	1.11868	0.92257	0.999638	5	0	2	1	1	3
PPTDRAFT_00255	Response regulator containing CheY-like receiver	4.80355	1.46031	0.600976	0.999638	1	4	12	5	2	13
PPTDRAFT_00256	Predicted dehydrogenases and related proteins	1.57446	1.51239	0.749911	0.999638	3	1	0	1	1	2
PPTDRAFT_00257	hypothetical protein	263.6	0.981345	0.874306	0.999638	158	259	530	157	174	510
PPTDRAFT_00258	carbonic anhydrase	6.78212	1.08425	0.892623	0.999638	4	4	18	6	5	10
PPTDRAFT_00259	alcohol dehydrogenase, propanol-preferring	5786.44	0.982665	0.783764	0.999638	4335	5234	10436	4984	3561	8901
PPTDRAFT_00260	transcriptional regulator, HxlR family	41.678	1.13103	0.63586	0.999638	20	44	77	42	22	75
PPTDRAFT_00261	Multidrug resistance protein	3.70082	0.753651	0.731218	0.999638	4	1	13	2	2	6
PPTDRAFT_00262	Aldo/keto reductase	17.5289	1.21891	0.60594	0.999638	17	7	33	19	11	28
PPTDRAFT_00263	transcriptional regulator, LacI family	109.6	1.0311	0.848628	0.999638	83	87	213	96	60	202
PPTDRAFT_00264	beta-fructofuranosidase	3.72921	1.62446	0.554491	0.999638	2	4	3	5	1	10
PPTDRAFT_00265	PTS system, sucrose-specific IIC component	4.38709	0.898228	0.887015	0.999638	6	1	10	5	2	5
PPTDRAFT_00266	Response regulator containing CheY-like receiver	80.4479	0.828577	0.320368	0.999638	48	86	177	51	60	99
PPTDRAFT_00267	pyruvate kinase	821.634	1.10055	0.244838	0.999638	561	640	1604	719	529	1427
PPTDRAFT_00268	hypothetical protein	150.002	0.898449	0.454742	0.999638	107	179	225	127	94	183
PPTDRAFT_00269	spore germination protein KB	9.47153	1.27077	0.640741	0.999638	7	4	22	7	5	26
PPTDRAFT_00270	hypothetical protein	0.494111	4.72823	0.520399	NA	0	0	0	0	1	2
PPTDRAFT_00271	spore germination protein KC	6.40686	1.06372	0.922724	0.999638	5	9	5	7	2	11
PPTDRAFT_00272	spore germination protein KA	6.33317	1.01195	0.984513	0.999638	4	5	15	5	3	14
PPTDRAFT_00273	Uncharacterized membrane protein YhaH, DUF805	13804.9	0.943719	0.433416	0.999638	10242	17039	16509	11999	9395	15104
PPTDRAFT_00274	arabinan endo-1,5-alpha-L-arabinosidase	17.9703	1.16877	0.679372	0.999638	9	16	37	19	8	38
PPTDRAFT_00275	cspA thermoregulator	83259.7	0.966454	0.59993	0.999638	69355	83041	115258	86268	50265	97203
PPTDRAFT_00276	cold shock protein (beta-ribbon, CspA family)	0	#VALUE!	NA	NA	0	0	0	0	0	0
PPTDRAFT_00277	Cold-inducible protein YdjO	4710	0.976494	0.728316	0.999638	3295	5164	7049	3744	3264	6419
PPTDRAFT_00278	Pimeloyl-ACP methyl ester carboxylesterase	7.01069	2.90171	0.0893431	0.999638	3	1	11	9	7	15
PPTDRAFT_00279	hypothetical protein	500.986	1.01424	0.883612	0.999638	381	530	664	500	319	613
PPTDRAFT_00280	Acetyltransferases, including N-acetylases of	165.831	1.02409	0.86213	0.999638	137	151	244	182	91	226
PPTDRAFT_00281	hypothetical protein	1.18168	0.183484	0.268354	0.999638	1	1	7	1	0	0
PPTDRAFT_00282	GntR family transcriptional regulator	13.5891	1.24516	0.605277	0.999638	12	7	24	16	6	28
PPTDRAFT_00283	ABC-2 type transport system ATP-binding protein	22.3482	1.17125	0.641264	0.999638	22	10	40	27	13	32
PPTDRAFT_00284	ABC-2 type transport system permease protein	28.6804	0.835911	0.545449	0.999638	25	22	67	21	14	51
PPTDRAFT_00285	Membrane protein CcdC involved in cytochrome C	38.9913	0.84416	0.535707	0.999638	38	25	83	37	26	38
PPTDRAFT_00286	Predicted SnoaL-like aldol	133.311	1.07564	0.62707	0.999638	65	99	363	95	68	320
PPTDRAFT_00287	glutamate racemase	98.5832	0.941778	0.733542	0.999638	57	76	275	83	37	221
PPTDRAFT_00288	transcriptional regulator, LacI family	33.8438	1.10339	0.726538	0.999638	18	21	94	22	23	71
PPTDRAFT_00289	Cellobiose phosphorylase	62.8009	0.963676	0.858302	0.999638	41	48	155	42	39	119
PPTDRAFT_00290	beta-glucosidase	9.92202	1.41029	0.49806	0.999638	5	5	23	5	7	30
PPTDRAFT_00291	carbohydrate ABC transporter substrate-binding	22.3915	0.831387	0.610192	0.999638	15	32	33	22	7	35
PPTDRAFT_00292	carbohydrate ABC transporter membrane protein 1,	32.5049	0.820643	0.478346	0.999638	31	27	63	27	19	41
PPTDRAFT_00293	carbohydrate ABC transporter membrane protein 2,	30.5048	0.864257	0.618941	0.999638	26	20	75	35	13	41
PPTDRAFT_00294	RNA polymerase sigma-70 factor, ECF subfamily	2.65989	0.361666	0.333868	0.999638	4	2	4	0	3	1
PPTDRAFT_00295	ATP-binding cassette, subfamily B, MsbA	4.95503	1.57373	0.532675	0.999638	2	3	6	3	8	4
PPTDRAFT_00296	putative bacteriocin precursor, CLI_3235 family	2.2143	0.481177	0.532752	0.999638	7	0	2	2	0	1
PPTDRAFT_00297	uncharacterized protein	2.42473	0.833647	0.862837	0.999638	4	0	7	1	1	5
PPTDRAFT_00298	peptide maturation system protein, TIGR04066	13.054	1.24651	0.607814	0.999638	8	10	23	11	10	23
PPTDRAFT_00299	peptide maturation system acyl carrier-related	7.38509	1.10345	0.87666	0.999638	12	2	9	3	6	12
PPTDRAFT_00300	hypothetical protein	756.267	0.981865	0.831249	0.999638	522	686	1481	551	477	1331
PPTDRAFT_00301	Subtilisin-like serine proteases	39.949	1.16061	0.571829	0.999638	25	35	71	37	18	93
PPTDRAFT_00302	alpha-N-arabinofuranosidase	41.5762	0.904755	0.685342	0.999638	32	40	75	39	25	52
PPTDRAFT_00303	molecular chaperone HtpG	112.12	1.04507	0.796201	0.999638	108	54	242	118	59	178
PPTDRAFT_00304	hypothetical protein	59.786	1.04249	0.848101	0.999638	47	28	160	66	25	111
PPTDRAFT_00305	glycerophosphoryl diester phosphodiesterase	103.547	0.981082	0.91124	0.999638	100	67	196	93	61	159
PPTDRAFT_00306	Methylase involved in ubiquinone/menaquinone	71.6023	0.973035	0.89049	0.999638	46	66	153	63	33	139
PPTDRAFT_00307	UTP--glucose-1-phosphate uridylyltransferase	3.07899	1.39105	0.70826	0.999638	2	1	7	3	3	4
PPTDRAFT_00308	Putative flippase GtrA (transmembrane	0.934848	3.72802	0.416477	0.999638	0	0	2	1	1	3
PPTDRAFT_00309	dolichol-phosphate mannosyltransferase	8.07787	1.47823	0.484279	0.999638	2	10	10	7	8	10
PPTDRAFT_00310	4-amino-4-deoxy-L-arabinose transferase and	7.3972	2.28299	0.16506	0.999638	2	6	8	5	6	24
PPTDRAFT_00311	DNA-binding response regulator, OmpR family,	25.4451	1.15395	0.653189	0.999638	22	16	44	30	9	55
PPTDRAFT_00312	two-component system, OmpR family, sensor kinase	34.9055	1.31264	0.312309	0.999638	22	21	71	37	19	75
PPTDRAFT_00313	Serine protease, subtilisin family	4209.96	0.972199	0.668451	0.999638	2716	3001	11080	3006	2086	9303
PPTDRAFT_00314	manganese-dependent inorganic pyrophosphatase	1464.27	0.969467	0.672419	0.999638	1018	1091	3542	1132	762	2923
PPTDRAFT_00315	acetyl esterase	31.5506	0.860196	0.600165	0.999638	22	26	80	17	17	67
PPTDRAFT_00316	DNA-binding transcriptional regulator, MarR	55.837	1.01306	0.956327	0.999638	38	67	76	55	26	92
PPTDRAFT_00317	bifunctional non-homologous end joining protein	8.86048	0.948966	0.920926	0.999638	6	8	15	8	8	7
PPTDRAFT_00318	hypothetical protein	16.7408	0.62383	0.237124	0.999638	8	26	37	4	11	25
PPTDRAFT_00319	putative membrane protein	342.901	0.997119	0.978158	0.999638	204	318	724	261	231	552
PPTDRAFT_00320	carbohydrate ABC transporter substrate-binding	390.732	1.0762	0.491908	0.999638	257	281	881	407	180	758
PPTDRAFT_00321	carbohydrate ABC transporter membrane protein 1,	142.894	0.950072	0.720875	0.999638	98	113	341	107	77	276
PPTDRAFT_00322	carbohydrate ABC transporter membrane protein 2,	94.1614	0.995508	0.979469	0.999638	69	57	243	84	33	226
PPTDRAFT_00323	hyaluronoglucosaminidase	153.01	0.991783	0.95309	0.999638	107	103	387	120	72	336
PPTDRAFT_00324	Protein of unknown function (DUF4127)	123.237	1.08036	0.619352	0.999638	86	67	324	113	58	264
PPTDRAFT_00325	N-acylglucosamine-6-phosphate 2-epimerase	70.4749	1.01769	0.929133	0.999638	50	45	176	70	27	151
PPTDRAFT_00326	transcriptional regulator, RpiR family	61.8385	0.896632	0.602398	0.999638	49	43	156	45	27	133
PPTDRAFT_00327	glucokinase	26.2088	1.0834	0.807472	0.999638	17	8	93	27	9	58
PPTDRAFT_00328	Pyruvate/2-oxoglutarate dehydrogenase complex,	172.477	0.989855	0.939249	0.999638	123	114	436	152	73	371
PPTDRAFT_00329	tRNA_Cys_GCA	217.722	0.810698	0.136416	0.999638	192	263	242	269	113	148
PPTDRAFT_00330	tRNA_Arg_ACG	10184.6	1.28517	0.00280579	0.493976	1569	11196	18332	2146	12999	17173
PPTDRAFT_00331	tRNA_Pro_TGG	2.44959	0.740615	0.761067	0.999638	3	1	6	1	2	3
PPTDRAFT_00332	tRNA_Gly_TCC	177.374	0.986184	0.916913	0.999638	158	169	204	201	123	149
PPTDRAFT_00333	PAS domain S-box-containing protein	527.927	0.991607	0.926129	0.999638	369	495	958	416	355	811
PPTDRAFT_00334	two component transcriptional regulator, LuxR	139.083	0.926689	0.60081	0.999638	96	118	322	114	69	257
PPTDRAFT_00335	nitrogen regulatory protein A	27.7343	0.670367	0.194455	0.999638	25	20	83	18	14	38
PPTDRAFT_00336	CRP/FNR family transcriptional regulator,	189.039	0.835811	0.166319	0.999638	177	115	488	169	73	337
PPTDRAFT_00337	hypothetical protein	587.34	0.943001	0.532119	0.999638	360	758	778	356	487	712
PPTDRAFT_00338	raffinose/stachyose/melibiose transport system	5.382	1.11314	0.88018	0.999638	1	4	19	7	3	6
PPTDRAFT_00339	raffinose/stachyose/melibiose transport system	0.158361	0.461622	0.78293	NA	0	0	2	0	0	0
PPTDRAFT_00340	raffinose/stachyose/melibiose transport system	49.3768	0.984914	0.948122	0.999638	38	36	105	37	34	79
PPTDRAFT_00341	two-component system, sensor histidine kinase	13.8426	1.12381	0.788507	0.999638	7	8	40	12	10	22
PPTDRAFT_00342	two-component system, response regulator YesN	10.8616	0.802317	0.649756	0.999638	6	14	20	12	6	9
PPTDRAFT_00343	DNA-binding transcriptional regulator, LysR	20.1553	1.29256	0.496084	0.999638	8	12	55	23	14	30
PPTDRAFT_00344	4-hydroxy-3-polyprenylbenzoate decarboxylase	0.602902	2.71645	0.630531	NA	1	0	0	1	0	2
PPTDRAFT_00345	UbiD family decarboxylase	3.56088	4.82267	0.0853339	0.999638	2	0	3	5	2	14
PPTDRAFT_00346	hypothetical protein	0.305988	2.11469	0.790801	NA	0	0	0	0	1	0
PPTDRAFT_00347	hypothetical protein	11.2206	1.1029	0.840423	0.999638	7	6	28	12	9	12
PPTDRAFT_00348	CubicO group peptidase, beta-lactamase class C	28.7076	1.18882	0.556827	0.999638	19	22	53	28	16	57
PPTDRAFT_00349	Ig-like domain (group 2)	3024.64	0.931928	0.289654	0.999638	2168	2676	6382	2362	1741	5122
PPTDRAFT_00350	L-serine dehydratase	41.1549	1.48328	0.113641	0.999638	32	23	55	59	24	66
PPTDRAFT_00351	L-serine dehydratase	23.415	1.67844	0.126826	0.999638	20	11	28	26	13	58
PPTDRAFT_00354	hypothetical protein	51.9715	0.901146	0.642461	0.999638	36	44	125	42	24	99
PPTDRAFT_00355	oligopeptide/dipeptide ABC transporter,	33.6959	0.883249	0.650207	0.999638	23	29	81	25	20	54
PPTDRAFT_00356	peptide/nickel transport system ATP-binding	13.9128	0.830791	0.66199	0.999638	10	9	43	13	5	25
PPTDRAFT_00357	peptide/nickel transport system permease protein	14.7703	0.890237	0.790385	0.999638	8	6	59	15	2	38
PPTDRAFT_00358	peptide/nickel transport system permease protein	17.3095	0.589714	0.171386	0.999638	22	10	48	15	4	25
PPTDRAFT_00359	peptide/nickel transport system	47.7536	0.985997	0.951351	0.999638	35	39	99	40	27	84
PPTDRAFT_00360	DNA-binding transcriptional regulator, LysR	7.17393	1.26725	0.690853	0.999638	6	6	8	9	2	17
PPTDRAFT_00361	putative glutamine transport system permease	1.8238	0.355763	0.377731	0.999638	2	2	6	1	0	3
PPTDRAFT_00362	amino acid ABC transporter membrane protein 1,	2.88794	0.616923	0.631399	0.999638	3	3	2	7	0	1
PPTDRAFT_00363	putative glutamine transport system	11.1185	0.976755	0.962161	0.999638	9	7	18	20	6	6
PPTDRAFT_00364	putative glutamine transport system ATP-binding	9.11377	0.977702	0.966711	0.999638	14	2	15	12	4	9
PPTDRAFT_00365	hypothetical protein	306.222	1.02659	0.809346	0.999638	246	199	665	323	146	532
PPTDRAFT_00366	sortase A	0.934848	3.72802	0.416477	0.999638	0	0	2	1	1	3
PPTDRAFT_00367	LPXTG-motif cell wall anchor domain-containing	17.871	0.908207	0.796602	0.999638	15	12	43	17	6	37
PPTDRAFT_00368	Transposase	42.9164	0.740707	0.222902	0.999638	45	37	86	34	19	62
PPTDRAFT_00369	Transposase DDE domain-containing protein	126.382	0.900136	0.484967	0.999638	91	117	268	101	68	211
PPTDRAFT_00370	GEMM cis-regulatory element	31.6921	1.07992	0.802225	0.999638	34	17	52	22	23	54
PPTDRAFT_00371	AraC-type DNA-binding protein	147.072	1.00642	0.965159	0.999638	103	138	257	99	107	241
PPTDRAFT_00372	Uncharacterized membrane-anchored protein YjiN,	95.6152	1.02371	0.891224	0.999638	76	62	213	83	51	182
PPTDRAFT_00373	Pyrimidine dimer DNA glycosylase /DNA-(apurinic	54.3074	0.90728	0.655343	0.999638	41	49	111	48	29	84
PPTDRAFT_00374	Nitroreductase	96.6387	0.898399	0.531718	0.999638	66	81	238	75	43	195
PPTDRAFT_00375	transcriptional regulator, HxlR family	10.9581	0.658692	0.396885	0.999638	8	9	34	3	5	26
PPTDRAFT_00376	Predicted glycosyl hydrolase	471.036	0.967942	0.731976	0.999638	370	258	1277	439	181	991
PPTDRAFT_00377	Uncharacterized protein YcnI	211.502	1.08927	0.508096	0.999638	116	175	464	159	157	354
PPTDRAFT_00378	copper transport protein	120.722	1.03506	0.823062	0.999638	65	120	245	84	80	221
PPTDRAFT_00379	hypothetical protein	74.3832	0.785097	0.207509	0.999638	59	92	106	65	49	62
PPTDRAFT_00380	diguanylate cyclase (GGDEF) domain-containing	260.085	1.01102	0.924272	0.999638	161	227	557	175	170	492
PPTDRAFT_00381	hypothetical protein	1376.03	0.954484	0.566394	0.999638	1350	1104	1908	1810	704	1363
PPTDRAFT_00382	hypothetical protein	91.1592	1.04247	0.818437	0.999638	66	60	207	106	44	145
PPTDRAFT_00383	MFS transporter, DHA1 family,	25.2916	0.896206	0.730961	0.999638	22	18	56	17	16	42
PPTDRAFT_00384	DNA-binding transcriptional regulator, FrmR	257.647	1.08413	0.478154	0.999638	201	226	384	270	160	360
PPTDRAFT_00385	copper chaperone	471.684	1.0041	0.967919	0.999638	345	486	691	501	283	580
PPTDRAFT_00386	Cu+-exporting ATPase	95.9916	1.1122	0.536285	0.999638	68	62	210	97	54	170
PPTDRAFT_00387	FMN reductase (NADPH)	357.614	1.15497	0.194858	0.999638	244	209	838	320	213	703
PPTDRAFT_00388	TatD DNase family protein	28.5715	1.06598	0.83679	0.999638	23	15	61	46	8	45
PPTDRAFT_00389	ABC-type nitrate/sulfonate/bicarbonate transport	14.1671	1.28328	0.556786	0.999638	13	8	21	11	10	29
PPTDRAFT_00390	ABC-type nitrate/sulfonate/bicarbonate transport	33.7098	0.904919	0.733248	0.999638	26	24	75	32	25	33
PPTDRAFT_00391	uncharacterized protein, MTH1187 family	24.0094	0.838388	0.619964	0.999638	28	17	39	11	18	36
PPTDRAFT_00392	ABC-type nitrate/sulfonate/bicarbonate transport	61.7906	0.804264	0.290393	0.999638	63	50	117	60	30	76
PPTDRAFT_00394	General stress protein 26	41.4587	1.07224	0.782738	0.999638	28	35	80	30	23	92
PPTDRAFT_00395	2',3'-cyclic-nucleotide 2'-phosphodiesterase /	1611.01	0.983438	0.823513	0.999638	1201	1043	3991	1550	652	3294
PPTDRAFT_00396	EAL domain, c-di-GMP-specific phosphodiesterase	293.444	0.89516	0.310116	0.999638	247	273	518	280	159	394
PPTDRAFT_00397	hypothetical protein	12.7799	0.875217	0.759748	0.999638	14	9	22	15	5	17
PPTDRAFT_00398	oligo-1,6-glucosidase	10.4297	0.766779	0.587186	0.999638	10	9	21	5	7	16
PPTDRAFT_00399	hypothetical protein	996.123	0.957233	0.588551	0.999638	725	1032	1631	847	620	1426
PPTDRAFT_00400	peptidoglycan-N-acetylmuramic acid deacetylase	6.78476	1.18718	0.775623	0.999638	2	7	16	5	4	15
PPTDRAFT_00401	D-methionine transport system ATP-binding	1785.9	1.01439	0.849055	0.999638	1406	1374	3453	1905	872	2938
PPTDRAFT_00402	D-methionine transport system permease protein	742.506	0.921042	0.341648	0.999638	540	498	2008	649	329	1408
PPTDRAFT_00403	S-layer homology domain-containing protein	234.93	0.91025	0.427349	0.999638	171	201	526	179	124	427
PPTDRAFT_00404	Putative regulator of cell autolysis	100.232	0.983035	0.917957	0.999638	67	83	224	84	55	181
PPTDRAFT_00405	Two-component response regulator, SAPR family,	313.629	1.16239	0.198988	0.999638	194	257	571	349	197	466
PPTDRAFT_00406	Glycosidase	12.0299	1.09985	0.835788	0.999638	13	8	16	14	4	24
PPTDRAFT_00407	DNA-binding response regulator, OmpR family,	9.00303	0.876838	0.803818	0.999638	4	9	24	8	6	10
PPTDRAFT_00408	Signal transduction histidine kinase	11.1583	1.33824	0.541081	0.999638	5	7	27	12	4	31
PPTDRAFT_00409	ABC-2 type transport system ATP-binding protein	9.7251	0.52503	0.222188	0.999638	8	10	30	8	1	17
PPTDRAFT_00410	hypothetical protein	3.49245	0.910669	0.91122	0.999638	1	4	10	4	1	6
PPTDRAFT_00411	hypothetical protein	9.92991	0.838038	0.718142	0.999638	8	9	21	9	5	14
PPTDRAFT_00412	L-lactate dehydrogenase	264.871	0.947577	0.635378	0.999638	213	226	504	256	136	413
PPTDRAFT_00413	MerR HTH family regulatory protein	32.8562	1.00479	0.986379	0.999638	21	31	66	28	16	65
PPTDRAFT_00414	serine/threonine protein kinase	14.9465	1.48753	0.329936	0.999638	9	7	31	17	9	32
PPTDRAFT_00415	hypothetical protein	7.3131	1.07163	0.903767	0.999638	8	6	7	9	4	8
PPTDRAFT_00416	gluconate kinase, FGGY family (EC 2.7.1.12)	57.5542	1.05764	0.795659	0.999638	32	41	152	47	32	116
PPTDRAFT_00417	GntR family transcriptional regulator, gluconate	64.3789	0.825914	0.366978	0.999638	58	72	96	62	28	86
PPTDRAFT_00418	methionyl aminopeptidase	633.768	0.977285	0.791536	0.999638	472	451	1487	540	324	1195
PPTDRAFT_00419	tRNA_Asn_GTT	0.518287	0.206018	0.470687	NA	1	1	1	0	0	0
PPTDRAFT_00420	tRNA_Ser_GGA	9945.52	1.08244	0.647185	0.999638	4917	11599	13333	8078	9734	8613
PPTDRAFT_00421	tRNA_Glu_TTC	5.47866	0.512586	0.323861	0.999638	8	5	10	5	1	6
PPTDRAFT_00422	tRNA_Val_TAC	211.673	1.18895	0.217224	0.999638	147	191	266	302	123	236
PPTDRAFT_00423	tRNA_Met_CAT	5.69258	0.731651	0.647062	0.999638	9	5	3	5	4	2
PPTDRAFT_00424	tRNA_Asp_GTC	65.4086	0.847133	0.43403	0.999638	55	59	118	45	52	71
PPTDRAFT_00425	tRNA_Thr_TGT	275.731	0.936676	0.586938	0.999638	198	268	507	286	148	368
PPTDRAFT_00426	tRNA_Tyr_GTA	127.514	0.807428	0.186002	0.999638	105	156	171	139	67	110
PPTDRAFT_00427	tRNA_Lys_TTT	3100.25	1.21276	0.0197624	0.999638	2127	2858	4000	3751	1944	4177
PPTDRAFT_00428	tRNA_Leu_TAG	3593.76	1.14209	0.399954	0.999638	3025	4100	2428	4391	2410	2980
PPTDRAFT_00429	tRNA_Pro_TGG	15.2434	0.341714	0.016688	0.999638	26	22	13	5	7	6
PPTDRAFT_00430	tRNA_Gly_TCC	243.238	1.03582	0.785484	0.999638	77	306	404	71	267	358
PPTDRAFT_00431	hypothetical protein	1.13189	0.248921	0.374035	0.999638	1	3	1	1	0	0
PPTDRAFT_00432	Uncharacterized membrane protein YeiB	5.30068	0.848782	0.810965	0.999638	5	3	11	4	5	4
PPTDRAFT_00433	Predicted carboxypeptidase	11.1791	1.10817	0.828284	0.999638	10	8	18	8	6	26
PPTDRAFT_00434	transcriptional attenuator, LytR family	2.01101	0.346006	0.364884	0.999638	2	3	3	2	1	0
PPTDRAFT_00435	hypothetical protein	0.574008	0.909183	0.963679	NA	0	1	1	0	0	3
PPTDRAFT_00436	hypothetical protein	1.03695	0.344635	0.518104	0.999638	2	0	5	0	0	2
PPTDRAFT_00437	Predicted acyltransferases	0.306704	1.13754	0.963598	NA	0	1	0	0	0	1
PPTDRAFT_00438	hypothetical protein	49.0685	0.790804	0.35361	0.999638	31	66	89	47	19	67
PPTDRAFT_00439	Signal transduction histidine kinase	33.3308	1.10306	0.724056	0.999638	19	39	47	27	23	52
PPTDRAFT_00440	hypothetical protein	3.24732	0.683471	0.659029	0.999638	2	3	10	1	2	6
PPTDRAFT_00441	Membrane protein CcdC involved in cytochrome C	166.253	0.970957	0.83103	0.999638	100	124	448	131	87	324
PPTDRAFT_00442	disulfide bond formation protein DsbB	87.0089	0.889494	0.529189	0.999638	64	68	209	50	56	159
PPTDRAFT_00443	Nitroreductase	2100.86	0.963155	0.621551	0.999638	1288	2042	4241	1284	1474	3682
PPTDRAFT_00444	phosphatidylglycerol lysyltransferase	200.721	1.02174	0.863249	0.999638	153	158	394	187	108	351
PPTDRAFT_00445	Predicted ATPase	312.214	1.1374	0.23622	0.999638	227	166	753	315	142	671
PPTDRAFT_00446	Predicted transcriptional regulator YdeE,	226.013	1.06098	0.640439	0.999638	161	132	572	200	122	438
PPTDRAFT_00447	MFS transporter, DHA1 family, multidrug	881.104	0.945331	0.494041	0.999638	646	718	1943	805	437	1520
PPTDRAFT_00448	6-phosphogluconolactonase	30.28	1.40198	0.239816	0.999638	19	22	47	32	19	61
PPTDRAFT_00449	transcriptional regulator, ArsR family	258.507	1.00258	0.981904	0.999638	163	226	556	195	160	466
PPTDRAFT_00450	hypothetical protein	190.702	0.921825	0.522243	0.999638	167	168	328	178	107	265
PPTDRAFT_00451	Predicted acyltransferase	36.3907	1.21248	0.472405	0.999638	35	17	63	44	20	58
PPTDRAFT_00452	hypothetical protein	11.876	1.36114	0.513757	0.999638	6	10	18	20	4	21
PPTDRAFT_00453	NAD(P)H-hydrate epimerase	23.0394	0.701317	0.285772	0.999638	21	26	44	16	10	34
PPTDRAFT_00454	hypothetical protein	1.76056	1.3486	0.815337	0.999638	0	2	2	3	2	0
PPTDRAFT_00455	phosphonoacetaldehyde hydrolase (EC 3.11.1.1)	4.77348	0.735073	0.688174	0.999638	3	2	19	5	0	13
PPTDRAFT_00456	methyl-accepting chemotaxis protein	696.843	0.906208	0.250412	0.999638	532	672	1293	534	434	1039
PPTDRAFT_00457	ribonucleoside-diphosphate reductase beta chain	188.832	0.86438	0.266226	0.999638	186	123	414	191	86	271
PPTDRAFT_00458	ribonucleoside-diphosphate reductase alpha chain	129.258	1.00044	0.997635	0.999638	90	96	300	117	66	239
PPTDRAFT_00459	uncharacterized protein, MTH1187 family	151.475	0.926973	0.588484	0.999638	124	149	239	125	101	195
PPTDRAFT_00460	tRNA_Thr_CGT	2263.88	1.64371	8.28371e-08	3.43137e-05	823	1884	3262	1999	2373	3360
PPTDRAFT_00461	hypothetical protein	0.440546	1.31125	0.913443	NA	0	0	2	0	0	3
PPTDRAFT_00462	Uncharacterized membrane protein YcaP, DUF421	21.574	1.02107	0.953084	0.999638	8	23	52	20	13	32
PPTDRAFT_00463	Rubrerythrin	1.89455	2.11777	0.529324	0.999638	0	4	1	2	1	3
PPTDRAFT_00464	hypothetical protein	273.588	0.970927	0.805594	0.999638	163	311	476	178	178	477
PPTDRAFT_00465	hypothetical protein	16.5855	1.28036	0.549225	0.999638	4	13	49	17	8	36
PPTDRAFT_00466	hypothetical protein	119.52	1.01727	0.918258	0.999638	113	78	196	145	75	123
PPTDRAFT_00467	Uncharacterized conserved protein	2.61623	2.8756	0.296929	0.999638	0	2	3	4	3	3
PPTDRAFT_00468	hypothetical protein	0	#VALUE!	NA	NA	0	0	0	0	0	0
PPTDRAFT_00469	hypothetical protein	0.47923	2.07474	0.747657	NA	0	0	1	0	1	1
PPTDRAFT_00470	hypothetical protein	0	#VALUE!	NA	NA	0	0	0	0	0	0
PPTDRAFT_00471	AloR1 receptor	53.809	1.08777	0.706446	0.999638	31	49	100	48	41	73
AloP1_peptide	AloP1 peptide	313.112	2.37727	6.42081e-14	3.84178e-11	158	195	221	486	259	506
PPTDRAFT_00472	transcriptional regulator, HxlR family	8.02245	0.86872	0.804982	0.999638	7	3	26	4	3	22
PPTDRAFT_00473	NAD(P)-dependent dehydrogenase, short-chain	123.492	0.909392	0.540966	0.999638	87	105	288	94	57	250
PPTDRAFT_00474	AloR2 receptor	26.6199	1.15131	0.650978	0.999638	15	32	32	28	18	33
PPTDRAFT_00475	AloP2 peptide	653.991	3.24328	2.72739e-28	4.89567e-25	237	299	443	1235	517	1179
PPTDRAFT_00476	Predicted ester cyclase	37.116	1.15991	0.57709	0.999638	27	25	70	29	28	65
PPTDRAFT_00477	DNA-binding transcriptional regulator, MerR	606.055	1.08113	0.391884	0.999638	475	556	826	695	371	749
PPTDRAFT_00478	enoyl-[acyl-carrier protein] reductase II	13.6477	1.29821	0.562821	0.999638	15	3	26	16	9	19
PPTDRAFT_00479	arginase	44.1537	0.935804	0.786195	0.999638	31	37	95	31	32	65
PPTDRAFT_00480	Arabinose efflux permease	6.51563	0.895811	0.864017	0.999638	3	6	16	1	4	20
PPTDRAFT_00481	hypothetical protein	53.3645	0.993289	0.977042	0.999638	61	37	47	99	20	34
PPTDRAFT_00482	YmaF family protein	1.22561	1.3702	0.821912	0.999638	1	0	4	1	1	2
PPTDRAFT_00483	transcriptional regulator, AraC family	28.9997	0.811847	0.487105	0.999638	19	31	67	21	12	55
PPTDRAFT_00484	NADP-dependent 3-hydroxy acid dehydrogenase YdfG	3.50696	1.98741	0.431414	0.999638	0	3	8	4	3	6
PPTDRAFT_00485	protein FrlC	1.87041	1.88584	0.600369	0.999638	0	3	1	4	1	1
PPTDRAFT_00486	fructoselysine transporter, APC superfamily	0.320526	1.23525	0.940198	NA	1	0	0	0	0	1
PPTDRAFT_00487	Fructoselysine-6-P-deglycase FrlB with	16.0904	1.19869	0.645694	0.999638	10	9	39	19	7	33
PPTDRAFT_00488	fructoselysine 6-kinase	2.23015	1.46184	0.717033	0.999638	1	2	3	1	1	9
PPTDRAFT_00489	GntR family transcriptional regulator, frlABCD	190.688	1.15815	0.256225	0.999638	107	167	358	166	136	316
PPTDRAFT_00490	hypothetical protein	75.1676	0.97873	0.911601	0.999638	56	69	131	86	39	99
PPTDRAFT_00491	Acyltransferase family protein	1175.24	0.991362	0.915829	0.999638	803	1247	1888	938	758	1809
PPTDRAFT_00492	SPRY domain-containing protein	1039.46	0.933277	0.395846	0.999638	761	1166	1551	818	697	1372
PPTDRAFT_00493	hypothetical protein	10.8719	1.0362	0.941541	0.999638	14	7	11	16	3	15
PPTDRAFT_00494	protein of unknown function (DUF2935)	38.6009	1.06391	0.810902	0.999638	24	42	60	33	24	63
PPTDRAFT_00495	ribosomal-protein-alanine N-acetyltransferase	82.2641	1.10172	0.611077	0.999638	82	48	140	79	42	156
PPTDRAFT_00496	Dienelactone hydrolase	35.5284	1.09931	0.727741	0.999638	35	21	61	34	18	68
PPTDRAFT_00497	hypothetical protein	14.8108	0.593154	0.205455	0.999638	15	13	40	9	5	24
PPTDRAFT_00498	transcriptional regulator, ArsR family	65.0332	1.19088	0.403218	0.999638	40	42	143	59	46	112
PPTDRAFT_00499	NADH-FMN oxidoreductase RutF, flavin reductase	12.7154	1.34941	0.514894	0.999638	2	13	32	8	8	32
PPTDRAFT_00500	O-acetylhomoserine (thiol)-lyase	2602.88	1.02666	0.699795	0.999638	1867	1594	6629	2328	1172	5520
PPTDRAFT_00501	NADPH-dependent 2,4-dienoyl-CoA reductase,	72.3528	0.877336	0.506913	0.999638	63	37	209	56	27	158
PPTDRAFT_00502	PhnB protein	1.49564	1.80467	0.680642	0.999638	0	0	7	4	0	2
PPTDRAFT_00503	hypothetical protein	926.599	1.01155	0.907045	0.999638	661	1034	1232	990	545	1130
PPTDRAFT_00504	hypothetical protein	189.495	1.0747	0.595864	0.999638	167	114	357	224	106	261
PPTDRAFT_00505	hypothetical protein	27.8416	1.83302	0.0493074	0.999638	15	14	39	42	21	43
PPTDRAFT_00506	BsrC	1.06653	0.37432	0.554895	0.999638	2	2	0	1	0	0
PPTDRAFT_00507	DNA-binding transcriptional regulator, MarR	1.92239	1.02882	0.979732	0.999638	2	2	1	3	1	1
PPTDRAFT_00508	Epoxyqueuosine reductase QueG (queuosine	1.65762	1.60375	0.706848	0.999638	1	0	5	3	0	5
PPTDRAFT_00509	HD-GYP domain	203.735	1.07439	0.563199	0.999638	132	183	367	170	143	320
PPTDRAFT_00510	two-component system, chemotaxis family, sensor	130.708	1.03799	0.802083	0.999638	95	101	265	111	80	227
PPTDRAFT_00511	Uncharacterized conserved protein YbjT, contains	104.382	1.07916	0.642748	0.999638	92	69	189	106	55	182
PPTDRAFT_00512	protein of unknown function (DUF4179)	13.4877	1.60187	0.283621	0.999638	10	4	27	13	6	42
PPTDRAFT_00513	RNA polymerase sigma-70 factor, ECF subfamily	4.01989	1.69546	0.529273	0.999638	7	0	4	5	2	6
PPTDRAFT_00514	2-iminobutanoate/2-iminopropanoate deaminase	571.342	0.993291	0.940829	0.999638	367	485	1255	398	359	1073
PPTDRAFT_00515	UDP-N-acetylglucosamine-N-acetylmuramylpentapeptide N-acetylglucosamine transferase	37.6576	1.15873	0.586977	0.999638	33	18	74	46	23	51
PPTDRAFT_00516	hypothetical protein	6.92508	0.560398	0.378208	0.999638	4	17	6	2	2	10
PPTDRAFT_00517	bile acid:Na+ symporter, BASS family	144.74	0.914954	0.542176	0.999638	134	105	295	126	68	257
PPTDRAFT_00518	2,4-dienoyl-CoA reductase	284.544	0.998818	0.991516	0.999638	217	190	666	262	142	526
PPTDRAFT_00519	ribosomal-protein-alanine N-acetyltransferase	38.2595	0.916648	0.735425	0.999638	36	26	78	41	18	55
PPTDRAFT_00520	two-component system, response regulator YesN	12.0949	1.27467	0.588984	0.999638	11	8	16	14	6	23
PPTDRAFT_00521	two-component system, sensor histidine kinase	70.9793	1.07238	0.741062	0.999638	58	60	107	45	52	130
PPTDRAFT_00522	raffinose/stachyose/melibiose transport system	6.23777	1.1852	0.808003	0.999638	9	0	15	4	4	11
PPTDRAFT_00523	carbohydrate ABC transporter membrane protein 2,	5.1363	0.780138	0.718336	0.999638	5	4	11	6	1	9
PPTDRAFT_00524	raffinose/stachyose/melibiose transport system	11.0339	0.784678	0.614712	0.999638	11	8	24	13	2	20
PPTDRAFT_00525	Dihydrofolate reductase	9.54753	0.608024	0.337562	0.999638	7	7	36	7	2	18
PPTDRAFT_00526	Predicted DNA-binding transcriptional regulator	4.29042	1.26269	0.781941	0.999638	0	3	17	7	2	4
PPTDRAFT_00527	Superfamily II DNA or RNA helicase, SNF2 family	191.867	0.979169	0.873703	0.999638	160	132	412	187	75	391
PPTDRAFT_00528	hypothetical protein	74.5994	0.91065	0.622833	0.999638	61	59	159	59	43	121
PPTDRAFT_00529	D-alanyl-D-alanine carboxypeptidase	361.68	0.88137	0.218341	0.999638	298	281	823	312	162	648
PPTDRAFT_00530	hypothetical protein	30.1528	1.29545	0.382192	0.999638	24	12	66	29	12	83
PPTDRAFT_00531	Glutathionylspermidine synthase	160.15	0.976839	0.86907	0.999638	155	75	388	157	63	314
PPTDRAFT_00532	putative membrane protein	185.793	0.957262	0.734311	0.999638	157	139	374	186	94	290
PPTDRAFT_00533	Predicted dehydrogenase	27.2996	1.23744	0.494194	0.999638	15	21	52	36	15	42
PPTDRAFT_00534	drug resistance transporter, EmrB/QacA subfamily	43.816	1.19515	0.478424	0.999638	26	28	98	39	33	72
PPTDRAFT_00535	DNA-binding transcriptional regulator, MarR	46.6985	1.0576	0.812516	0.999638	34	33	99	38	30	83
PPTDRAFT_00536	transcriptional regulator, TetR family	73.2798	0.946798	0.78038	0.999638	42	73	154	58	52	98
PPTDRAFT_00537	Predicted arabinose efflux permease, MFS family	14.1505	0.83133	0.658972	0.999638	14	10	28	18	6	15
PPTDRAFT_00538	Protein of unknown function (DUF3995)	0.0791806	0.610884	0.861243	NA	0	0	1	0	0	0
PPTDRAFT_00540	threonyl-tRNA synthetase	883.71	1.01436	0.877023	0.999638	570	553	2422	590	488	1965
PPTDRAFT_00541	putative GTP pyrophosphokinase	470.337	1.03658	0.70979	0.999638	316	381	975	363	311	819
PPTDRAFT_00542	S-ribosylhomocysteine lyase /quorum-sensing	8905.92	0.946589	0.389773	0.999638	7392	7160	17482	8077	4610	14815
PPTDRAFT_00543	NAD(P)-dependent dehydrogenase, short-chain	5829.27	0.944907	0.396406	0.999638	4790	4622	11761	5296	2847	10227
PPTDRAFT_00544	D-methionine transport system substrate-binding	10274	0.944446	0.39392	0.999638	8965	8240	19091	9887	4997	16894
PPTDRAFT_00545	AraC-type DNA-binding protein	81.1971	1.1669	0.396593	0.999638	56	77	106	86	59	101
PPTDRAFT_00546	alpha-galactosidase	158.687	0.89294	0.416812	0.999638	111	125	406	124	68	326
PPTDRAFT_00547	two-component system, sensor histidine kinase	8.96836	1.23743	0.699042	0.999638	7	3	21	4	8	20
PPTDRAFT_00548	two-component system, response regulator YesN	5.43452	0.69507	0.621183	0.999638	9	2	9	5	0	14
PPTDRAFT_00549	carbohydrate ABC transporter membrane protein 1,	0.814485	0.853971	0.926342	0.999638	2	0	1	1	0	1
PPTDRAFT_00550	putative aldouronate transport system permease	1.17253	0.589474	0.737697	0.999638	0	3	2	0	0	4
PPTDRAFT_00551	carbohydrate ABC transporter substrate-binding	14.645	1.01756	0.96724	0.999638	6	15	33	15	10	17
PPTDRAFT_00552	mannan endo-1,4-beta-mannosidase	3.69308	2.73182	0.24553	0.999638	0	3	5	3	5	6
PPTDRAFT_00553	Acetyltransferases	93.7627	0.953191	0.790028	0.999638	60	88	203	82	41	185
PPTDRAFT_00554	SMI1 / KNR4 family (SUKH-1)	50.1476	0.782021	0.28211	0.999638	42	37	136	39	19	94
PPTDRAFT_00555	uncharacterized oxidoreductase	95.1554	0.888076	0.508895	0.999638	65	90	203	49	62	181
PPTDRAFT_00556	DNA helicase-2 / ATP-dependent DNA helicase PcrA	54.5177	0.940111	0.778465	0.999638	39	45	123	50	25	99
PPTDRAFT_00557	hypothetical protein	98.8733	0.890106	0.48671	0.999638	88	69	223	94	45	161
PPTDRAFT_00558	Predicted transcriptional regulators	68.2832	0.873918	0.51041	0.999638	69	46	143	60	25	134
PPTDRAFT_00559	Isopentenyldiphosphate isomerase	34.4338	1.11752	0.687209	0.999638	26	19	78	41	11	77
PPTDRAFT_00560	hypothetical protein	194.33	1.08007	0.545807	0.999638	158	110	430	216	81	379
PPTDRAFT_00561	probable phosphoglycerate mutase	224.183	0.98192	0.879588	0.999638	169	143	561	202	97	461
PPTDRAFT_00562	large conductance mechanosensitive channel	318.787	0.954811	0.670626	0.999638	229	326	544	244	203	494
PPTDRAFT_00563	alkylhydroperoxidase AhpD family core	32.677	1.25611	0.418879	0.999638	20	22	64	41	18	55
PPTDRAFT_00564	RNA polymerase sigma-70 factor, ECF subfamily	87.2769	0.823464	0.272323	0.999638	76	76	183	68	47	130
PPTDRAFT_00565	Uncharacterized membrane protein	30.013	1.07029	0.819732	0.999638	17	20	80	30	10	73
PPTDRAFT_00566	MOSC domain-containing protein YiiM	102.67	0.998376	0.992669	0.999638	72	65	263	67	66	201
PPTDRAFT_00567	hypothetical protein	13.6939	0.84291	0.6869	0.999638	11	11	32	15	5	21
PPTDRAFT_00568	processive 1,2-diacylglycerol	14.9328	0.915682	0.83841	0.999638	7	7	63	10	8	27
PPTDRAFT_00569	CubicO group peptidase, beta-lactamase class C	28.6585	0.822284	0.512903	0.999638	28	20	65	28	9	52
PPTDRAFT_00570	hypothetical protein	1371.92	0.984329	0.84041	0.999638	1146	1331	1967	1293	837	1850
PPTDRAFT_00571	methionyl aminopeptidase	5.43849	0.821185	0.766403	0.999638	4	4	15	6	2	8
PPTDRAFT_00572	L-amino acid N-acyltransferase YncA	23.341	0.90128	0.765269	0.999638	15	24	40	33	12	19
PPTDRAFT_00573	hypothetical protein	2.01011	0.634372	0.675008	0.999638	2	2	3	1	2	1
PPTDRAFT_00574	protein of unknown function (DUF1858)	0.320526	1.23525	0.940198	NA	1	0	0	0	0	1
PPTDRAFT_00575	hypothetical protein	38.9066	0.768334	0.310079	0.999638	25	52	71	21	24	56
PPTDRAFT_00576	GntR family transcriptional regulator	8.62618	0.885054	0.816915	0.999638	6	10	15	8	4	13
PPTDRAFT_00577	ABC-2 type transport system ATP-binding protein	16.2584	1.20798	0.635969	0.999638	13	6	40	18	9	29
PPTDRAFT_00578	ABC-2 type transport system ATP-binding protein	18.0709	1.02852	0.93911	0.999638	15	12	36	20	10	26
PPTDRAFT_00579	ABC-2 type transport system permease protein	76.0597	0.848328	0.382794	0.999638	63	55	192	64	31	142
PPTDRAFT_00580	transcriptional regulator, TetR family	128.386	1.07767	0.632324	0.999638	86	117	211	85	105	204
PPTDRAFT_00581	2-keto-4-pentenoate	30.514	1.22466	0.51305	0.999638	22	19	53	48	7	65
PPTDRAFT_00582	Glyoxylase, beta-lactamase superfamily II	11.8867	2.1706	0.121267	0.999638	2	4	35	13	8	31
PPTDRAFT_00583	Pimeloyl-ACP methyl ester carboxylesterase	145.375	0.949218	0.714763	0.999638	105	146	252	132	88	200
PPTDRAFT_00584	Sugar kinase of the NBD/HSP70 family, may	225.723	1.04995	0.698054	0.999638	156	210	388	166	148	409
PPTDRAFT_00585	purine-nucleoside phosphorylase	16.8824	0.629874	0.25332	0.999638	20	14	37	8	6	33
PPTDRAFT_00586	Threonine/homoserine efflux transporter RhtA	7.83756	0.75901	0.634842	0.999638	8	5	19	3	3	21
PPTDRAFT_00587	tRNA(Arg) A34 adenosine deaminase TadA	13.2697	0.681599	0.393717	0.999638	11	15	26	17	3	15
PPTDRAFT_00588	phosphopentomutase	4.71151	1.59285	0.512373	0.999638	3	2	9	5	3	11
PPTDRAFT_00589	MFS transporter, NHS family, xanthosine permease	22.8544	0.92314	0.815327	0.999638	18	22	39	11	16	43
PPTDRAFT_00590	Predicted oxidoreductase	14.5843	1.24352	0.596243	0.999638	9	14	21	15	8	28
PPTDRAFT_00591	Aldo/keto reductase	9.55623	1.1363	0.80845	0.999638	9	3	23	6	7	19
PPTDRAFT_00592	DNA-binding transcriptional regulator, MerR	83.4846	0.995654	0.981076	0.999638	47	92	154	55	54	151
PPTDRAFT_00593	NADPH:quinone reductase	20.5116	0.604009	0.150993	0.999638	17	25	47	15	8	25
PPTDRAFT_00594	hypothetical protein	98.7155	0.883277	0.464713	0.999638	60	142	113	59	86	91
PPTDRAFT_00595	NAD(P)-dependent dehydrogenase, short-chain	14.9656	1.62843	0.233764	0.999638	6	9	30	11	12	38
PPTDRAFT_00596	DNA-binding transcriptional regulator, MarR	56.2762	0.92279	0.709332	0.999638	39	55	113	44	31	96
PPTDRAFT_00597	Predicted Na+-dependent transporter	63.489	0.919505	0.691702	0.999638	55	51	126	59	24	125
PPTDRAFT_00598	Transcriptional regulator containing an amidase	8.54897	0.895685	0.853672	0.999638	4	11	12	17	1	9
PPTDRAFT_00599	Sugar-binding cellulase-like	4.03854	1.73703	0.525093	0.999638	2	0	12	9	0	10
PPTDRAFT_00600	Beta-galactosidase	28.042	1.14142	0.672474	0.999638	20	26	42	21	15	65
PPTDRAFT_00601	mannan endo-1,4-beta-mannosidase	1.83917	1.5834	0.702435	0.999638	0	2	3	0	2	6
PPTDRAFT_00602	5'(3')-deoxyribonucleotidase	294.331	0.966714	0.775474	0.999638	208	331	424	300	176	350
PPTDRAFT_00603	Putative GTP cyclohydrolase 1 type 2, NIF3	20.1122	1.4993	0.257326	0.999638	10	21	21	24	14	31
PPTDRAFT_00604	Beta-galactosidase/beta-glucuronidase	3.81866	1.33532	0.739858	0.999638	6	0	7	3	1	11
PPTDRAFT_00605	beta-galactosidase	30.7773	0.9248	0.785297	0.999638	29	19	69	28	13	58
PPTDRAFT_00606	transcriptional regulator, ArsR family	68.2453	1.14061	0.514467	0.999638	39	65	122	64	39	127
PPTDRAFT_00607	Sugar phosphate permease	118.793	0.876008	0.431921	0.999638	103	107	211	145	44	162
PPTDRAFT_00608	16S rRNA. Bacterial SSU	1.06288	0.598107	0.737355	0.999638	0	2	3	0	1	1
PPTDRAFT_00609	DNA-binding transcriptional regulator, MarR	380.295	0.988391	0.908526	0.999638	281	404	550	339	251	495
PPTDRAFT_00610	Uncharacterized OsmC-related protein	7.88973	0.810629	0.705206	0.999638	9	5	15	7	5	8
PPTDRAFT_00611	dihydrolipoamide dehydrogenase	37.7975	0.908707	0.713086	0.999638	29	29	88	38	17	61
PPTDRAFT_00612	Fucose permease	8.45468	1.29515	0.647291	0.999638	8	2	17	10	7	9
PPTDRAFT_00613	maltose O-acetyltransferase	23.0602	1.15904	0.650717	0.999638	15	20	38	24	15	35
PPTDRAFT_00614	transcriptional regulator, XRE family with cupin	37.8279	0.889746	0.663441	0.999638	28	43	59	20	27	60
PPTDRAFT_00615	Threonine/homoserine/homoserine lactone efflux	13.6297	0.642523	0.314421	0.999638	6	20	35	4	7	25
PPTDRAFT_00616	trehalose-6-phosphate hydrolase	13.4116	0.765709	0.542513	0.999638	13	7	40	8	7	23
PPTDRAFT_00617	PTS system trehalose-specific IIB component, Glc	8.60752	1.14272	0.802549	0.999638	7	4	20	9	3	21
PPTDRAFT_00618	GntR family transcriptional regulator, trehalose	367.327	0.958799	0.727116	0.999638	293	419	471	287	231	530
PPTDRAFT_00619	spore germination protein	13.837	0.789246	0.577432	0.999638	16	15	15	11	8	14
PPTDRAFT_00620	spore germination protein	3.91014	2.75349	0.233195	0.999638	2	0	8	4	4	9
PPTDRAFT_00621	spore germination protein	2.10052	1.03593	0.975386	0.999638	0	2	6	0	3	3
PPTDRAFT_00622	nitrite reductase (NADH) large subunit	20.8525	0.560327	0.130992	0.999638	33	6	64	14	7	24
PPTDRAFT_00623	nitrite reductase (NADH) small subunit	8.68322	1.07311	0.907015	0.999638	11	0	25	13	3	9
PPTDRAFT_00624	BclB C-terminal domain-containing protein	9.27492	1.1211	0.827045	0.999638	7	5	18	15	5	9
PPTDRAFT_00625	S-layer homology domain-containing protein	830.187	1.06345	0.457923	0.999638	632	456	2065	784	366	1775
PPTDRAFT_00626	Phage Tail Collar Domain	198.14	1.21944	0.119824	0.999638	145	122	379	231	107	352
PPTDRAFT_00627	spore germination protein	2.31682	2.02002	0.523364	0.999638	1	0	5	1	4	3
PPTDRAFT_00628	spore germination protein	0.840253	0.712375	0.850328	0.999638	1	0	3	0	0	4
PPTDRAFT_00629	spore germination protein	7.25988	1.37646	0.59679	0.999638	3	4	15	6	9	7
PPTDRAFT_00630	DNA-binding transcriptional regulator, PadR	126.006	0.989936	0.947472	0.999638	99	134	170	109	83	167
PPTDRAFT_00631	phenolic acid decarboxylase	76.9801	0.892235	0.566913	0.999638	58	71	158	80	28	134
PPTDRAFT_00632	hypothetical protein	11.7203	1.11095	0.825566	0.999638	10	3	35	8	5	32
PPTDRAFT_00633	transcriptional regulator, HxlR family	254.187	0.95401	0.689607	0.999638	185	269	371	188	206	290
PPTDRAFT_00634	glucosylceramidase	3.77464	1.08292	0.92182	0.999638	1	4	10	4	1	9
PPTDRAFT_00635	DNA-binding response regulator, OmpR family,	31.7089	0.83035	0.546078	0.999638	36	18	64	23	23	35
PPTDRAFT_00636	HAMP domain-containing protein	42.1787	1.01002	0.967563	0.999638	39	30	74	45	21	66
PPTDRAFT_00637	CDP-diacylglycerol--serine	18.3308	1.12073	0.760854	0.999638	7	19	41	15	10	38
PPTDRAFT_00638	membrane protein DedA, SNARE-associated domain	20.7182	0.873465	0.699947	0.999638	24	9	47	25	6	33
PPTDRAFT_00639	protein PsiE	117.487	1.08254	0.609514	0.999638	96	91	196	114	71	188
PPTDRAFT_00640	Predicted PurR-regulated permease PerM	355.276	0.912341	0.393776	0.999638	272	306	738	249	220	595
PPTDRAFT_00641	Uncharacterized membrane protein	12.712	1.27649	0.579885	0.999638	5	14	18	8	13	18
PPTDRAFT_00642	NAD(P)H-dependent FMN reductase	26.1447	1.15358	0.642376	0.999638	15	23	49	20	18	50
PPTDRAFT_00643	ketopantoate reductase (EC 1.1.1.169)	298.097	1.18392	0.126646	0.999638	193	162	741	274	146	691
PPTDRAFT_00644	pan motif	161.328	0.893597	0.421413	0.999638	159	151	216	193	78	169
PPTDRAFT_00645	Predicted DNA-binding protein, MmcQ/YjbR family	96.9998	0.949912	0.760442	0.999638	65	107	155	81	68	119
PPTDRAFT_00646	putative NAD(P)H nitroreductase	94.7991	0.931418	0.690848	0.999638	84	70	194	69	51	180
PPTDRAFT_00647	glyoxalase family protein	99.1989	1.18774	0.312049	0.999638	69	59	215	96	59	190
PPTDRAFT_00648	Superfamily II DNA or RNA helicase, SNF2 family	123.71	0.918811	0.58856	0.999638	106	96	257	109	53	236
PPTDRAFT_00649	macrolide phosphotransferase	467.168	1.32185	0.010436	0.999638	293	295	888	356	344	1015
PPTDRAFT_00650	Zn-dependent protease (includes SpoIVFB)	333.651	1.11427	0.304567	0.999638	222	288	586	327	208	537
PPTDRAFT_00651	AraC-type DNA-binding protein	10.8916	1.81887	0.226549	0.999638	3	6	24	15	7	22
PPTDRAFT_00652	glycoside/pentoside/hexuronide:cation symporter,	3.82305	0.497716	0.388721	0.999638	6	2	10	3	1	4
PPTDRAFT_00653	beta-galactosidase	43.4149	0.854435	0.52036	0.999638	35	44	81	34	22	70
PPTDRAFT_00654	two-component system, sensor histidine kinase	16.1221	1.36788	0.420909	0.999638	11	9	30	19	9	32
PPTDRAFT_00655	two-component system, response regulator YesN	4.60532	1.57048	0.538432	0.999638	5	1	7	5	3	9
PPTDRAFT_00656	raffinose/stachyose/melibiose transport system	2.01355	0.821141	0.861325	0.999638	1	1	8	2	0	6
PPTDRAFT_00657	carbohydrate ABC transporter membrane protein 1,	4.97557	3.07867	0.141394	0.999638	3	0	7	11	3	8
PPTDRAFT_00658	raffinose/stachyose/melibiose transport system	1.77563	5.0252	0.202857	0.999638	0	0	4	2	2	5
PPTDRAFT_00659	mannan endo-1,4-beta-mannosidase	54.8393	1.00738	0.973495	0.999638	34	45	125	51	32	88
PPTDRAFT_00660	hypothetical protein	6.4258	0.889162	0.846288	0.999638	5	6	13	5	3	12
PPTDRAFT_00661	hypothetical protein	14.0776	1.08429	0.845675	0.999638	13	8	27	16	6	26
PPTDRAFT_00662	Concanavalin A-like lectin/glucanases	9.90627	1.34191	0.56261	0.999638	6	4	25	6	7	26
PPTDRAFT_00663	Uncharacterized protein YjbI, contains	61.1723	0.984142	0.938446	0.999638	44	58	104	56	42	77
PPTDRAFT_00664	protein of unknown function (DUF1259)	173.36	0.972672	0.840243	0.999638	119	184	291	151	100	268
PPTDRAFT_00665	GntR family transcriptional regulator / MocR	33.659	0.822738	0.476787	0.999638	28	33	65	23	20	50
PPTDRAFT_00666	Pyridoxamine 5'-phosphate oxidase	1.01384	2.41371	0.596831	0.999638	0	0	3	0	1	5
PPTDRAFT_00667	transcriptional regulator, TetR family	6.37788	1.63709	0.453324	0.999638	7	1	10	4	5	16
PPTDRAFT_00668	hypothetical protein	280.162	1.14384	0.242474	0.999638	190	185	605	250	174	527
PPTDRAFT_00669	hypothetical protein	740.316	1.0669	0.439813	0.999638	521	725	1066	705	543	902
PPTDRAFT_00670	DNA-binding transcriptional regulator, MerR	8.84263	1.65799	0.357216	0.999638	2	6	20	11	7	14
PPTDRAFT_00671	Predicted arabinose efflux permease, MFS family	9.06144	0.886017	0.826965	0.999638	5	9	21	10	1	23
PPTDRAFT_00672	Nucleotide-binding universal stress protein,	4.37829	2.91938	0.184596	0.999638	3	0	6	4	5	10
PPTDRAFT_00673	Acyl-CoA reductase	23.4784	0.734407	0.358694	0.999638	23	18	57	13	10	47
PPTDRAFT_00674	NAD(P)-dependent dehydrogenase, short-chain	10.1564	0.889355	0.812669	0.999638	9	6	24	11	6	11
PPTDRAFT_00675	Uncharacterized conserved protein, DUF1330	4.10903	0.497384	0.401799	0.999638	4	3	11	0	4	5
PPTDRAFT_00676	hypothetical protein	7.20051	0.959785	0.945516	0.999638	2	5	29	4	4	15
PPTDRAFT_00677	Predicted DNA-binding transcriptional regulator	21.3616	1.06609	0.851542	0.999638	13	19	41	23	13	30
PPTDRAFT_00678	NAD(P)H dehydrogenase (quinone)	21.3996	1.09548	0.790513	0.999638	10	19	48	11	16	46
PPTDRAFT_00679	transcriptional pleiotropic regulator of	69.0552	0.778254	0.212456	0.999638	48	91	116	39	44	94
PPTDRAFT_00680	hypothetical protein	80.5411	0.854472	0.395658	0.999638	62	78	165	70	38	128
PPTDRAFT_00681	DNA-binding transcriptional regulator, MerR	203.185	0.905607	0.442525	0.999638	190	180	330	214	93	287
PPTDRAFT_00682	DNA-binding transcriptional regulator, MerR	17.4806	0.785258	0.525134	0.999638	14	10	57	14	6	34
PPTDRAFT_00683	hypothetical protein	171.924	0.973607	0.849491	0.999638	106	140	406	98	119	331
PPTDRAFT_00684	GAF domain-containing protein	192.106	0.950155	0.688741	0.999638	106	196	413	116	131	338
PPTDRAFT_00685	hypothetical protein	43.5379	0.687737	0.128853	0.999638	29	64	76	29	25	45
PPTDRAFT_00686	ribosomal-protein-alanine N-acetyltransferase	28.5132	1.09561	0.763873	0.999638	23	19	54	35	9	60
PPTDRAFT_00687	energy-coupling factor transport system permease	9.94602	1.09157	0.863492	0.999638	9	7	16	9	3	27
PPTDRAFT_00688	energy-coupling factor transport system	190.285	1.15992	0.260564	0.999638	191	112	277	251	80	314
PPTDRAFT_00689	energy-coupling factor transport system	62.2473	0.901275	0.62374	0.999638	76	40	97	71	22	93
PPTDRAFT_00690	drug resistance transporter, EmrB/QacA subfamily	98.6163	0.893461	0.503528	0.999638	91	64	224	100	43	156
PPTDRAFT_00691	levansucrase	9.96673	1.52953	0.390912	0.999638	8	7	9	10	9	14
PPTDRAFT_00692	levanbiose-producing levanase	9.67636	1.27481	0.6267	0.999638	6	7	17	13	5	16
PPTDRAFT_00693	MarR family transcriptional regulator, 2-MHQ and	18.0363	0.544502	0.123279	0.999638	19	6	78	11	3	35
PPTDRAFT_00694	hypothetical protein	41.6221	1.09855	0.736763	0.999638	35	52	33	38	23	62
PPTDRAFT_00695	similar to spore coat protein	3.9894	0.284262	0.137839	0.999638	4	3	19	3	0	4
PPTDRAFT_00696	similar to spore coat protein	16.9439	1.05444	0.889986	0.999638	7	20	30	10	15	24
PPTDRAFT_00697	amino acid/polyamine/organocation transporter,	1.88279	1.43618	0.74117	0.999638	2	1	2	2	1	4
PPTDRAFT_00698	Putative threonine efflux protein	0.252423	0.880188	0.96329	NA	0	0	2	0	0	1
PPTDRAFT_00699	Fructoselysine-6-P-deglycase FrlB with	2.0492	0.269585	0.246913	0.999638	4	1	7	1	0	2
PPTDRAFT_00700	Sugar or nucleoside kinase, ribokinase family	1.69664	0.97916	0.986372	0.999638	1	1	4	1	0	8
PPTDRAFT_00701	transcriptional regulator, GntR family	66.3173	1.10843	0.606921	0.999638	48	52	116	68	44	95
PPTDRAFT_00702	hypothetical protein	1.79746	0.764295	0.813841	0.999638	2	1	3	1	2	1
PPTDRAFT_00703	Uncharacterized membrane protein YfcC, ion	4.75088	2.96342	0.143971	0.999638	1	2	6	5	6	9
PPTDRAFT_00704	ribonuclease J	6.99092	1.02762	0.964225	0.999638	2	7	18	6	6	7
PPTDRAFT_00705	hypothetical protein	274.458	1.06517	0.572987	0.999638	175	236	539	234	181	452
PPTDRAFT_00706	His Kinase A (phospho-acceptor)	345.343	1.05242	0.637772	0.999638	276	249	671	291	200	646
PPTDRAFT_00707	putative bacilliredoxin, YphP/YqiW family	589.553	1.05948	0.519716	0.999638	516	354	1170	711	256	984
PPTDRAFT_00708	NAD+ synthase	400.156	0.974484	0.794769	0.999638	304	271	962	361	194	746
PPTDRAFT_00709	Lysophospholipase, alpha-beta hydrolase	323.326	0.960089	0.730871	0.999638	216	194	938	196	169	747
PPTDRAFT_00710	holo-[acyl-carrier protein] synthase	37.6658	1.03533	0.89544	0.999638	31	36	52	44	18	54
PPTDRAFT_00711	A/G-specific DNA-adenine glycosylase	63.5881	0.934388	0.743904	0.999638	63	46	116	63	26	112
PPTDRAFT_00712	Transcriptional regulator containing an amidase	57.1215	0.763963	0.209925	0.999638	42	68	109	36	34	78
PPTDRAFT_00713	alpha-galactosidase	6.19877	1.2798	0.690643	0.999638	3	5	12	4	5	13
PPTDRAFT_00714	PTS system, sucrose-specific IIC component	9.18704	1.03934	0.940557	0.999638	9	4	21	8	5	17
PPTDRAFT_00715	Uncharacterized damage-inducible protein DinB	268.056	0.981598	0.868902	0.999638	156	298	469	186	195	399
PPTDRAFT_00716	superoxide dismutase, Fe-Mn family	5953.48	1.0078	0.925862	0.999638	3468	4222	15948	3536	3806	12514
PPTDRAFT_00717	Ribosomal protein S18 acetylase RimI	2110.14	1.02796	0.69891	0.999638	1483	2061	3436	1863	1358	3164
PPTDRAFT_00718	signal peptidase I	117.911	1.09506	0.562438	0.999638	90	81	232	115	72	194
PPTDRAFT_00719	RNase HI (EC 3.1.26.4)	28.92	1.15084	0.645512	0.999638	23	13	69	27	18	52
PPTDRAFT_00720	epoxyqueuosine reductase	189.935	0.975948	0.853034	0.999638	143	151	400	187	85	346
PPTDRAFT_00721	hypothetical protein	517.779	1.03335	0.744622	0.999638	387	363	1107	596	238	853
PPTDRAFT_00722	GTP cyclohydrolase I	639.941	1.06844	0.478342	0.999638	421	457	1464	527	404	1155
PPTDRAFT_00723	octanoyl-[GcvH]:protein N-octanoyltransferase	33.5821	1.01397	0.963489	0.999638	28	29	51	46	8	63
PPTDRAFT_00724	superoxide dismutase, Fe-Mn family	1.89062	1.27801	0.84292	0.999638	2	0	3	0	3	3
PPTDRAFT_00725	Alpha/beta hydrolase family protein	153.121	0.842975	0.220907	0.999638	133	115	359	133	72	245
PPTDRAFT_00726	transcriptional regulator, IclR family	59.7551	0.887443	0.585161	0.999638	71	44	89	62	23	91
PPTDRAFT_00728	hydroxymethylpyrimidine synthase	10.4586	1.31424	0.587286	0.999638	12	3	16	11	8	14
PPTDRAFT_00729	hypothetical protein	120.57	0.946592	0.729789	0.999638	87	139	165	123	75	129
PPTDRAFT_00730	Uncharacterized membrane-anchored protein YitT,	345.692	1.85428	2.66421e-09	1.43468e-06	193	193	458	417	260	708
PPTDRAFT_00731	aconitate hydratase	312.789	0.847278	0.126687	0.999638	313	228	641	288	139	488
PPTDRAFT_00732	Putative amidase domain-containing protein	89.869	1.3037	0.161071	0.999638	52	50	205	107	53	158
PPTDRAFT_00733	D-alanine-D-alanine ligase	243.085	0.910112	0.432897	0.999638	185	190	568	213	102	473
PPTDRAFT_00734	hypothetical protein	46.2085	1.09358	0.707573	0.999638	27	28	126	33	23	116
PPTDRAFT_00735	UV-damage endonuclease	157.292	0.966904	0.808925	0.999638	122	89	423	135	63	346
PPTDRAFT_00736	myo-inositol-1(or 4)-monophosphatase	295.557	0.983628	0.882425	0.999638	232	176	749	268	137	573
PPTDRAFT_00737	hypothetical protein	162.112	1.02923	0.836305	0.999638	96	143	354	142	90	294
PPTDRAFT_00738	two-component system, sensor histidine kinase	9.13012	0.925811	0.879964	0.999638	6	9	19	7	5	16
PPTDRAFT_00739	two-component system, response regulator YesN	2.25052	0.477985	0.50112	0.999638	1	3	8	1	0	6
PPTDRAFT_00740	carbohydrate ABC transporter substrate-binding	9.56503	1.35506	0.541934	0.999638	6	7	15	10	7	16
PPTDRAFT_00741	multiple sugar transport system permease protein	0.975155	1.13999	0.935597	0.999638	0	2	1	2	0	1
PPTDRAFT_00742	carbohydrate ABC transporter membrane protein 2,	1.65124	1.52394	0.729816	0.999638	0	2	3	1	2	2
PPTDRAFT_00743	Lysophospholipase L1	0.690813	0.373292	0.619443	NA	1	0	2	0	1	0
PPTDRAFT_00744	unsaturated rhamnogalacturonyl hydrolase	1.32912	0.489086	0.599764	0.999638	1	1	5	0	1	2
PPTDRAFT_00745	hypothetical protein	50.985	1.11771	0.626208	0.999638	42	39	71	63	35	53
PPTDRAFT_00746	Predicted permeases	44.9814	1.25323	0.364557	0.999638	23	34	93	53	26	77
PPTDRAFT_00747	glutamate-1-semialdehyde 2,1-aminomutase	98.1316	0.936248	0.695673	0.999638	97	72	170	113	42	141
PPTDRAFT_00748	transcriptional attenuator, LytR family	779.121	1.04163	0.619373	0.999638	557	669	1424	723	484	1209
PPTDRAFT_00749	ABC-2 type transport system ATP-binding protein	81.9589	1.12854	0.517392	0.999638	68	41	181	92	41	145
PPTDRAFT_00750	ABC-2 type transport system permease protein	48.8504	0.864779	0.535939	0.999638	45	30	120	46	24	72
PPTDRAFT_00751	ABC-2 type transport system permease protein	51.3577	0.89616	0.632459	0.999638	46	30	131	40	24	99
PPTDRAFT_00752	peroxiredoxin Q/BCP	149.793	1.02747	0.84941	0.999638	97	137	294	121	85	283
PPTDRAFT_00753	spore germination protein KB	3.9234	0.368249	0.239964	0.999638	3	6	10	0	2	6
PPTDRAFT_00754	hypothetical protein	0.573292	2.613	0.647414	NA	0	0	1	0	1	2
PPTDRAFT_00755	spore germination protein KB	5.37531	1.36742	0.649975	0.999638	6	1	10	5	4	9
PPTDRAFT_00756	spore germination protein KC	4.74506	2.13483	0.302755	0.999638	1	3	8	8	2	12
PPTDRAFT_00757	spore germination protein KA	5.69565	0.749496	0.662546	0.999638	3	4	22	4	3	8
PPTDRAFT_00758	membrane protein DedA, SNARE-associated domain	44.2875	0.914865	0.718029	0.999638	26	41	105	37	28	62
PPTDRAFT_00759	GMP synthase (glutamine-hydrolysing)	1852.77	0.936412	0.361194	0.999638	1405	1418	4254	1522	996	3241
PPTDRAFT_00760	dipeptidase E	33.9188	0.673877	0.169655	0.999638	29	38	74	26	10	58
PPTDRAFT_00761	Predicted dehydrogenase	21.8807	0.890351	0.731221	0.999638	15	15	63	16	10	45
PPTDRAFT_00762	DNA-binding transcriptional regulator, LysR	25.9688	0.956603	0.887733	0.999638	16	26	54	18	13	55
PPTDRAFT_00763	hypothetical protein	10.8499	0.802617	0.656869	0.999638	9	7	28	4	9	17
PPTDRAFT_00764	DNA-binding transcriptional regulator, MarR	100.902	0.848282	0.322258	0.999638	101	88	169	94	52	131
PPTDRAFT_00765	hypothetical protein	81.629	1.00665	0.97206	0.999638	73	60	143	66	55	125
PPTDRAFT_00766	putative MFS transporter, AGZA family,	594.712	1.11739	0.210408	0.999638	347	423	1423	486	332	1280
PPTDRAFT_00767	16S rRNA. Bacterial SSU	2.88139	1.0178	0.986354	0.999638	0	2	12	5	0	6
PPTDRAFT_00768	3-oxoacyl-[acyl-carrier-protein] synthase-3	68.0513	0.94799	0.78891	0.999638	46	42	197	55	27	154
PPTDRAFT_00769	DNA topoisomerase-3	465.219	0.966759	0.722153	0.999638	373	306	1099	415	202	943
PPTDRAFT_00770	hypothetical protein	156.265	0.955592	0.744864	0.999638	101	154	313	115	92	277
PPTDRAFT_00771	L-asparaginase	76.4199	1.01585	0.937804	0.999638	88	35	113	138	16	98
PPTDRAFT_00772	hypothetical protein	1.26535	1.88623	0.64719	0.999638	0	1	2	1	2	1
PPTDRAFT_00773	Protein of unknown function (DUF4023)	1.1938	3.74059	0.400564	0.999638	0	0	2	4	0	3
PPTDRAFT_00774	Uncharacterized membrane protein YsdA, DUF1294	570.829	1.01184	0.894306	0.999638	407	459	1186	510	319	994
PPTDRAFT_00775	Nucleotide-binding universal stress protein,	481.452	1.06347	0.511332	0.999638	306	414	963	377	298	911
PPTDRAFT_00777	5-(carboxyamino)imidazole ribonucleotide mutase	88.3001	0.917138	0.642194	0.999638	67	81	175	57	47	180
PPTDRAFT_00778	5-(carboxyamino)imidazole ribonucleotide	233.53	1.16166	0.21755	0.999638	143	134	599	201	122	532
PPTDRAFT_00779	adenylosuccinate lyase	316.796	1.09291	0.419704	0.999638	233	185	749	265	153	730
PPTDRAFT_00780	hypothetical protein	0.385884	0.628804	0.850168	NA	0	1	1	0	0	1
PPTDRAFT_00781	phosphoribosylaminoimidazole-succinocarboxamide	182.249	1.25611	0.0910673	0.999638	123	84	448	186	87	419
PPTDRAFT_00782	phosphoribosylformylglycinamidine synthase	88.9371	0.991261	0.960531	0.999638	80	52	194	100	31	171
PPTDRAFT_00783	phosphoribosylformylglycinamidine synthase	260.822	1.12214	0.313543	0.999638	171	152	656	231	122	606
PPTDRAFT_00784	phosphoribosylformylglycinamidine synthase	696.314	1.16376	0.0857215	0.999638	461	384	1716	575	344	1710
PPTDRAFT_00785	amidophosphoribosyltransferase	502.739	1.12482	0.205768	0.999638	364	314	1103	504	257	985
PPTDRAFT_00786	hypothetical protein	34.5632	1.26765	0.384386	0.999638	22	19	78	38	15	81
PPTDRAFT_00787	phosphoribosylformylglycinamidine cyclo-ligase	304.772	0.908442	0.388488	0.999638	232	210	784	244	120	668
PPTDRAFT_00788	phosphoribosylglycinamide formyltransferase-1	144.883	0.946424	0.702556	0.999638	107	108	344	130	62	287
PPTDRAFT_00789	phosphoribosylaminoimidazolecarboxamide	591.261	1.08357	0.366186	0.999638	398	350	1509	538	265	1327
PPTDRAFT_00790	phosphoribosylamine--glycine ligase	665.319	1.08128	0.394091	0.999638	452	399	1688	606	343	1333
PPTDRAFT_00791	transcriptional regulator, TetR family	2201.42	0.973207	0.694375	0.999638	1637	1916	4266	1838	1310	3599
PPTDRAFT_00792	amino acid ABC transporter substrate-binding	5261.17	0.975214	0.713561	0.999638	3844	4915	9547	4262	3157	8728
PPTDRAFT_00793	cystine transport system permease protein	321.639	1.07366	0.501026	0.999638	233	213	720	306	159	641
PPTDRAFT_00794	amino acid ABC transporter ATP-binding protein,	285.453	0.931962	0.536092	0.999638	249	168	709	243	123	572
PPTDRAFT_00795	putative redox protein	1661.54	1.00476	0.952993	0.999638	1296	1600	2507	1768	937	2229
PPTDRAFT_00796	iron complex transport system permease protein	2.36961	4.14624	0.191777	0.999638	1	0	3	3	1	11
PPTDRAFT_00797	iron complex transport system permease protein	2.56691	0.539995	0.542825	0.999638	1	2	12	3	1	1
PPTDRAFT_00798	iron complex transport system substrate-binding	32.1585	1.11264	0.711641	0.999638	27	17	69	26	21	60
PPTDRAFT_00799	Response regulator of citrate/malate metabolism	27.6146	1.05439	0.864719	0.999638	20	16	67	24	19	43
PPTDRAFT_00800	Sensor histidine kinase regulating	41.9637	0.838847	0.486714	0.999638	39	25	107	44	18	59
PPTDRAFT_00801	Quinol monooxygenase YgiN	507.909	1.02159	0.835063	0.999638	380	320	1195	579	187	988
PPTDRAFT_00802	Aldo/keto reductase	736.45	0.994047	0.945388	0.999638	552	508	1720	586	391	1459
PPTDRAFT_00803	hypothetical protein	0	#VALUE!	NA	NA	0	0	0	0	0	0
PPTDRAFT_00804	Uncharacterized membrane protein	47.5167	1.04669	0.847881	0.999638	31	30	123	47	24	87
PPTDRAFT_00805	Predicted transcriptional regulators	39.5994	1.04519	0.861421	0.999638	30	32	71	44	22	57
PPTDRAFT_00806	phospholipase/carboxylesterase	41.3543	0.901896	0.683123	0.999638	42	29	80	36	18	75
PPTDRAFT_00807	small acid-soluble spore protein	36.7157	1.35632	0.257153	0.999638	23	23	66	52	17	68
PPTDRAFT_00808	L-arabinose-binding protein	3.13061	0.290303	0.190066	0.999638	6	3	6	2	0	3
PPTDRAFT_00809	arabinosaccharide transport system permease	2.92822	4.06153	0.157648	0.999638	1	0	5	4	2	10
PPTDRAFT_00810	L-arabinose ABC transporter membrane protein	5.75801	1.06076	0.930429	0.999638	1	7	16	4	2	15
PPTDRAFT_00811	L-threonine ammonia-lyase	440.696	0.929752	0.482187	0.999638	339	404	841	422	209	723
PPTDRAFT_00812	arabinan endo-1,5-alpha-L-arabinosidase	16.6875	1.06009	0.884936	0.999638	8	13	43	22	6	29
PPTDRAFT_00813	iron complex transport system permease protein	262.482	0.953852	0.706375	0.999638	206	247	415	314	147	280
PPTDRAFT_00814	iron complex transport system permease protein	22.8595	1.16047	0.654888	0.999638	16	22	32	18	15	43
PPTDRAFT_00815	iron complex transport system substrate-binding	289.09	0.959797	0.712526	0.999638	237	278	444	242	194	385
PPTDRAFT_00816	hypothetical protein	84.4196	1.08177	0.668452	0.999638	72	53	158	112	32	143
PPTDRAFT_00817	hypothetical protein	16.4084	0.596899	0.197501	0.999638	16	19	29	19	6	11
PPTDRAFT_00818	hypothetical protein	5167.22	0.994175	0.928964	0.999638	3775	4467	9980	4547	2900	8809
PPTDRAFT_00819	Aromatic ring-opening dioxygenase, catalytic	2799.68	0.998838	0.98628	0.999638	2069	2065	6228	2407	1502	5167
PPTDRAFT_00820	hypothetical protein	2.62246	1.39188	0.748454	0.999638	2	0	6	1	4	3
PPTDRAFT_00821	thiosulfate dehydrogenase [quinone] large	181.527	0.902841	0.455271	0.999638	133	136	453	162	97	281
PPTDRAFT_00822	Protein of unknown function (DUF3048)	160.786	0.98124	0.891348	0.999638	109	128	365	137	95	267
PPTDRAFT_00823	hypothetical protein	576.671	0.863307	0.098032	0.999638	447	561	1126	490	322	810
PPTDRAFT_00824	inorganic phosphate transporter, PiT family	554.788	1.07119	0.456005	0.999638	421	422	1025	588	326	830
PPTDRAFT_00825	amino acid ABC transporter substrate-binding	808.005	0.880751	0.133488	0.999638	662	682	1677	738	444	1121
PPTDRAFT_00826	amino acid ABC transporter ATP-binding protein,	288.987	0.851397	0.146071	0.999638	253	203	701	261	129	472
PPTDRAFT_00827	magnesium transporter	17.6005	0.839392	0.656817	0.999638	15	17	33	10	7	42
PPTDRAFT_00828	hypothetical protein	1.28533	6.97608	0.1957	0.999638	1	0	0	2	1	4
PPTDRAFT_00829	Trp operon repressor family	269.26	0.738516	0.0136567	0.999638	237	278	513	274	123	283
PPTDRAFT_00830	Sirohydrochlorin ferrochelatase	204.6	0.846439	0.214196	0.999638	128	206	472	165	125	267
PPTDRAFT_00831	diacylglycerol kinase (ATP)	132.789	0.881702	0.407163	0.999638	97	111	311	123	68	198
PPTDRAFT_00832	23S rRNA m(5)U-1939 methyltransferase (EC	109.662	1.05691	0.733154	0.999638	81	71	250	92	62	214
PPTDRAFT_00833	prevent-host-death family protein	899.472	1.00398	0.963423	0.999638	688	858	1405	959	513	1195
PPTDRAFT_00834	Type I restriction-modification system, DNA	525.827	0.992184	0.941388	0.999638	289	569	1030	442	301	877
PPTDRAFT_00835	addiction module toxin, RelE/StbE family	212.316	1.00081	0.994852	0.999638	130	265	284	164	157	267
PPTDRAFT_00836	hypothetical protein	115.62	1.06014	0.711024	0.999638	72	116	198	100	74	186
PPTDRAFT_00837	type I restriction enzyme, R subunit	464.747	0.952725	0.60691	0.999638	312	399	1045	367	254	847
PPTDRAFT_00838	Virulence protein RhuM family protein	81.4012	1.02497	0.89441	0.999638	64	69	142	88	38	136
PPTDRAFT_00839	type I restriction enzyme, S subunit	247.464	0.905443	0.39493	0.999638	203	176	588	204	118	457
PPTDRAFT_00840	type I restriction enzyme M protein	555.056	0.924233	0.410748	0.999638	402	519	1112	409	304	1016
PPTDRAFT_00841	tRNA-dihydrouridine synthase	76.092	1.02851	0.882285	0.999638	58	45	186	77	35	143
PPTDRAFT_00842	hypothetical protein	170.292	1.01903	0.88907	0.999638	141	144	281	151	105	265
PPTDRAFT_00843	transcriptional regulator, TetR family	211.995	0.905764	0.425989	0.999638	147	241	352	160	136	296
PPTDRAFT_00844	Imidazolonepropionase	18.0359	1.30688	0.479201	0.999638	15	7	38	17	11	38
PPTDRAFT_00845	AraC-type DNA-binding protein	19.7053	1.01783	0.961216	0.999638	9	21	44	17	9	40
PPTDRAFT_00846	unsaturated rhamnogalacturonyl hydrolase	2.98293	1.06353	0.947211	0.999638	1	1	14	3	1	6
PPTDRAFT_00847	beta-D-galactosyl-(1->4)-L-rhamnose	15.7407	1.40483	0.403596	0.999638	13	6	29	16	12	27
PPTDRAFT_00848	hypothetical protein	890.445	0.966183	0.680903	0.999638	748	846	1315	960	503	1088
PPTDRAFT_00849	Predicted DNA-binding transcriptional regulator	86.9534	0.878904	0.495635	0.999638	67	111	116	68	49	119
PPTDRAFT_00850	PhnB protein	15.6219	1.21243	0.624035	0.999638	13	12	20	17	11	21
PPTDRAFT_00851	Uncharacterized conserved protein YdiU, UPF0061	137.646	0.983083	0.907326	0.999638	110	92	314	125	71	245
PPTDRAFT_00852	NAD(P)-dependent dehydrogenase, short-chain	8.57217	1.59894	0.406959	0.999638	11	1	12	11	5	14
PPTDRAFT_00853	amino acid/polyamine/organocation transporter,	429.611	0.842535	0.078641	0.999638	328	330	1120	348	198	748
PPTDRAFT_00854	uncharacterized zinc-type alcohol	67.1285	0.876185	0.509485	0.999638	70	46	127	79	24	98
PPTDRAFT_00855	DNA-binding transcriptional regulator, MerR	53.1451	0.91684	0.710074	0.999638	35	54	95	24	46	81
PPTDRAFT_00856	hypothetical protein	905.59	0.978863	0.790384	0.999638	636	969	1393	754	619	1210
PPTDRAFT_00857	S-layer homology domain-containing protein	1720.76	1.03113	0.665732	0.999638	1040	1390	3992	1293	1014	3400
PPTDRAFT_00858	Nitroreductase family protein	82.284	1.09679	0.629439	0.999638	38	106	121	66	58	121
PPTDRAFT_00859	transcriptional regulator, HxlR family	169.563	1.08037	0.566059	0.999638	118	157	278	160	104	271
PPTDRAFT_00860	iron complex transport system substrate-binding	421.361	1.05694	0.566698	0.999638	257	410	748	316	307	673
PPTDRAFT_00861	homoserine kinase type II	63.7967	1.01405	0.946182	0.999638	47	64	100	50	40	106
PPTDRAFT_00862	Copper amine oxidase N-terminal	41.0553	0.847811	0.514539	0.999638	42	26	92	34	20	66
PPTDRAFT_00863	Formimidoyltetrahydrofolate cyclodeaminase (EC	594.838	1.01577	0.860233	0.999638	481	461	1120	544	335	1002
PPTDRAFT_00864	methylenetetrahydrofolate dehydrogenase (NADP+)	259.755	1.12953	0.297765	0.999638	178	177	552	214	161	516
PPTDRAFT_00865	pfl RNA	667.625	1.25389	0.0198558	0.999638	545	467	843	849	492	720
PPTDRAFT_00866	omega-6 fatty acid desaturase (delta-12	940.004	1.02859	0.738432	0.999638	605	630	2449	840	460	1873
PPTDRAFT_00867	two-component system, NarL family, sensor	540.132	1.03987	0.666786	0.999638	384	401	1167	512	280	993
PPTDRAFT_00868	two component transcriptional regulator, LuxR	714.796	1.06659	0.457394	0.999638	573	394	1686	714	325	1423
PPTDRAFT_00869	deoxyguanosine kinase	74.5979	0.917304	0.659163	0.999638	53	74	141	44	49	132
PPTDRAFT_00870	deoxyadenosine/deoxycytidine kinase	76.453	0.874176	0.475807	0.999638	59	55	198	59	38	138
PPTDRAFT_00871	Predicted dehydrogenase	640.721	1.0073	0.932571	0.999638	469	506	1331	552	360	1142
PPTDRAFT_00872	D-methionine transport system ATP-binding	2773.81	0.996807	0.961993	0.999638	2029	2110	6072	2438	1426	5203
PPTDRAFT_00873	D-methionine transport system permease protein	1109.08	1.09528	0.303452	0.999638	767	590	2941	1176	476	2232
PPTDRAFT_00874	D-methionine transport system substrate-binding	2502.6	1.00095	0.988784	0.999638	1961	1604	5875	2381	1107	4945
PPTDRAFT_00875	amidohydrolase	2805.27	1.01192	0.861636	0.999638	2277	1701	6481	2861	1133	5627
PPTDRAFT_00876	3',5'-cyclic AMP phosphodiesterase CpdA	63.9595	1.28484	0.22032	0.999638	40	34	148	61	32	156
PPTDRAFT_00877	tRNA-splicing ligase RtcB	73.4467	1.02791	0.887149	0.999638	76	44	118	92	39	88
PPTDRAFT_00878	shikimate dehydrogenase	15.7478	1.11563	0.790653	0.999638	8	13	35	21	5	31
PPTDRAFT_00879	Sugar phosphate permease	4.22344	0.454883	0.305124	0.999638	6	5	7	3	1	4
PPTDRAFT_00880	transcriptional regulator, LysR family	21.651	1.03911	0.910031	0.999638	12	18	52	19	11	43
PPTDRAFT_00881	Sugar phosphate permease	26.8297	0.661005	0.178226	0.999638	29	22	61	26	9	33
PPTDRAFT_00882	3-dehydroquinate dehydratase	159.575	0.98611	0.921164	0.999638	119	164	247	125	103	246
PPTDRAFT_00883	shikimate kinase	456.398	0.796943	0.0266734	0.999638	385	493	817	352	234	657
PPTDRAFT_00884	Pectate lyase	102.925	0.795143	0.191005	0.999638	68	121	209	52	59	185
PPTDRAFT_00885	Phosphotransferase enzyme family protein	36.3422	0.874335	0.60978	0.999638	26	40	65	28	22	51
PPTDRAFT_00886	Glycosyltransferase involved in cell wall	30.4645	0.915959	0.759297	0.999638	21	25	73	24	17	52
PPTDRAFT_00887	MFS transporter, DHA1 family, arabinose polymer	103.657	0.981219	0.908788	0.999638	71	74	258	91	53	192
PPTDRAFT_00888	cysteine synthase A	32.5078	0.942368	0.833125	0.999638	28	16	89	30	12	68
PPTDRAFT_00889	hypothetical protein	1789.98	0.897141	0.153498	0.999638	1296	1586	3956	1391	882	3340
PPTDRAFT_00890	major intracellular serine protease	206.464	0.909918	0.473457	0.999638	120	168	561	119	94	510
PPTDRAFT_00891	thiopeptide-type bacteriocin biosynthesis	274.681	1.02008	0.877217	0.999638	171	118	916	158	116	777
PPTDRAFT_00892	Lantibiotic modifying enzyme	90.3754	0.850171	0.417892	0.999638	82	46	250	50	31	248
PPTDRAFT_00893	hypothetical protein	52.797	0.816871	0.374053	0.999638	37	30	180	40	15	124
PPTDRAFT_00894	ATP-binding cassette, subfamily B, AbcA/BmrA	206.028	0.918092	0.503876	0.999638	141	150	547	156	83	469
PPTDRAFT_00895	accessory gene regulator B	68.4461	1.03397	0.868271	0.999638	24	64	188	34	43	159
PPTDRAFT_00896	hypothetical protein	92.2545	1.00472	0.979958	0.999638	43	74	266	79	47	175
PPTDRAFT_00897	two-component system, AgrA family, sensor	205.925	1.05528	0.670165	0.999638	112	140	569	138	114	477
PPTDRAFT_00898	two component transcriptional regulator, LytTR	125.062	0.895507	0.467142	0.999638	77	107	326	84	66	245
PPTDRAFT_00899	TraX protein	88.4412	0.982849	0.921989	0.999638	48	78	216	54	53	186
PPTDRAFT_00900	Predicted oxidoreductase	10.7259	1.29225	0.615082	0.999638	5	3	40	10	6	22
PPTDRAFT_00901	WYL domain-containing protein	32.5624	0.87927	0.648852	0.999638	22	31	74	22	15	68
PPTDRAFT_00902	Predicted DNA-binding transcriptional regulator	30.8265	1.24053	0.468556	0.999638	19	16	73	41	9	73
PPTDRAFT_00903	hypothetical protein	30.3759	1.25131	0.45493	0.999638	19	13	81	37	14	60
PPTDRAFT_00904	hypothetical protein	18.2256	0.899627	0.773794	0.999638	14	16	39	15	8	35
PPTDRAFT_00905	3' terminal RNA ribose 2'-O-methyltransferase	38.4678	1.12586	0.649389	0.999638	29	25	79	31	20	89
PPTDRAFT_00906	polynucleotide 3'-phosphatase/polynucleotide	87.6744	0.956691	0.807361	0.999638	77	55	200	71	39	185
PPTDRAFT_00907	TatD DNase family protein	39.3666	1.13442	0.631071	0.999638	36	20	79	34	20	87
PPTDRAFT_00909	energy-coupling factor transport system	5.10407	1.09582	0.905894	0.999638	9	0	9	3	4	6
PPTDRAFT_00910	energy-coupling factor transport system	11.7847	0.495878	0.137828	0.999638	16	12	23	5	5	14
PPTDRAFT_00911	energy-coupling factor transport system permease	5.88344	0.518077	0.309348	0.999638	7	5	15	3	3	6
PPTDRAFT_00912	D-methionine transport system ATP-binding	80.6549	1.1336	0.519113	0.999638	56	34	226	96	29	169
PPTDRAFT_00913	D-methionine transport system permease protein	40.8221	0.793029	0.373115	0.999638	26	30	133	36	14	74
PPTDRAFT_00914	D-methionine transport system substrate-binding	342.708	0.938011	0.572968	0.999638	258	316	660	262	177	652
PPTDRAFT_00915	hypothetical protein	28.2035	0.840511	0.579421	0.999638	19	25	65	27	19	27
PPTDRAFT_00916	protein of unknown function (DUF4132)	247.056	0.819478	0.0885543	0.999638	207	177	646	212	94	454
PPTDRAFT_00917	N-acetylglutamate synthase and related	36.1597	1.15012	0.608813	0.999638	24	33	59	36	17	75
PPTDRAFT_00918	Predicted dehydrogenase	66.261	1.03801	0.856585	0.999638	56	36	150	76	19	148
PPTDRAFT_00919	beta-glucosidase	6.97243	1.02672	0.964611	0.999638	4	4	21	8	3	12
PPTDRAFT_00920	glucosylceramidase	17.1771	0.664309	0.290751	0.999638	17	11	52	10	8	27
PPTDRAFT_00921	hypothetical protein	0.824275	0.365239	0.567509	0.999638	1	1	1	0	1	0
PPTDRAFT_00922	hypothetical protein	1.49326	3.86514	0.321952	0.999638	0	0	4	1	2	4
PPTDRAFT_00923	hypothetical protein	7.18183	0.714359	0.572125	0.999638	9	6	12	3	4	12
PPTDRAFT_00924	hypothetical protein	19.7567	1.24978	0.532961	0.999638	13	17	27	13	18	33
PPTDRAFT_00925	hypothetical protein	69.672	0.825231	0.339177	0.999638	43	90	128	49	39	101
PPTDRAFT_00926	hypothetical protein	0.603092	1.43009	0.871881	NA	1	0	0	2	0	0
PPTDRAFT_00927	Uncharacterized protein YqkB	389.145	0.936728	0.561889	0.999638	287	436	579	264	263	589
PPTDRAFT_00928	Uncharacterized SPBc2 prophage-derived protein	42.8577	0.806817	0.39363	0.999638	33	45	88	36	17	73
PPTDRAFT_00929	rhamnogalacturonan endolyase	9.27262	2.0878	0.179783	0.999638	2	4	21	16	4	22
PPTDRAFT_00930	hypothetical protein	0	#VALUE!	NA	NA	0	0	0	0	0	0
PPTDRAFT_00931	IseA DL-endopeptidase inhibitor	429.374	0.981501	0.846501	0.999638	338	325	897	412	211	750
PPTDRAFT_00932	hypothetical protein	1008.73	0.988528	0.887099	0.999638	758	1009	1582	884	631	1464
PPTDRAFT_00933	nitrite transporter NirC	102.244	1.06471	0.709969	0.999638	68	82	210	107	51	181
PPTDRAFT_00934	hypothetical protein	252.125	1.01737	0.883032	0.999638	185	198	509	217	160	404
PPTDRAFT_00935	WXG100 family type VII secretion target	29.9847	0.633124	0.115382	0.999638	30	29	67	23	14	33
PPTDRAFT_00936	[acyl-carrier-protein] S-malonyltransferase	157.663	0.841532	0.228647	0.999638	104	144	389	114	97	229
PPTDRAFT_00937	non-ribosomal peptide synthase domain	507.928	0.869889	0.14008	0.999638	342	395	1380	325	242	1084
PPTDRAFT_00938	Non-ribosomal peptide synthetase modules and	57.8339	1.1204	0.608975	0.999638	34	34	152	33	36	145
PPTDRAFT_00939	amino acid adenylation domain-containing protein	113.434	1.00225	0.989139	0.999638	75	74	297	69	63	265
PPTDRAFT_00940	hypothetical protein	1.79419	0.424095	0.475448	0.999638	1	2	7	0	1	3
PPTDRAFT_00941	non-ribosomal peptide synthase domain	55.524	0.895558	0.634908	0.999638	27	61	136	41	23	116
PPTDRAFT_00942	Non-ribosomal peptide synthetase modules and	62.4733	1.00714	0.973824	0.999638	36	36	190	32	36	155
PPTDRAFT_00943	non-ribosomal peptide synthase domain	474.505	1.00646	0.945216	0.999638	317	340	1166	376	239	1001
PPTDRAFT_00944	Predicted arabinose efflux permease, MFS family	180.306	1.04103	0.765757	0.999638	98	154	424	147	109	327
PPTDRAFT_00945	Putative adhesin	64.0513	1.09432	0.661569	0.999638	57	54	86	67	36	98
PPTDRAFT_00946	ABC-2 type transport system permease protein	7.55876	1.35475	0.595474	0.999638	3	6	14	8	7	9
PPTDRAFT_00947	ABC-2 type transport system ATP-binding protein	2.38692	1.74228	0.59316	0.999638	2	0	6	2	2	5
PPTDRAFT_00948	DNA-binding response regulator, NarL/FixJ	817.115	0.922718	0.335572	0.999638	509	902	1524	565	531	1281
PPTDRAFT_00949	tellurite resistance protein TerB	1686.78	1.22496	0.00971491	0.999638	1192	1285	2689	2009	953	2772
PPTDRAFT_00950	Stress response protein SCP2	1760.22	1.12224	0.132154	0.999638	1156	1284	3684	1366	1109	3584
PPTDRAFT_00951	tellurium resistance protein TerD	1459.03	1.13623	0.11647	0.999638	879	847	3835	1045	786	3603
PPTDRAFT_00952	tellurium resistance protein TerD	1202.89	1.05738	0.470314	0.999638	885	849	2571	1068	683	2214
PPTDRAFT_00953	tellurite resistance protein TerA	662.425	1.14153	0.128487	0.999638	425	353	1755	599	291	1598
PPTDRAFT_00954	integral membrane protein, YkoY family	1220.35	1.05228	0.510776	0.999638	964	987	2127	1204	667	2051
PPTDRAFT_00955	Citrate lyase beta subunit	86.0062	1.24251	0.232342	0.999638	60	51	175	91	36	208
PPTDRAFT_00956	TRSP domain C terminus to PRTase_2	162.031	1.05204	0.712176	0.999638	139	89	359	179	60	331
PPTDRAFT_00957	PELOTA RNA binding domain-containing protein	51.9494	1.30349	0.240164	0.999638	38	25	110	53	26	121
PPTDRAFT_00958	Hydroxymethylpyrimidine pyrophosphatase	38.799	0.999295	0.997863	0.999638	33	33	66	32	19	77
PPTDRAFT_00959	Carbamoylphosphate synthase large subunit (split	121.74	1.09066	0.57471	0.999638	88	69	297	121	48	278
PPTDRAFT_00960	hypothetical protein	158.262	0.897146	0.436894	0.999638	109	143	352	102	100	271
PPTDRAFT_00961	Uncharacterized conserved protein YaaN involved	710.326	0.94777	0.541549	0.999638	531	703	1231	630	405	1069
PPTDRAFT_00962	hypothetical protein	1.53141	1.42826	0.791252	0.999638	1	0	4	0	2	4
PPTDRAFT_00963	hypothetical protein	376.266	0.977844	0.831596	0.999638	247	301	872	260	243	680
PPTDRAFT_00964	TerF vWA domain-containing protein	745.712	0.989497	0.900702	0.999638	516	645	1530	581	432	1371
PPTDRAFT_00965	hypothetical protein	498.429	0.74129	0.00631532	0.969307	425	502	1057	303	239	867
PPTDRAFT_00966	protein of unknown function (DUF3899)	1734.59	1.02708	0.726677	0.999638	1064	988	5214	1345	782	4020
PPTDRAFT_00967	oligopeptide transport system substrate-binding	8848.33	0.95005	0.418817	0.999638	6567	5578	23634	7205	3873	18730
PPTDRAFT_00968	hypothetical protein	253.086	1.05725	0.645764	0.999638	155	134	760	227	100	595
PPTDRAFT_00969	peptide/nickel transport system permease protein	1333.18	0.95246	0.512449	0.999638	1010	999	3051	1111	663	2534
PPTDRAFT_00970	peptide/nickel transport system permease protein	3507.73	0.958646	0.537049	0.999638	2607	3306	6350	3151	2014	5336
PPTDRAFT_00971	polar amino acid transport system	23.8345	0.212127	1.54466e-05	0.00519873	27	36	76	7	4	16
PPTDRAFT_00972	amino acid ABC transporter membrane protein,	20.0441	0.261273	0.00043611	0.0978522	24	20	77	8	5	13
PPTDRAFT_00973	polar amino acid transport system ATP-binding	19.9172	0.354634	0.00778511	0.999638	26	13	76	6	7	21
PPTDRAFT_00974	AraC-type DNA-binding protein	118.113	1.28048	0.125644	0.999638	57	131	159	94	92	201
PPTDRAFT_00975	Threonine/homoserine efflux transporter RhtA	48.5507	1.28449	0.281236	0.999638	26	47	72	47	34	82
PPTDRAFT_00976	tRNA-binding protein	31.3451	0.988736	0.967944	0.999638	27	28	47	28	21	41
PPTDRAFT_00977	Uncharacterized damage-inducible protein DinB	407.909	1.00516	0.963651	0.999638	313	437	560	353	245	620
PPTDRAFT_00978	Permease of the drug/metabolite transporter	22.3205	0.955287	0.89292	0.999638	17	25	33	17	12	39
PPTDRAFT_00979	AraC-type DNA-binding protein	72.88	1.0245	0.899384	0.999638	50	75	110	55	56	100
PPTDRAFT_00980	multidrug efflux pump	6.95224	0.64893	0.490937	0.999638	6	7	15	1	4	16
PPTDRAFT_00981	transcriptional regulator, TetR family	54.3074	0.79072	0.325372	0.999638	40	49	135	48	14	115
PPTDRAFT_00982	Ig-like domain (group 4)	9.18166	1.21595	0.717105	0.999638	3	8	22	13	3	18
PPTDRAFT_00983	alpha-galactosidase	2.85727	1.53699	0.655937	0.999638	3	0	7	4	1	6
PPTDRAFT_00984	Copper amine oxidase N-terminal	142.05	0.979873	0.88694	0.999638	113	118	268	133	77	229
PPTDRAFT_00985	hypothetical protein	24.6398	1.2062	0.554408	0.999638	17	15	52	25	13	51
PPTDRAFT_00986	protein of unknown function (DUF4179)	13.4756	1.63366	0.262998	0.999638	4	11	24	16	10	24
PPTDRAFT_00987	RNA polymerase sigma-70 factor, ECF subfamily	1.90572	0.398569	0.42682	0.999638	4	1	4	1	0	3
PPTDRAFT_00988	hypothetical protein	8.31094	1.38065	0.550443	0.999638	5	4	19	8	5	19
PPTDRAFT_00989	transcriptional regulator, LacI family	55.0439	0.963254	0.866217	0.999638	35	56	102	55	33	71
PPTDRAFT_00990	carbohydrate ABC transporter membrane protein 1,	3.47955	0.707893	0.679743	0.999638	3	5	5	2	1	7
PPTDRAFT_00991	carbohydrate ABC transporter membrane protein 2,	0.252423	0.880188	0.96329	NA	0	0	2	0	0	1
PPTDRAFT_00992	putative aldouronate transport system	4.86414	0.583031	0.453818	0.999638	5	3	15	6	1	5
PPTDRAFT_00993	fructan beta-fructosidase	4.21064	1.15842	0.848655	0.999638	2	4	7	1	4	10
PPTDRAFT_00994	levanbiose-producing levanase	33.173	1.37422	0.27059	0.999638	17	18	78	38	21	61
PPTDRAFT_00995	ATP-binding cassette, subfamily B	18.2344	0.995505	0.990439	0.999638	14	10	46	24	7	28
PPTDRAFT_00996	ATP-binding cassette, subfamily B	48.5517	1.29456	0.264412	0.999638	37	25	94	57	25	96
PPTDRAFT_00997	MFS transporter, DHA1 family, multidrug	34.9045	1.14195	0.622013	0.999638	26	21	75	33	19	70
PPTDRAFT_00998	transcriptional regulator, TetR family	34.0445	0.890336	0.693392	0.999638	18	47	60	23	15	67
PPTDRAFT_00999	AraC-type DNA-binding protein	30.1494	0.780129	0.42455	0.999638	28	30	54	33	7	51
PPTDRAFT_01000	MFS transporter, SP family, arabinose:H+	38.2013	1.0396	0.882954	0.999638	30	27	76	27	27	67
PPTDRAFT_01001	two-component system, response regulator YesN	34.5424	1.01946	0.943739	0.999638	27	26	69	25	21	67
PPTDRAFT_01002	Putative regulator of cell autolysis	24.1601	1.13102	0.703451	0.999638	19	12	56	28	11	45
PPTDRAFT_01003	ribose transport system substrate-binding	37.3166	1.13565	0.623567	0.999638	25	31	66	37	23	62
PPTDRAFT_01004	alpha-galactosidase	8.63467	0.925264	0.892063	0.999638	11	2	22	4	5	18
PPTDRAFT_01005	Cellulase/cellobiase CelA1	3.7239	0.476298	0.408511	0.999638	5	1	14	0	2	7
PPTDRAFT_01006	PAS domain S-box-containing protein	468.897	1.04148	0.667561	0.999638	324	394	907	383	308	782
PPTDRAFT_01007	GntR family transcriptional regulator	15.4784	0.982915	0.965301	0.999638	10	14	33	13	8	29
PPTDRAFT_01008	ABC-2 type transport system ATP-binding protein	17.9796	1.56445	0.229814	0.999638	9	10	36	18	10	48
PPTDRAFT_01009	ABC-2 type transport system permease protein	66.3378	0.900734	0.61231	0.999638	47	44	187	64	28	116
PPTDRAFT_01010	Methylase involved in ubiquinone/menaquinone	80.6366	1.07866	0.683623	0.999638	62	62	139	76	58	110
PPTDRAFT_01011	phosphate transport system substrate-binding	42.7078	1.06825	0.786822	0.999638	27	35	90	38	24	80
PPTDRAFT_01012	hypothetical protein	46.6165	1.16643	0.512717	0.999638	37	26	96	51	23	90
PPTDRAFT_01013	Aldo/keto reductase	23.333	1.22353	0.551027	0.999638	10	13	71	22	11	55
PPTDRAFT_01014	G/U mismatch-specific uracil-DNA glycosylase	69.5426	0.904789	0.609522	0.999638	56	57	146	69	34	104
PPTDRAFT_01015	alanine dehydrogenase	4.79769	1.21744	0.804374	0.999638	5	0	13	6	4	3
PPTDRAFT_01016	purine catabolism regulatory protein	9.50684	0.83365	0.719312	0.999638	11	6	19	8	4	16
PPTDRAFT_01017	Copper amine oxidase N-terminal	7123.24	0.973733	0.687356	0.999638	5004	6842	12973	5505	4507	11611
PPTDRAFT_01018	galactokinase	83.9589	1.08179	0.68032	0.999638	42	66	215	80	40	171
PPTDRAFT_01019	PD-(D/E)XK nuclease superfamily protein	52.6321	1.02246	0.920293	0.999638	41	39	106	56	25	90
PPTDRAFT_01020	Lysophospholipase L1	4.13454	2.21865	0.322174	0.999638	3	1	5	5	1	17
PPTDRAFT_01021	Hemolysin, contains CBS domains	12.7089	1.00007	0.999866	0.999866	11	6	33	10	5	31
PPTDRAFT_01022	methyl-accepting chemotaxis protein	1412.51	0.947381	0.471845	0.999638	947	1339	2875	1053	832	2475
PPTDRAFT_01023	hypothetical protein	142.966	0.88443	0.39578	0.999638	127	122	268	147	65	207
PPTDRAFT_01024	conserved hypothetical integral membrane protein	23.7727	1.02319	0.944085	0.999638	13	21	56	19	11	53
PPTDRAFT_01025	NAD(P)-dependent dehydrogenase, short-chain	3.40188	0.609487	0.57176	0.999638	1	3	16	1	2	5
PPTDRAFT_01026	hypothetical protein	18.2336	1.04052	0.920384	0.999638	18	9	28	25	14	11
PPTDRAFT_01027	putative Mg2+ transporter-C (MgtC) family	5.32324	1.88067	0.384834	0.999638	0	6	11	5	3	14
PPTDRAFT_01028	peptidyl-prolyl cis-trans isomerase B	492.442	0.912545	0.328782	0.999638	437	332	1114	458	229	833
PPTDRAFT_01029	hypothetical protein	1.39904	1.28926	0.849263	0.999638	1	0	5	2	1	1
PPTDRAFT_01030	Protein of unknown function (DUF3886)	337.365	0.991752	0.936756	0.999638	256	317	554	330	208	450
PPTDRAFT_01031	MFS transporter, DHA1 family, multidrug	82.7902	0.890113	0.538234	0.999638	62	94	129	86	42	101
PPTDRAFT_01032	Spo0E like sporulation regulatory protein	450.27	1.07963	0.527	0.999638	447	351	587	413	262	744
PPTDRAFT_01033	Permease of the drug/metabolite transporter	322.839	1.0265	0.807333	0.999638	233	270	626	304	171	569
PPTDRAFT_01034	Sugar-specific transcriptional regulator TrmB	132.46	1.07304	0.638372	0.999638	80	112	280	120	73	249
PPTDRAFT_01035	Protein of unknown function (DUF1593)	8.23394	1.33707	0.593045	0.999638	7	5	12	7	5	19
PPTDRAFT_01036	3-deoxy-D-arabinoheptulosonate-7-phosphate	949.268	0.956597	0.579399	0.999638	694	589	2563	751	413	2085
PPTDRAFT_01037	hypothetical protein	7.69249	0.86036	0.788287	0.999638	9	5	14	6	4	12
PPTDRAFT_01038	hypothetical protein	5.45821	0.715587	0.629334	0.999638	2	7	15	1	3	13
PPTDRAFT_01039	hypothetical protein	27.943	1.04421	0.885323	0.999638	27	25	32	28	18	34
PPTDRAFT_01040	Signal transduction histidine kinase	307.577	1.82811	6.22471e-08	2.79334e-05	156	209	381	346	231	657
PPTDRAFT_01041	NHLP leader peptide domain-containing protein	5040.79	0.998892	0.988447	0.999638	3956	5392	6530	4983	3107	6296
PPTDRAFT_01042	hypothetical protein	329.72	1.14312	0.234822	0.999638	258	168	762	343	167	633
PPTDRAFT_01043	hypothetical protein	11.9717	0.8753	0.766477	0.999638	9	13	21	11	6	17
PPTDRAFT_01044	Putative intracellular protease/amidase	555.717	1.01632	0.859488	0.999638	359	635	787	452	406	720
PPTDRAFT_01045	transcriptional pleiotropic regulator of	138.383	0.983825	0.913194	0.999638	89	173	183	111	97	174
PPTDRAFT_01046	AloR3 receptor	179.165	0.877551	0.322458	0.999638	123	177	369	122	121	260
PPTDRAFT_01047	AloP3 peptide	541.173	0.994974	0.96088	0.999638	410	535	799	627	308	627
PPTDRAFT_01048	Spo0E like sporulation regulatory protein	24.0268	0.939384	0.846033	0.999638	18	26	38	22	13	35
PPTDRAFT_01049	Surface polysaccharide O-acyltransferase,	27.8177	1.0778	0.801127	0.999638	21	22	50	26	17	46
PPTDRAFT_01050	monosaccharide ABC transporter substrate-binding	7.60303	0.813493	0.718304	0.999638	3	11	16	3	5	13
PPTDRAFT_01051	two-component system, sensor histidine kinase	15.296	1.11409	0.793553	0.999638	9	13	30	20	5	30
PPTDRAFT_01052	two component transcriptional regulator, AraC	15.3841	1.39626	0.429963	0.999638	10	6	31	29	3	32
PPTDRAFT_01053	hydroxylamine reductase	42.4274	1.32933	0.247281	0.999638	25	33	69	48	28	71
PPTDRAFT_01054	Predicted transcription factor, homolog of	94.9747	1.2519	0.208263	0.999638	56	98	119	108	63	132
PPTDRAFT_01055	hypothetical protein	14.5847	1.46671	0.351992	0.999638	9	7	30	15	9	33
PPTDRAFT_01056	Predicted house-cleaning noncanonical NTP	9.10258	0.993787	0.990437	0.999638	8	5	21	6	6	17
PPTDRAFT_01057	Predicted acetyltransferase	319.046	0.994566	0.959582	0.999638	232	276	621	296	170	541
PPTDRAFT_01058	Serine/threonine protein kinase	575.477	1.05099	0.574716	0.999638	383	423	1313	497	302	1157
PPTDRAFT_01059	DNA-binding transcriptional regulator, XRE	329.529	1.08328	0.448134	0.999638	192	298	656	263	208	612
PPTDRAFT_01060	multiple monosaccharide-binding protein	0.252423	0.880188	0.96329	NA	0	0	2	0	0	1
PPTDRAFT_01061	putative multiple sugar transport system	0.267495	1.10314	0.972268	NA	0	0	1	1	0	0
PPTDRAFT_01062	multiple monosaccharide ABC transporter membrane	1.70412	0.488699	0.540607	0.999638	2	2	3	1	1	1
PPTDRAFT_01063	NAD(P)-dependent dehydrogenase, short-chain	5.25648	1.12326	0.863001	0.999638	3	4	12	5	2	13
PPTDRAFT_01064	L-ascorbate metabolism protein UlaG,	7.24937	1.05333	0.929793	0.999638	4	3	26	6	3	17
PPTDRAFT_01065	Lrp/AsnC family transcriptional regulator,	38.4096	1.08856	0.742386	0.999638	25	38	61	39	23	58
PPTDRAFT_01066	Acetyltransferases, including N-acetylases of	176.339	1.05293	0.707292	0.999638	132	178	246	182	103	248
PPTDRAFT_01067	EcsC protein family protein	37.3809	1.02569	0.923162	0.999638	29	25	81	44	15	66
PPTDRAFT_01068	MFS transporter, FSR family, fosmidomycin	213.141	0.969716	0.801242	0.999638	170	167	429	207	113	336
PPTDRAFT_01069	hypothetical protein	11.9024	1.46453	0.410267	0.999638	4	11	19	5	12	27
PPTDRAFT_01070	hypothetical protein	26.5773	1.27359	0.445624	0.999638	10	25	50	24	23	37
PPTDRAFT_01071	autotransporter-associated beta strand	10.6071	1.18289	0.728218	0.999638	10	4	23	11	5	22
PPTDRAFT_01072	PTS system, sucrose-specific IIC component	5.00115	2.32871	0.236917	0.999638	2	2	6	11	3	7
PPTDRAFT_01073	beta-glucosidase	16.7648	1.03902	0.92327	0.999638	8	16	38	20	7	28
PPTDRAFT_01074	beta-fructofuranosidase	16.7991	1.23344	0.604556	0.999638	5	17	36	19	11	24
PPTDRAFT_01075	AraC-type DNA-binding protein	190.66	1.12171	0.38195	0.999638	127	198	251	198	130	243
PPTDRAFT_01076	7-cyano-7-deazaguanine reductase	52.6171	1.00318	0.989482	0.999638	38	16	181	31	17	162
PPTDRAFT_01077	7-carboxy-7-deazaguanine synthase	64.4739	0.970947	0.890652	0.999638	37	33	211	45	16	202
PPTDRAFT_01078	6-pyruvoyltetrahydropterin/6-carboxytetrahydropterin synthase	30.4593	0.94446	0.850225	0.999638	20	12	106	17	9	96
PPTDRAFT_01079	preQ(0) biosynthesis protein QueC	84.2646	1.02081	0.911806	0.999638	38	44	299	45	32	259
PPTDRAFT_01081	Uncharacterized conserved protein	69.1847	0.793104	0.245402	0.999638	64	65	131	48	40	98
PPTDRAFT_01082	hypothetical protein	53.091	1.09924	0.666646	0.999638	38	46	87	53	34	79
PPTDRAFT_01083	hypothetical protein	49.6343	1.05431	0.830887	0.999638	25	61	75	56	29	60
PPTDRAFT_01084	hypothetical protein	129.291	1.16929	0.343289	0.999638	77	76	320	157	46	284
PPTDRAFT_01085	Predicted DNA-binding transcriptional regulator	188.707	0.928825	0.572703	0.999638	112	148	519	134	102	365
PPTDRAFT_01086	Inhibitor of the KinA pathway to sporulation,	182.852	1.07155	0.606787	0.999638	113	158	371	175	99	330
PPTDRAFT_01087	2',3'-cyclic-nucleotide 2'-phosphodiesterase/5'-	262.94	1.02963	0.798781	0.999638	199	173	603	230	123	557
PPTDRAFT_01088	Predicted Zn peptidase	5.05932	0.654812	0.541758	0.999638	5	4	13	2	3	8
PPTDRAFT_01089	Transcriptional regulator, contains XRE-family	32.6756	0.973253	0.921795	0.999638	25	28	63	27	19	55
PPTDRAFT_01090	phage transcriptional regulator, ArpU family	16.7939	1.34777	0.459662	0.999638	8	17	25	16	7	45
PPTDRAFT_01091	aminoglycoside 6-adenylyltransferase	133.243	0.889218	0.430332	0.999638	98	135	250	120	74	184
PPTDRAFT_01092	hypothetical protein	205.888	0.999179	0.994946	0.999638	181	181	315	203	108	321
PPTDRAFT_01093	hypothetical protein	30.931	0.895486	0.70228	0.999638	25	30	57	24	15	56
PPTDRAFT_01094	Phage tail sheath protein	141.668	1.05459	0.713784	0.999638	115	118	231	130	86	228
PPTDRAFT_01095	Phage tail tube protein	59.5602	0.95669	0.832103	0.999638	52	53	95	55	36	81
PPTDRAFT_01096	Phage XkdN-like tail assembly chaperone protein,	35.7524	1.05604	0.838656	0.999638	27	26	70	30	25	56
PPTDRAFT_01097	hypothetical protein	7.44944	0.748921	0.632377	0.999638	3	7	26	5	1	21
PPTDRAFT_01098	hypothetical protein	89.5812	0.907623	0.5887	0.999638	73	69	200	65	44	179
PPTDRAFT_01099	LysM domain-containing protein	60.3251	0.985966	0.949326	0.999638	38	58	123	56	24	125
PPTDRAFT_01100	hypothetical protein	49.9678	1.08113	0.734175	0.999638	35	35	108	37	31	102
PPTDRAFT_01101	hypothetical protein	11.0313	0.905715	0.835051	0.999638	8	8	26	10	8	12
PPTDRAFT_01102	Protein of unknown function (DUF2634)	20.4759	0.928053	0.830181	0.999638	13	22	39	19	11	30
PPTDRAFT_01103	Uncharacterized phage protein gp47/JayE	38.4297	1.11561	0.671605	0.999638	30	30	61	49	20	54
PPTDRAFT_01104	hypothetical protein (DUF2313)	77.0371	1.03122	0.869442	0.999638	54	65	150	76	42	127
PPTDRAFT_01105	Phage tail-collar fibre protein	22.181	0.805102	0.523354	0.999638	19	22	41	12	15	33
PPTDRAFT_01106	Phage tail fibre repeat-containing protein	84.5621	1.14158	0.463947	0.999638	52	63	178	62	57	172
PPTDRAFT_01107	toxin secretion/phage lysis holin	5.82814	1.0687	0.917218	0.999638	4	5	11	4	3	14
PPTDRAFT_01108	lysozyme	60.8462	1.0977	0.662624	0.999638	49	33	137	58	35	109
PPTDRAFT_01109	non-ribosomal peptide synthase domain	103.093	0.802499	0.192521	0.999638	84	92	237	70	48	190
PPTDRAFT_01110	cyclic peptide transporter	26.3149	0.706767	0.27404	0.999638	22	25	65	15	10	53
PPTDRAFT_01111	excinuclease ABC subunit A	7.99948	0.733973	0.589852	0.999638	14	3	14	6	3	11
PPTDRAFT_01112	Predicted O-methyltransferase YrrM	1.73897	1.34204	0.8216	0.999638	3	1	0	2	0	5
PPTDRAFT_01113	Non-ribosomal peptide synthetase modules and	4.14738	0.643679	0.576124	0.999638	8	2	6	3	1	6
PPTDRAFT_01114	hypothetical protein	4.99804	0.298004	0.137422	0.999638	13	3	6	2	0	6
PPTDRAFT_01115	amino acid adenylation domain-containing protein	20.9274	0.948222	0.894324	0.999638	39	7	24	15	10	30
PPTDRAFT_01116	Ketoacyl-synthetase C-terminal extension	15.4655	0.838964	0.66985	0.999638	19	6	36	17	7	18
PPTDRAFT_01117	aspartate aminotransferase	5.93505	0.430766	0.250493	0.999638	12	3	10	3	0	13
PPTDRAFT_01118	amino acid adenylation domain-containing protein	4.11546	0.725315	0.713984	0.999638	9	0	9	1	2	6
PPTDRAFT_01119	Phosphopantetheine attachment site	12.6468	0.646342	0.347112	0.999638	17	6	29	14	6	8
PPTDRAFT_01120	beta-1,4-N-acetylglucosamine oligosaccharide	4.17887	1.36968	0.675489	0.999638	2	4	6	6	2	7
PPTDRAFT_01121	amino acid adenylation domain-containing protein	28.2208	0.824471	0.515231	0.999638	28	25	49	25	15	36
PPTDRAFT_01122	[acyl-carrier-protein] S-malonyltransferase	6.37276	0.660742	0.518317	0.999638	5	7	15	4	1	16
PPTDRAFT_01123	amino acid adenylation domain-containing protein	48.8972	0.89077	0.638632	0.999638	56	22	113	42	24	78
PPTDRAFT_01124	amino acid adenylation domain-containing protein	37.0611	0.918597	0.746708	0.999638	29	24	96	35	16	67
PPTDRAFT_01125	peptide/nickel transport system	170.538	0.949004	0.709346	0.999638	120	162	336	150	82	308
PPTDRAFT_01126	peptide/nickel transport system permease protein	41.4885	0.927079	0.771588	0.999638	34	30	93	25	20	98
PPTDRAFT_01127	peptide/nickel transport system permease protein	123.558	0.759237	0.0721573	0.999638	115	101	289	100	51	199
PPTDRAFT_01128	dGTPase	70.701	1.20019	0.386074	0.999638	66	32	138	61	36	165
PPTDRAFT_01129	luciferase family oxidoreductase, group 1	32.3366	1.18783	0.5418	0.999638	23	19	69	27	21	65
PPTDRAFT_01130	Putative RNA methylase family UPF0020	33.3681	1.13817	0.646946	0.999638	32	21	53	35	14	70
PPTDRAFT_01131	Phosphoglycerate dehydrogenase	213.04	1.10515	0.427791	0.999638	181	114	459	220	105	403
PPTDRAFT_01132	2'-5' RNA ligase	44.5822	0.787985	0.327819	0.999638	41	31	115	33	17	87
PPTDRAFT_01133	N-acetylmuramoyl-L-alanine amidase	231.959	1.0414	0.737741	0.999638	174	197	410	245	123	366
PPTDRAFT_01134	L-ascorbate metabolism protein UlaG,	136.506	0.998878	0.993961	0.999638	98	90	339	131	64	256
PPTDRAFT_01135	glutamate synthase (ferredoxin)	993.69	0.843706	0.0316206	0.999638	874	708	2411	868	443	1651
PPTDRAFT_01136	Signal transduction histidine kinase	654.034	0.995342	0.956459	0.999638	480	528	1347	591	363	1106
PPTDRAFT_01137	two component transcriptional regulator, LuxR	169.715	1.08214	0.55641	0.999638	116	141	320	166	97	289
PPTDRAFT_01138	Capsular polysaccharide biosynthesis protein	66.947	0.977785	0.914156	0.999638	47	55	142	38	42	142
PPTDRAFT_01139	capsular exopolysaccharide family	14.073	0.744902	0.499994	0.999638	9	10	47	8	3	40
PPTDRAFT_01140	UTP--glucose-1-phosphate uridylyltransferase	40.5217	1.09821	0.718457	0.999638	29	16	119	45	14	89
PPTDRAFT_01141	Sugar transferase involved in LPS biosynthesis	19.4352	1.07742	0.838509	0.999638	16	7	54	23	7	38
PPTDRAFT_01142	Glycosyltransferases, probably involved in cell	21.7198	1.01675	0.962192	0.999638	14	9	74	17	10	48
PPTDRAFT_01143	O-antigen ligase	29.8988	0.794518	0.450607	0.999638	33	20	64	23	9	64
PPTDRAFT_01144	N-acetylglucosaminyldiphosphoundecaprenol	15.4465	1.10066	0.814863	0.999638	12	5	46	17	5	35
PPTDRAFT_01145	Lipid A core - O-antigen ligase and related	20.7791	1.51223	0.28066	0.999638	12	6	53	15	19	42
PPTDRAFT_01146	Membrane protein involved in the export of	18.083	0.78024	0.515273	0.999638	16	8	61	12	5	44
PPTDRAFT_01147	Glycosyltransferase involved in cell wall	16.7396	1.17048	0.686807	0.999638	14	10	31	12	10	39
PPTDRAFT_01148	Glycosyltransferase involved in cell wall	14.9793	0.799977	0.601042	0.999638	15	6	44	13	2	40
PPTDRAFT_01149	Glycosyltransferase involved in cell wall	17.0465	0.968286	0.936562	0.999638	17	4	54	13	7	37
PPTDRAFT_01150	Glycosyltransferase involved in cell wall	26.2227	1.39324	0.303343	0.999638	17	7	73	23	10	82
PPTDRAFT_01151	UDPglucose 6-dehydrogenase	35.1366	0.949675	0.85157	0.999638	24	15	120	28	11	89
PPTDRAFT_01152	mannose-1-phosphate guanylyltransferase	61.5665	1.32199	0.184236	0.999638	34	30	157	50	30	175
PPTDRAFT_01153	GEMM cis-regulatory element	15.87	0.9588	0.916226	0.999638	12	10	40	9	10	33
PPTDRAFT_01154	mannan endo-1,4-beta-mannosidase	85.908	0.931458	0.692628	0.999638	60	64	217	59	45	177
PPTDRAFT_01155	hypothetical protein	112.828	0.886323	0.451671	0.999638	85	96	256	82	56	216
PPTDRAFT_01156	hypothetical protein	59.8537	0.960267	0.848119	0.999638	52	49	105	48	39	89
PPTDRAFT_01157	Predicted transcription factor, homolog of	100.337	0.982673	0.917887	0.999638	58	113	180	76	63	163
PPTDRAFT_01158	Capsular polysaccharide biosynthesis protein	23.5449	0.719864	0.320169	0.999638	21	21	54	13	15	32
PPTDRAFT_01159	capsular exopolysaccharide family	7.3145	0.772224	0.667059	0.999638	3	7	24	3	2	22
PPTDRAFT_01160	Sugar transferase involved in LPS biosynthesis	6.93919	0.770528	0.671496	0.999638	8	5	13	6	1	17
PPTDRAFT_01161	GDP-L-fucose synthase	6.73432	1.11135	0.860379	0.999638	4	4	18	5	3	18
PPTDRAFT_01162	GDPmannose 4,6-dehydratase	20.0087	0.783411	0.522237	0.999638	14	17	52	24	3	39
PPTDRAFT_01163	Membrane protein involved in the export of	5.03899	1.06632	0.929981	0.999638	6	1	12	2	3	13
PPTDRAFT_01164	hypothetical protein	4.63976	1.47598	0.796522	0.999638	0	2	14	10	0	13
PPTDRAFT_01165	Glycosyltransferase involved in cell wall	3.89438	0.920936	0.915688	0.999638	4	2	8	5	2	4
PPTDRAFT_01166	Glycosyltransferase involved in cell wall	3.36356	1.20727	0.827947	0.999638	2	1	10	6	1	5
PPTDRAFT_01167	N-acetylglucosaminyldiphosphoundecaprenol	3.95807	0.980279	0.979339	0.999638	3	4	6	2	3	7
PPTDRAFT_01168	UDPglucose 6-dehydrogenase	7.0198	0.83832	0.762076	0.999638	4	7	18	5	4	11
PPTDRAFT_01169	transcriptional attenuator, LytR family	3.62942	1.44854	0.672574	0.999638	3	0	12	4	1	10
PPTDRAFT_01170	hypothetical protein	1.60186	2.07923	0.563223	0.999638	1	0	4	1	1	6
PPTDRAFT_01171	ABC-2 type transport system ATP-binding protein	267.718	1.04731	0.694185	0.999638	180	235	493	269	170	375
PPTDRAFT_01172	ABC-2 type transport system permease protein	81.8325	0.869012	0.449701	0.999638	72	58	188	88	28	140
PPTDRAFT_01173	Predicted PurR-regulated permease PerM	27.0313	0.942683	0.846345	0.999638	18	32	42	21	17	39
PPTDRAFT_01174	protein CcmA, bactofilin family	0.414778	1.11346	0.966963	NA	1	0	0	1	0	0
PPTDRAFT_01175	Membrane proteins related to	0.440737	1.5916	0.840941	NA	0	0	2	1	0	1
PPTDRAFT_01176	cardiolipin synthase	14.6347	0.75334	0.507566	0.999638	24	8	21	14	4	21
PPTDRAFT_01177	Uncharacterized membrane-anchored protein YitT,	325.958	0.998654	0.990133	0.999638	217	268	718	304	174	558
PPTDRAFT_01178	bifunctional non-homologous end joining protein	0.776678	7.73081	0.275825	0.999638	0	0	0	2	1	1
PPTDRAFT_01179	Sulfotransferase family protein	23.6758	0.640678	0.180567	0.999638	22	14	82	18	8	36
PPTDRAFT_01180	asparagine synthase (glutamine-hydrolysing)	11.9179	0.853342	0.753689	0.999638	11	4	37	3	8	28
PPTDRAFT_01181	hypothetical protein	41.8286	1.2386	0.408924	0.999638	20	31	96	46	18	95
PPTDRAFT_01182	Serine kinase of the HPr protein, regulates	10.5855	1.20475	0.707555	0.999638	7	3	34	8	5	28
PPTDRAFT_01183	Coenzyme PQQ synthesis protein D (PqqD)	4.1648	0.858808	0.858693	0.999638	7	0	10	3	0	13
PPTDRAFT_01184	Transglutaminase-like superfamily protein	1.00005	0.779698	0.87575	0.999638	0	1	4	2	0	1
PPTDRAFT_01185	Uncharacterised nucleotidyltransferase	12.221	0.915353	0.845051	0.999638	11	7	28	17	4	17
PPTDRAFT_01186	ABC transporter transmembrane region	10.3716	0.919124	0.863198	0.999638	8	6	29	7	4	26
PPTDRAFT_01187	erythromycin esterase	120.849	1.19587	0.264279	0.999638	80	123	154	117	80	190
PPTDRAFT_01188	DNA end-binding protein Ku	6.37718	0.857112	0.802711	0.999638	6	4	14	9	2	8
PPTDRAFT_01189	hypothetical protein	3.78845	2.24259	0.345544	0.999638	3	1	3	1	5	10
PPTDRAFT_01190	small acid-soluble spore protein H (minor)	8.60746	0.93398	0.897431	0.999638	4	10	19	6	5	15
PPTDRAFT_01191	acetate CoA/acetoacetate CoA-transferase beta	4.2116	1.40734	0.65261	0.999638	2	2	10	4	4	6
PPTDRAFT_01192	acetate CoA/acetoacetate CoA-transferase alpha	2.28338	3.3801	0.253016	0.999638	1	1	1	3	3	3
PPTDRAFT_01193	acetoacetate decarboxylase	1.89478	0.692668	0.748233	0.999638	1	2	5	3	0	3
PPTDRAFT_01194	acetyl-CoA C-acetyltransferase	1.25248	0.853534	0.913224	0.999638	0	1	6	2	0	2
PPTDRAFT_01195	Nicotinamidase-related amidase	104.894	1.43442	0.0299251	0.999638	75	60	172	109	63	231
PPTDRAFT_01196	tRNA threonylcarbamoyladenosine biosynthesis	235.627	1.1215	0.345905	0.999638	201	154	400	282	137	326
PPTDRAFT_01197	tRNA threonylcarbamoyladenosine biosynthesis	63.6269	1.01018	0.96132	0.999638	58	41	127	57	28	132
PPTDRAFT_01198	ribosomal-protein-alanine N-acetyltransferase	91.1159	1.06232	0.727433	0.999638	69	60	200	84	45	184
PPTDRAFT_01199	N6-L-threonylcarbamoyladenine synthase	213.801	0.919276	0.494335	0.999638	194	173	393	213	101	329
PPTDRAFT_01200	ATP-binding cassette, subfamily F, member 3	238.918	0.922577	0.496411	0.999638	189	197	502	221	113	407
PPTDRAFT_01201	5-formyltetrahydrofolate cyclo-ligase	215.032	1.01052	0.932696	0.999638	167	173	413	209	106	382
PPTDRAFT_01202	cyclic pyranopterin phosphate synthase	120.554	0.966538	0.838401	0.999638	92	73	302	143	34	244
PPTDRAFT_01203	molybdenum cofactor synthesis domain-containing	171.017	1.12299	0.400272	0.999638	145	93	359	163	84	357
PPTDRAFT_01204	sec-independent protein translocase protein TatA	320.482	0.980868	0.858017	0.999638	212	272	711	276	165	594
PPTDRAFT_01205	sec-independent protein translocase protein TatC	215.611	0.966634	0.781663	0.999638	161	174	455	172	126	374
PPTDRAFT_01206	chaperonin GroES	938.468	0.973177	0.733998	0.999638	826	579	2071	1014	368	1709
PPTDRAFT_01207	chaperonin GroEL	1722.43	1.015	0.841169	0.999638	1216	962	4791	1432	752	3863
PPTDRAFT_01208	Site-specific recombinase XerD	107.496	0.909411	0.59389	0.999638	81	74	272	57	61	239
PPTDRAFT_01209	Peptidase S24-like	189.46	1.04774	0.714881	0.999638	148	140	367	186	107	312
PPTDRAFT_01210	hypothetical protein	232.555	0.936431	0.584835	0.999638	160	193	543	198	112	433
PPTDRAFT_01211	Helix-turn-helix domain-containing protein	90.9574	0.774135	0.181226	0.999638	60	95	213	37	49	195
PPTDRAFT_01212	phage regulatory protein, rha family	296.078	0.928308	0.500332	0.999638	162	227	860	169	151	691
PPTDRAFT_01213	hypothetical protein	7.11238	0.925702	0.898904	0.999638	4	6	18	7	1	20
PPTDRAFT_01214	hypothetical protein	42.0769	1.09716	0.711874	0.999638	17	39	102	24	25	103
PPTDRAFT_01215	hypothetical protein	72.5588	1.05369	0.789568	0.999638	40	47	203	43	39	185
PPTDRAFT_01216	hypothetical protein	176.637	1.00137	0.992419	0.999638	119	104	480	105	79	485
PPTDRAFT_01217	PDDEXK-like protein of unknown function	93.7773	1.14953	0.436552	0.999638	27	62	314	43	49	282
PPTDRAFT_01218	single-strand binding protein	45.4253	1.07103	0.780573	0.999638	29	26	122	27	26	113
PPTDRAFT_01219	hypothetical protein	58.4863	1.06928	0.75754	0.999638	28	36	178	32	28	168
PPTDRAFT_01220	hypothetical protein	64.6551	1.1724	0.434163	0.999638	35	43	160	48	36	158
PPTDRAFT_01221	DNA replication protein DnaC	96.4084	0.89277	0.544739	0.999638	66	71	251	44	52	237
PPTDRAFT_01222	hypothetical protein	27.9603	1.05042	0.870554	0.999638	18	16	78	25	12	63
PPTDRAFT_01223	hypothetical protein	29.4623	0.884011	0.681536	0.999638	26	20	69	25	9	68
PPTDRAFT_01224	crossover junction endodeoxyribonuclease RusA	16.8631	0.745518	0.475936	0.999638	6	20	50	5	6	48
PPTDRAFT_01225	RNA polymerase sigma factor, sigma-70 family	33.0147	0.89015	0.687438	0.999638	25	23	84	16	20	71
PPTDRAFT_01226	hypothetical protein	10.3611	1.1683	0.773223	0.999638	3	8	28	10	1	38
PPTDRAFT_01227	hypothetical protein	21.5468	0.675581	0.253949	0.999638	23	15	57	16	7	37
PPTDRAFT_01228	hypothetical protein	0	#VALUE!	NA	NA	0	0	0	0	0	0
PPTDRAFT_01229	hypothetical protein	26.7048	0.998564	0.9963	0.999638	18	14	80	23	10	63
PPTDRAFT_01230	hypothetical protein	37.3892	0.810951	0.423967	0.999638	22	43	84	21	22	63
PPTDRAFT_01231	hypothetical protein	17.8546	0.945914	0.882313	0.999638	12	12	49	16	6	41
PPTDRAFT_01232	hypothetical protein	6.44918	0.975452	0.967679	0.999638	4	8	9	3	5	11
PPTDRAFT_01233	hypothetical protein	31.7913	0.779221	0.386321	0.999638	27	31	66	18	17	56
PPTDRAFT_01234	hypothetical protein	20.2705	1.11501	0.766211	0.999638	18	13	35	12	13	47
PPTDRAFT_01235	protein of unknown function (DUF3850)	12.9813	2.08961	0.096484	0.999638	8	6	15	13	10	34
PPTDRAFT_01236	hypothetical protein	31.4352	1.04852	0.867929	0.999638	27	20	64	27	16	64
PPTDRAFT_01237	hypothetical protein	6.40802	1.22342	0.74733	0.999638	8	4	6	6	3	13
PPTDRAFT_01238	hypothetical protein	19.5471	1.02483	0.946407	0.999638	17	10	46	17	6	52
PPTDRAFT_01239	RNA polymerase sigma-70 factor, ECF subfamily	24.5219	0.934478	0.837211	0.999638	19	23	45	27	8	45
PPTDRAFT_01240	hypothetical protein	79.8933	0.918868	0.66037	0.999638	81	68	121	65	46	119
PPTDRAFT_01241	hypothetical protein	87.8043	1.08572	0.65577	0.999638	90	70	103	98	46	126
PPTDRAFT_01242	hypothetical protein	108.805	0.892369	0.494902	0.999638	73	149	139	77	75	129
PPTDRAFT_01243	hypothetical protein	6.93483	0.727586	0.612355	0.999638	6	6	13	1	7	10
PPTDRAFT_01244	5-methylcytosine-specific restriction enzyme A	3.89146	1.3645	0.702769	0.999638	4	1	5	9	1	4
PPTDRAFT_01245	hypothetical protein	1.9324	0.511863	0.570443	0.999638	2	1	5	3	1	0
PPTDRAFT_01246	hypothetical protein	2.32866	0.231477	0.207923	0.999638	5	3	2	0	1	1
PPTDRAFT_01247	hypothetical protein	0.855515	1.10221	0.953118	0.999638	1	0	2	2	0	1
PPTDRAFT_01248	hypothetical protein	4.06893	1.28656	0.762846	0.999638	7	0	7	3	2	8
PPTDRAFT_01249	Phage terminase, small subunit	8.36393	0.812181	0.71329	0.999638	7	3	30	9	4	9
PPTDRAFT_01250	Phage terminase-like protein, large subunit,	32.0288	1.035	0.90899	0.999638	25	37	36	39	13	46
PPTDRAFT_01251	hypothetical protein	0.385884	0.628804	0.850168	NA	0	1	1	0	0	1
PPTDRAFT_01252	phage portal protein, HK97 family	15.9495	1.31068	0.500228	0.999638	14	7	24	29	7	19
PPTDRAFT_01253	ATP-dependent Clp protease, protease subunit	9.07439	0.530823	0.242141	0.999638	17	5	16	6	3	9
PPTDRAFT_01254	phage major capsid protein, HK97 family	17.6382	0.654542	0.295238	0.999638	22	15	31	19	2	30
PPTDRAFT_01255	hypothetical protein	4.43949	0.920919	0.909319	0.999638	3	4	10	4	2	8
PPTDRAFT_01256	hypothetical protein	5.79099	0.673578	0.548468	0.999638	8	5	8	7	1	7
PPTDRAFT_01257	hypothetical protein	6.66412	0.907152	0.873602	0.999638	8	3	14	4	4	12
PPTDRAFT_01258	phage head-tail adaptor, putative, SPP1 family	3.67626	0.959776	0.959197	0.999638	3	2	9	2	3	6
PPTDRAFT_01259	hypothetical protein	5.07168	0.783669	0.742308	0.999638	9	3	5	3	1	12
PPTDRAFT_01260	Protein of unknown function (DUF3383)	14.0514	0.920455	0.857997	0.999638	23	6	18	8	9	20
PPTDRAFT_01261	Protein of unknown function (DUF3277)	3.09577	0.62241	0.621925	0.999638	7	0	6	4	0	3
PPTDRAFT_01262	hypothetical protein	5.66879	0.594266	0.436817	0.999638	7	4	12	8	1	5
PPTDRAFT_01263	hypothetical protein	2.21459	1.03803	0.970702	0.999638	2	1	5	3	1	3
PPTDRAFT_01264	phage tail tape measure protein, TP901 family,	4.56353	1.97417	0.367724	0.999638	5	2	2	4	5	6
PPTDRAFT_01265	Phage-related protein	19.1708	1.05052	0.89644	0.999638	27	7	29	19	10	28
PPTDRAFT_01266	hypothetical protein	5.32012	0.723195	0.632417	0.999638	7	4	7	6	3	3
PPTDRAFT_01267	hypothetical protein	5.07512	0.775642	0.715107	0.999638	4	4	11	5	4	3
PPTDRAFT_01268	hypothetical protein	4.05328	0.733377	0.69662	0.999638	7	4	2	3	2	3
PPTDRAFT_01269	hypothetical protein	1.67941	0.751704	0.816713	0.999638	2	1	3	0	1	5
PPTDRAFT_01270	Protein of unknown function (DUF2634)	0.652472	2.02738	0.721914	NA	0	0	2	0	1	2
PPTDRAFT_01271	Uncharacterized phage protein gp47/JayE	3.04303	0.360688	0.292727	0.999638	2	4	8	0	3	2
PPTDRAFT_01272	hypothetical protein	1.83906	0.765946	0.825934	0.999638	2	0	8	1	0	6
PPTDRAFT_01273	hypothetical protein	16.4324	0.999465	0.998896	0.999638	16	10	30	19	9	21
PPTDRAFT_01274	hypothetical protein	2.1881	0.574934	0.607141	0.999638	4	1	4	2	0	4
PPTDRAFT_01275	hypothetical protein	0.919586	1.5463	0.805638	0.999638	0	2	0	1	1	0
PPTDRAFT_01276	hypothetical protein	1.54138	0.191103	0.237569	0.999638	1	4	2	0	1	0
PPTDRAFT_01277	N-acetylmuramoyl-L-alanine amidase	2.4519	1.08764	0.930646	0.999638	1	3	4	2	2	3
PPTDRAFT_01278	Bacteriophage holin of superfamily 6 (Holin_LLH)	3.18341	0.386594	0.343698	0.999638	6	5	1	0	1	4
PPTDRAFT_01279	Predicted amidophosphoribosyltransferases	1842.64	0.977263	0.751647	0.999638	1357	1755	3211	1499	1162	2871
PPTDRAFT_01280	DNA processing protein	965.813	0.972259	0.720418	0.999638	637	874	2025	758	566	1695
PPTDRAFT_01281	Glutamyl- and glutaminyl-tRNA synthetases	179.272	1.01985	0.891125	0.999638	136	189	251	175	97	274
PPTDRAFT_01282	hypothetical protein	36.9759	1.00513	0.984489	0.999638	26	42	48	38	24	41
PPTDRAFT_01283	hypothetical protein	163.83	1.20396	0.182539	0.999638	106	138	257	185	110	230
PPTDRAFT_01284	hypothetical protein	73.6191	0.958128	0.825695	0.999638	57	66	136	52	46	128
PPTDRAFT_01285	hypothetical protein	33.855	1.05588	0.846731	0.999638	26	27	59	21	26	60
PPTDRAFT_01286	hypothetical protein	39.8504	1.04008	0.877379	0.999638	27	36	75	38	20	73
PPTDRAFT_01287	hypothetical protein	30.7158	0.837141	0.57146	0.999638	23	31	57	43	8	41
PPTDRAFT_01288	protein of unknown function (DUF3862)	5254.57	0.947205	0.426728	0.999638	3819	5369	8948	4370	3211	7804
PPTDRAFT_01289	YolD-like protein	23.5124	0.745468	0.380254	0.999638	23	25	41	16	10	39
PPTDRAFT_01290	hypothetical protein	367.486	1.00479	0.963753	0.999638	242	375	636	325	223	565
PPTDRAFT_01291	accessory gene regulator B	481.572	0.980649	0.840513	0.999638	334	489	821	442	289	694
PPTDRAFT_01292	hypothetical protein	647.391	0.94662	0.527773	0.999638	434	586	1392	530	364	1096
PPTDRAFT_01293	Response regulator of the LytR/AlgR family	7638.2	0.985474	0.82212	0.999638	4993	7913	13309	6065	5017	11628
PPTDRAFT_01294	hypothetical protein	80.6441	1.03937	0.832833	0.999638	62	75	125	79	48	119
PPTDRAFT_01295	Threonine/homoserine/homoserine lactone efflux	35.8852	0.991596	0.974811	0.999638	26	28	76	39	18	55
PPTDRAFT_01296	Collagen triple helix repeat-containing protein	75.6411	1.16625	0.419906	0.999638	75	51	81	115	43	70
PPTDRAFT_01297	Phage terminase small subunit	65.6653	1.08872	0.684058	0.999638	64	54	67	102	29	67
PPTDRAFT_01298	Putative threonine efflux protein	164.789	0.877782	0.388206	0.999638	114	201	267	150	83	228
PPTDRAFT_01299	AraC-type DNA-binding protein	2.57826	2.05509	0.475465	0.999638	0	3	4	4	1	6
PPTDRAFT_01300	Predicted peptidase	2.07999	2.17616	0.473466	0.999638	1	1	2	1	3	4
PPTDRAFT_01301	polysaccharide deacetylase family sporulation	2.5703	2.52341	0.372328	0.999638	0	1	6	1	4	5
PPTDRAFT_01302	hypothetical protein	37.511	1.17806	0.54448	0.999638	18	34	70	37	30	48
PPTDRAFT_01303	hypothetical protein	4.91154	0.413798	0.220416	0.999638	6	4	16	3	1	6
PPTDRAFT_01304	sn-glycerol 3-phosphate transport system	1.59332	0.946387	0.969394	0.999638	1	2	0	5	0	0
PPTDRAFT_01305	sn-glycerol 3-phosphate transport system	0.667201	0.861374	0.93492	NA	1	0	2	1	0	1
PPTDRAFT_01306	sn-glycerol 3-phosphate transport system	21.1821	1.08824	0.812796	0.999638	21	14	26	18	20	20
PPTDRAFT_01307	transcriptional regulator, TetR family	565.15	1.09156	0.354208	0.999638	385	412	1194	592	299	987
PPTDRAFT_01308	HlyD family secretion protein	838.96	1.01229	0.88047	0.999638	645	550	1947	754	401	1670
PPTDRAFT_01309	ABC-2 type transport system permease protein	1757.93	0.98908	0.888028	0.999638	1249	1461	3654	1725	900	2922
PPTDRAFT_01310	glycine betaine/proline transport system	43.7249	1.55928	0.0683501	0.999638	22	28	78	47	27	101
PPTDRAFT_01311	glycine betaine/proline transport system	19.1614	1.28708	0.483442	0.999638	17	10	31	21	12	33
PPTDRAFT_01312	DNA-binding transcriptional regulator GbsR, MarR	261.699	0.854399	0.164659	0.999638	196	292	433	208	175	300
PPTDRAFT_01313	para-nitrobenzyl esterase	57.7709	1.10979	0.625671	0.999638	43	36	126	52	32	115
PPTDRAFT_01314	methyl-accepting chemotaxis sensory transducer	45.8057	1.25576	0.344016	0.999638	24	44	74	45	29	83
PPTDRAFT_01315	EamA domain-containing membrane protein RarD	108.906	0.951867	0.767881	0.999638	101	70	229	93	61	179
PPTDRAFT_01317	ABC-2 family transporter protein	23.7198	0.878409	0.687331	0.999638	16	26	44	19	15	31
PPTDRAFT_01318	ABC-2 type transport system ATP-binding protein	45.21	0.912593	0.708038	0.999638	34	40	92	51	19	67
PPTDRAFT_01319	Signal transduction histidine kinase	15.1902	1.48311	0.348467	0.999638	7	6	41	21	6	35
PPTDRAFT_01320	DNA-binding response regulator, OmpR family,	36.1097	1.36763	0.254092	0.999638	23	21	67	26	30	75
PPTDRAFT_01321	hypothetical protein	48.4709	1.20857	0.419852	0.999638	43	35	65	60	23	83
PPTDRAFT_01322	Formate-tetrahydrofolate ligase	59.3871	0.954136	0.824	0.999638	54	37	128	68	23	99
PPTDRAFT_01323	ABC-type Fe3+-hydroxamate transport system,	25.5454	0.784019	0.450015	0.999638	20	22	64	24	7	49
PPTDRAFT_01324	substrate-binding protein	48.294	0.815038	0.393733	0.999638	33	54	101	30	23	92
PPTDRAFT_01325	Threonine/homoserine/homoserine lactone efflux	59.6532	0.830808	0.383028	0.999638	43	81	80	42	40	66
PPTDRAFT_01326	Outer membrane lipoprotein-sorting protein	37.5844	0.954641	0.860526	0.999638	30	29	78	25	24	68
PPTDRAFT_01327	alanine racemase	402.111	1.00517	0.95898	0.999638	290	277	958	363	207	744
PPTDRAFT_01328	CopG family transcriptional regulator /	338.467	1.05684	0.62387	0.999638	184	225	936	199	207	787
PPTDRAFT_01329	mRNA interferase MazF	938.783	0.981273	0.838895	0.999638	684	737	2000	655	627	1633
PPTDRAFT_01330	uncharacterized protein	427.977	1.00104	0.991773	0.999638	347	278	962	397	227	743
PPTDRAFT_01331	SprT-like protein	32.5796	1.1725	0.572959	0.999638	22	23	60	36	23	44
PPTDRAFT_01332	tRNA_Asn_GTT	476.771	1.17762	0.0832893	0.999638	339	444	624	490	334	656
PPTDRAFT_01333	tRNA_Ser_GCT	4085.79	0.735593	0.150907	0.999638	3358	5499	4814	1916	3481	3709
PPTDRAFT_01334	hypothetical protein	28.9781	0.930231	0.827603	0.999638	28	19	56	13	14	79
PPTDRAFT_01335	transcriptional regulator, DeoR family	32.5127	0.781019	0.399893	0.999638	32	19	88	18	14	70
PPTDRAFT_01336	tRNA_Glu_TTC	406.661	0.960315	0.701756	0.999638	301	466	498	428	277	368
PPTDRAFT_01337	tRNA_Lys_TTT	651.392	1.07878	0.375728	0.999638	496	580	968	647	449	849
PPTDRAFT_01338	tRNA_Leu_GAG	274.762	1.1626	0.195687	0.999638	154	337	219	230	295	184
PPTDRAFT_01339	DNA-binding transcriptional regulator, MarR	569.403	0.939952	0.485504	0.999638	445	612	805	492	391	664
PPTDRAFT_01340	Transcriptional regulator, contains XRE-family	83.0934	1.05496	0.768512	0.999638	47	77	173	66	49	159
PPTDRAFT_01341	Predicted transcriptional regulators	229.837	1.08407	0.502798	0.999638	173	148	496	246	112	418
PPTDRAFT_01342	urease accessory protein	10.4366	1.24902	0.653688	0.999638	12	3	19	11	5	21
PPTDRAFT_01343	tRNA_Leu_GAG	355.824	1.04699	0.671935	0.999638	253	430	317	264	337	310
PPTDRAFT_01344	glutathione peroxidase	110.394	0.880717	0.490067	0.999638	75	72	326	70	74	175
PPTDRAFT_01346	hypothetical protein	33.8416	0.798659	0.420824	0.999638	24	39	65	33	16	41
PPTDRAFT_01347	hypothetical protein	14.1724	1.31843	0.509256	0.999638	10	9	21	20	10	16
PPTDRAFT_01348	K+-transporting ATPase ATPase A chain	14.033	1.04132	0.923383	0.999638	9	10	34	14	5	32
PPTDRAFT_01349	K+-transporting ATPase ATPase B chain	7.68635	1.05304	0.931004	0.999638	8	2	18	5	7	10
PPTDRAFT_01350	K+-transporting ATPase ATPase C chain	8.03032	0.441722	0.146334	0.999638	12	8	15	5	3	6
PPTDRAFT_01351	Multidrug resistance protein	101.123	0.944286	0.73838	0.999638	66	80	251	66	47	239
PPTDRAFT_01352	transcriptional regulator, PadR family	80.3388	0.946795	0.765719	0.999638	68	61	163	82	36	134
PPTDRAFT_01353	manganese transport protein	4388.39	0.994137	0.930175	0.999638	2876	3573	9956	3473	2639	7734
PPTDRAFT_01354	peroxiredoxin, Ohr subfamily	29.2955	0.958922	0.889399	0.999638	19	16	92	20	16	60
PPTDRAFT_01355	hypothetical protein	2768.35	0.989217	0.882326	0.999638	2482	2606	3329	3373	1656	2622
PPTDRAFT_01356	Predicted thiol-disulfide oxidoreductase YuxK,	94.9903	1.09091	0.60876	0.999638	61	88	160	86	68	136
PPTDRAFT_01357	Protein of unknown function (DUF3153)	94.3967	1.10029	0.575334	0.999638	60	77	190	86	55	174
PPTDRAFT_01358	manganese/zinc/iron transport system	5357.02	1.06016	0.386703	0.999638	3646	4395	10641	4913	2932	9907
PPTDRAFT_01359	manganese/zinc/iron transport system ATP-	1657.55	0.994918	0.947637	0.999638	1110	1260	3922	1474	757	3386
PPTDRAFT_01360	manganese/zinc/iron transport system permease	763.302	1.0724	0.430125	0.999638	544	403	2047	690	350	1651
PPTDRAFT_01361	manganese/zinc/iron transport system permease	1569.68	1.04902	0.518265	0.999638	1092	1248	3199	1498	855	2764
PPTDRAFT_01362	two-component system, OmpR family, sensor	31.4667	0.713189	0.236061	0.999638	23	27	93	18	15	55
PPTDRAFT_01363	hypothetical protein	4438.37	0.983321	0.813288	0.999638	3503	4634	5999	4491	2766	5237
PPTDRAFT_01364	Cellulose biosynthesis protein BcsQ	3.82096	0.927935	0.926757	0.999638	1	5	7	3	4	2
PPTDRAFT_01365	pilus assembly protein CpaF	0.98807	2.42682	0.564292	0.999638	1	0	1	1	1	2
PPTDRAFT_01366	tight adherence protein B	1.68066	1.19117	0.879775	0.999638	1	2	2	1	1	4
PPTDRAFT_01367	type II secretion system protein F (GspF)	1.50776	4.73704	0.262278	0.999638	0	2	0	1	2	3
PPTDRAFT_01368	Putative Flagellin, Flp1-like, domain	2.47009	0.642062	0.676621	0.999638	4	1	4	1	0	9
PPTDRAFT_01369	TadE-like protein	1.58807	0.717118	0.78825	0.999638	1	1	5	3	0	2
PPTDRAFT_01370	hypothetical protein	7.41877	1.34771	0.597879	0.999638	6	4	12	8	5	13
PPTDRAFT_01371	TadE-like protein	3.81591	1.02648	0.974406	0.999638	4	1	10	3	1	11
PPTDRAFT_01372	prepilin peptidase CpaA	2.18464	0.784231	0.813354	0.999638	2	1	7	2	1	3
PPTDRAFT_01373	FOG: FHA domain	31.1585	1.01293	0.966622	0.999638	13	38	62	32	15	49
PPTDRAFT_01374	hypothetical protein	19.9258	0.925286	0.825361	0.999638	13	20	41	14	11	37
PPTDRAFT_01375	Endonuclease IV	328.452	1.04787	0.657867	0.999638	235	207	796	309	144	701
PPTDRAFT_01376	formyltetrahydrofolate deformylase	390.71	1.04918	0.639769	0.999638	273	265	913	330	222	746
PPTDRAFT_01377	transketolase	1382.97	1.0154	0.843969	0.999638	963	786	3822	1071	620	3229
PPTDRAFT_01378	hypothetical protein	227.251	1.0647	0.609918	0.999638	178	178	408	238	111	404
PPTDRAFT_01379	3-hydroxyisobutyrate dehydrogenase	211.713	0.989596	0.932227	0.999638	159	136	524	190	95	430
PPTDRAFT_01380	glucose-6-phosphate isomerase	3114.11	1.01555	0.835409	0.999638	1891	2164	8241	2049	1762	6891
PPTDRAFT_01381	uncharacterized protein, YigZ family	105.272	1.14899	0.43809	0.999638	70	42	317	99	50	228
PPTDRAFT_01382	transcriptional regulator, TetR family	154.512	0.862162	0.296531	0.999638	125	136	330	123	72	276
PPTDRAFT_01383	secondary thiamine-phosphate synthase enzyme	35.1869	0.887144	0.658381	0.999638	28	21	99	31	15	65
PPTDRAFT_01384	sulfate transport system ATP-binding protein	871.506	0.789951	0.00376995	0.615187	742	778	1925	693	459	1219
PPTDRAFT_01385	phosphoribosyl 1,2-cyclic phosphate	170.811	1.129	0.371145	0.999638	111	122	365	171	96	311
PPTDRAFT_01386	DNA-binding transcriptional regulator, MocR	383.495	1.10414	0.330207	0.999638	293	263	753	372	227	660
PPTDRAFT_01387	Permease of the drug/metabolite transporter	364.762	1.02412	0.818068	0.999638	308	234	758	409	148	669
PPTDRAFT_01388	hypothetical protein	792.003	0.95749	0.603446	0.999638	475	697	1860	502	486	1549
PPTDRAFT_01389	lipoate-protein ligase A	501.801	1.09311	0.344535	0.999638	338	377	1040	408	318	942
PPTDRAFT_01390	L-threonine O-3-phosphate decarboxylase	49.2031	1.10278	0.671394	0.999638	36	31	108	55	21	97
PPTDRAFT_01391	adenosylcobinamide-phosphate synthase	17.7534	0.864769	0.704573	0.999638	17	8	51	12	7	40
PPTDRAFT_01392	alpha-ribazole phosphatase	42.0321	1.02123	0.93285	0.999638	41	28	73	46	17	76
PPTDRAFT_01394	iron complex transport system substrate-binding	145.764	1.1181	0.44031	0.999638	114	83	316	168	68	264
PPTDRAFT_01395	iron complex transport system permease protein	42.4238	1.08903	0.734827	0.999638	28	23	114	46	18	85
PPTDRAFT_01396	iron complex transport system ATP-binding	65.4385	1.18723	0.39591	0.999638	51	38	131	68	30	143
PPTDRAFT_01397	nicotinate-nucleotide-dimethylbenzimidazole	35.6458	0.88019	0.659426	0.999638	35	27	66	37	8	78
PPTDRAFT_01398	adenosylcobinamide kinase	27.5238	1.01182	0.968805	0.999638	24	19	52	28	16	40
PPTDRAFT_01399	cobalamin-5'-phosphate synthase	34.8732	1.1341	0.65351	0.999638	27	15	84	48	8	79
PPTDRAFT_01400	adenosylcobyric acid synthase	144.565	1.04355	0.766881	0.999638	111	91	329	153	62	279
PPTDRAFT_01401	methyl-accepting chemotaxis protein	1818.23	0.982234	0.799657	0.999638	1082	1739	3812	1241	1187	3239
PPTDRAFT_01402	PTS system, beta-glucosides-specific IIC	139.157	0.906675	0.522774	0.999638	90	135	306	128	66	229
PPTDRAFT_01403	transcriptional antiterminator, BglG family	338.042	0.967957	0.766017	0.999638	260	345	528	300	197	502
PPTDRAFT_01404	PTS system, beta-glucosides-specific IIC	30.5784	0.874455	0.639223	0.999638	28	27	52	34	15	36
PPTDRAFT_01405	hypothetical protein	2538.4	0.942764	0.406365	0.999638	1899	1731	6442	2316	1157	4678
PPTDRAFT_01406	hypothetical protein	255.922	0.897331	0.347803	0.999638	161	245	591	182	140	462
PPTDRAFT_01407	Creatinase/Prolidase N-terminal	169.098	1.07669	0.585846	0.999638	148	89	366	192	74	307
PPTDRAFT_01408	Glyoxylase, beta-lactamase superfamily II	93.6279	1.00804	0.965151	0.999638	74	56	218	110	47	134
PPTDRAFT_01409	phosphinothricin acetyltransferase	412.6	0.990214	0.921278	0.999638	363	347	665	422	219	611
PPTDRAFT_01410	Uncharacterized membrane protein YjjB, DUF3815	19.068	0.861848	0.68359	0.999638	22	10	39	24	5	30
PPTDRAFT_01411	Uncharacterized membrane protein YjjP, DUF1212	21.1718	0.896761	0.755049	0.999638	18	22	32	25	8	29
PPTDRAFT_01412	hypothetical protein	0.173242	1.12617	0.965985	NA	0	0	1	0	0	1
PPTDRAFT_01413	hypothetical protein	127.362	0.887486	0.447482	0.999638	113	77	324	102	63	226
PPTDRAFT_01414	putative hydrolase of the HAD superfamily	53.5806	1.10561	0.652934	0.999638	40	30	126	51	29	103
PPTDRAFT_01415	hypothetical protein	157.541	1.01245	0.932339	0.999638	120	130	300	160	68	298
PPTDRAFT_01416	malate dehydrogenase	21.129	1.30256	0.456055	0.999638	13	12	42	19	19	31
PPTDRAFT_01417	S-adenosylmethionine decarboxylase	7.19202	0.41231	0.145597	0.999638	7	9	19	7	1	6
PPTDRAFT_01418	hypothetical protein	349.065	1.52623	5.15172e-05	0.0146011	204	263	466	350	270	654
PPTDRAFT_01419	23S rRNA pseudouridine1911/1915/1917 synthase	168.039	0.992989	0.961642	0.999638	119	119	393	144	110	254
PPTDRAFT_01420	ATP-dependent DNA helicase, RecQ-like (EC	168.557	0.831774	0.198273	0.999638	135	147	383	144	63	319
PPTDRAFT_01421	Radical SAM superfamily enzyme YgiQ, UPF0313	400.541	0.978149	0.822995	0.999638	307	296	884	373	190	741
PPTDRAFT_01422	alkaline phosphatase	6.43939	1.39381	0.590465	0.999638	4	4	11	10	2	14
PPTDRAFT_01423	BsrG	390.863	0.987298	0.897255	0.999638	333	326	650	414	220	525
PPTDRAFT_01424	membrane protein DedA, SNARE-associated domain	48.4271	0.81575	0.434098	0.999638	30	57	102	49	15	81
PPTDRAFT_01425	Phospholipid N-methyltransferase	58.5746	1.03735	0.863048	0.999638	36	48	129	39	39	114
PPTDRAFT_01426	hypothetical protein	7.36994	0.766611	0.640052	0.999638	6	7	17	6	3	12
PPTDRAFT_01427	FlxA-like protein	9.79012	0.801412	0.657774	0.999638	11	7	19	10	3	16
PPTDRAFT_01428	Acetyltransferases	31.7399	1.18786	0.54475	0.999638	22	20	64	33	21	51
PPTDRAFT_01429	hypothetical protein	23.4832	1.19	0.593997	0.999638	13	18	50	17	14	56
PPTDRAFT_01430	8-oxo-dGTP diphosphatase	19.0942	0.75225	0.451453	0.999638	15	17	48	16	4	43
PPTDRAFT_01431	Predicted acetyltransferase	8.88656	1.29571	0.632916	0.999638	2	6	28	4	6	25
PPTDRAFT_01432	hypothetical protein	13.1653	1.12906	0.793834	0.999638	11	8	23	5	8	40
PPTDRAFT_01433	hypothetical protein	21.0394	1.04159	0.907274	0.999638	19	10	49	20	12	35
PPTDRAFT_01434	thioredoxin reductase (NADPH)	280.418	1.04377	0.697885	0.999638	200	217	579	250	155	517
PPTDRAFT_01435	hypothetical protein	18.3008	0.822033	0.614233	0.999638	23	10	30	18	13	13
PPTDRAFT_01436	hypothetical protein	63.0577	0.914599	0.662432	0.999638	44	70	106	52	39	86
PPTDRAFT_01437	uncharacterized protein	47.3712	0.828412	0.419992	0.999638	42	51	74	39	27	59
PPTDRAFT_01438	iron complex transport system substrate-binding	108.862	1.08172	0.629342	0.999638	67	92	214	81	82	179
PPTDRAFT_01439	bacillibactin ABC transporter integral membrane	84.1304	0.973895	0.892739	0.999638	70	46	214	54	46	184
PPTDRAFT_01440	bacillibactin ABC transporter integral membrane	65.9819	1.04128	0.853528	0.999638	47	42	151	49	52	99
PPTDRAFT_01441	hypothetical protein	194.092	0.943061	0.659575	0.999638	148	186	343	135	125	321
PPTDRAFT_01442	Regulator of protease activity HflC,	9.70102	1.18741	0.733533	0.999638	6	7	20	8	4	27
PPTDRAFT_01443	hypothetical protein	7.04869	2.10284	0.227094	0.999638	5	1	12	9	6	13
PPTDRAFT_01444	hypothetical protein	34.5007	1.11475	0.690593	0.999638	24	32	52	41	19	49
PPTDRAFT_01445	Response regulator containing a CheY-like	74.2295	1.02204	0.909594	0.999638	49	69	138	74	43	111
PPTDRAFT_01446	tRNA (cmo5U34)-methyltransferase	8.87871	1.11683	0.838406	0.999638	9	3	18	9	7	10
PPTDRAFT_01447	Saccharopine dehydrogenase, NADP-dependent	7.72294	0.968347	0.954812	0.999638	3	6	25	4	5	16
PPTDRAFT_01448	hypothetical protein	82.4162	1.06316	0.736968	0.999638	64	54	174	84	45	139
PPTDRAFT_01449	hypothetical protein	60.5529	1.14305	0.525656	0.999638	43	38	129	70	30	108
PPTDRAFT_01450	hypothetical protein	30.1717	0.801134	0.464192	0.999638	23	26	74	15	13	72
PPTDRAFT_01451	putative hydrolase of the HAD superfamily	104.886	1.0041	0.980417	0.999638	56	84	278	81	56	212
PPTDRAFT_01452	Protein N-acetyltransferase, RimJ/RimL family	48.9205	0.786072	0.308673	0.999638	45	25	151	35	16	106
PPTDRAFT_01453	Protein of unknown function (DUF2809)	35.3776	1.01368	0.961849	0.999638	24	25	81	47	10	67
PPTDRAFT_01454	Lysophospholipase L1	174.239	1.02048	0.882186	0.999638	133	113	405	135	89	376
PPTDRAFT_01455	hypothetical protein	36.1915	0.933114	0.798561	0.999638	30	30	72	28	16	76
PPTDRAFT_01456	hypothetical protein	65.6941	0.854415	0.457201	0.999638	52	65	129	46	30	128
PPTDRAFT_01457	ribosomal-protein-alanine N-acetyltransferase	47.6317	0.888707	0.61126	0.999638	41	36	105	41	23	81
PPTDRAFT_01458	GIY-YIG catalytic domain-containing protein	44.6739	0.67814	0.119336	0.999638	49	43	86	32	17	68
PPTDRAFT_01459	hypothetical protein	37.0003	1.16721	0.553908	0.999638	29	26	64	40	19	69
PPTDRAFT_01460	hypothetical protein	12.5129	0.964853	0.935734	0.999638	6	14	26	11	8	17
PPTDRAFT_01461	Barstar (barnase inhibitor)	28.1918	1.01904	0.950495	0.999638	16	26	55	22	24	34
PPTDRAFT_01462	putative transcriptional regulator	94.6348	0.807546	0.236832	0.999638	75	120	138	89	47	107
PPTDRAFT_01463	hypothetical protein	6.99129	1.29271	0.663117	0.999638	7	5	7	6	5	12
PPTDRAFT_01464	hypothetical protein	40.4284	0.874713	0.603449	0.999638	29	43	78	28	20	76
PPTDRAFT_01465	tRNA_Pro_GGG	1676.88	1.01883	0.943601	0.999638	1804	1359	1525	1417	1542	1275
PPTDRAFT_01466	Arabinose efflux permease	382.703	1.05099	0.654539	0.999638	254	366	662	394	208	607
PPTDRAFT_01467	2-oxoglutarate dehydrogenase E1 component	508.371	0.998319	0.986125	0.999638	342	379	1215	477	232	992
PPTDRAFT_01468	2-oxoglutarate dehydrogenase E2 component	279.262	1.04441	0.707387	0.999638	206	225	532	215	174	520
PPTDRAFT_01469	DinB superfamily protein	178.178	1.0251	0.865546	0.999638	136	118	394	136	123	296
PPTDRAFT_01470	Lysophospholipase, alpha-beta hydrolase	346.559	1.00485	0.963927	0.999638	257	214	872	269	163	779
PPTDRAFT_01471	mannose-6-phosphate isomerase, type 1 (EC	370.668	1.06477	0.537073	0.999638	279	214	896	340	163	820
PPTDRAFT_01472	Predicted S-adenosylmethionine-dependent	84.1434	0.99076	0.95891	0.999638	68	53	196	86	35	160
PPTDRAFT_01473	hypothetical protein	155.02	1.0372	0.796169	0.999638	116	109	333	131	94	274
PPTDRAFT_01474	hypothetical protein	91.3063	1.0721	0.687924	0.999638	59	96	128	84	70	108
PPTDRAFT_01475	tRNA (guanine-N7-)-methyltransferase	486.908	1.04249	0.669915	0.999638	325	370	1076	427	300	821
PPTDRAFT_01476	processive 1,2-diacylglycerol	331.268	1.06119	0.577811	0.999638	291	201	660	352	168	560
PPTDRAFT_01477	undecaprenyl-diphosphatase	92.7936	1.16293	0.387945	0.999638	58	67	194	98	51	170
PPTDRAFT_01478	Glycosyltransferase, catalytic subunit of	738.289	1.03824	0.681717	0.999638	472	553	1722	577	477	1306
PPTDRAFT_01479	bacterial translation initiation factor 3	3839.23	0.973127	0.692842	0.999638	2551	3268	8409	2703	2372	7080
PPTDRAFT_01480	Long range pseudoknot	0	#VALUE!	NA	NA	0	0	0	0	0	0
PPTDRAFT_01481	large subunit ribosomal protein L35	3527.86	0.874088	0.118884	0.999638	2304	3266	8049	1851	2189	6973
PPTDRAFT_01482	LSU ribosomal protein L20P	7480.37	0.941813	0.338678	0.999638	5341	7572	13064	5932	4952	10567
PPTDRAFT_01483	nucleoside-binding protein	6192.64	1.01351	0.838058	0.999638	4264	5493	11972	5230	3602	10886
PPTDRAFT_01484	nucleoside ABC transporter ATP-binding protein	491.15	1.00843	0.929796	0.999638	299	344	1318	398	240	1037
PPTDRAFT_01485	nucleoside ABC transporter membrane protein	220.126	1.04294	0.733758	0.999638	135	177	496	186	135	386
PPTDRAFT_01486	nucleoside ABC transporter membrane protein	384.709	1.07809	0.470238	0.999638	241	307	823	367	218	679
PPTDRAFT_01487	hypothetical protein	259.717	1.03863	0.749261	0.999638	240	164	477	285	144	372
PPTDRAFT_01488	Ribosomal protein S18 acetylase RimI	2.33895	2.80485	0.311931	0.999638	1	1	2	4	2	4
PPTDRAFT_01489	acetolactate synthase, large subunit	912.484	0.957377	0.605532	0.999638	685	606	2283	696	409	2036
PPTDRAFT_01490	acetolactate synthase, small subunit	477.111	0.906502	0.295115	0.999638	385	399	992	399	251	793
PPTDRAFT_01491	ketol-acid reductoisomerase	1610.92	0.990216	0.895143	0.999638	944	1088	4625	1089	823	3643
PPTDRAFT_01492	2-isopropylmalate synthase	427.474	0.977338	0.813987	0.999638	323	257	1118	392	178	881
PPTDRAFT_01493	3-isopropylmalate dehydrogenase	27.0672	1.34891	0.328434	0.999638	13	18	59	21	20	59
PPTDRAFT_01494	Alkyl hydroperoxide reductase subunit AhpC	18161.8	0.9201	0.238137	0.999638	10749	21132	31537	10339	13648	27788
PPTDRAFT_01495	hypothetical protein	677.132	0.995012	0.957106	0.999638	491	707	1037	543	436	1040
PPTDRAFT_01496	PAS domain S-box-containing protein	168.522	1.06431	0.641732	0.999638	112	152	299	134	120	268
PPTDRAFT_01497	diguanylate cyclase (GGDEF) domain-containing	182.512	0.882881	0.33649	0.999638	153	171	324	156	112	236
PPTDRAFT_01498	tRNA_Gly_TCC	196.186	1.10109	0.468457	0.999638	96	220	335	157	138	312
PPTDRAFT_01499	Site-specific recombinase XerD	33.83	0.939641	0.823785	0.999638	32	21	71	29	21	49
PPTDRAFT_01500	protein of unknown function (DUF955)	130.292	1.10397	0.517951	0.999638	88	113	216	98	106	195
PPTDRAFT_01501	Predicted transcription factor, homolog of	142.116	0.977515	0.875154	0.999638	86	152	258	115	94	207
PPTDRAFT_01502	putative transcriptional regulator	42.2812	0.866052	0.581418	0.999638	41	40	68	37	16	77
PPTDRAFT_01503	DNA binding domain-containing protein,	9.85141	0.94118	0.904238	0.999638	7	8	22	5	5	25
PPTDRAFT_01504	phage regulatory protein, rha family	26.5304	0.924961	0.797891	0.999638	21	27	42	25	16	33
PPTDRAFT_01505	hypothetical protein	10.3195	1.42962	0.462246	0.999638	6	7	18	11	5	26
PPTDRAFT_01506	hypothetical protein	8.0444	0.840179	0.752632	0.999638	6	7	16	6	7	7
PPTDRAFT_01507	hypothetical protein	5.78183	1.17445	0.8033	0.999638	3	5	10	3	6	9
PPTDRAFT_01508	Phage replication protein, DnaD domain	11.5117	1.60008	0.329507	0.999638	3	10	19	15	10	14
PPTDRAFT_01509	hypothetical protein	4.7562	2.13118	0.326408	0.999638	4	0	10	5	2	16
PPTDRAFT_01510	hypothetical protein	8.94924	1.20413	0.73989	0.999638	2	8	24	13	4	13
PPTDRAFT_01511	hypothetical protein	14.9097	1.08642	0.838666	0.999638	14	8	29	14	9	25
PPTDRAFT_01512	hypothetical protein	7.07463	1.11324	0.862706	0.999638	2	7	14	8	7	4
PPTDRAFT_01513	hypothetical protein	1.46292	0.202127	0.2744	0.999638	1	5	1	0	0	1
PPTDRAFT_01514	hypothetical protein	14.4819	1.31292	0.517021	0.999638	12	11	18	13	8	33
PPTDRAFT_01515	hypothetical protein	757.631	1.1215	0.274857	0.999638	537	782	849	991	475	750
PPTDRAFT_01516	hypothetical protein	5.18931	1.71063	0.444721	0.999638	3	2	7	7	6	4
PPTDRAFT_01517	RNA polymerase sigma-70 factor, ECF subfamily	6.15566	0.806028	0.749658	0.999638	2	10	11	1	3	17
PPTDRAFT_01518	hypothetical protein	0.692779	0.443199	0.68198	0.999638	0	2	1	1	0	0
PPTDRAFT_01519	HicB_like antitoxin of toxin-antitoxin system	77.4383	1.00922	0.961239	0.999638	57	44	205	77	31	159
PPTDRAFT_01520	Predicted RNA binding protein YcfA, dsRBD-like	465.639	1.10317	0.333486	0.999638	348	401	720	548	256	670
PPTDRAFT_01521	hypothetical protein	1.15622	0.985351	0.992093	0.999638	0	1	3	0	2	1
PPTDRAFT_01522	Phage terminase, small subunit	4.59686	1.02676	0.972266	0.999638	2	10	2	3	3	4
PPTDRAFT_01523	Phage terminase-like protein, large subunit,	6.7579	0.860067	0.811651	0.999638	7	10	4	3	4	10
PPTDRAFT_01524	phage portal protein, HK97 family	3.00249	1.13137	0.889933	0.999638	1	4	5	4	1	5
PPTDRAFT_01525	hypothetical protein	0.598526	0.479363	0.722515	NA	0	2	1	0	0	1
PPTDRAFT_01526	phage major capsid protein, HK97 family	0.917993	0.230184	0.374367	0.999638	2	1	2	0	0	1
PPTDRAFT_01527	Collagen triple helix repeat-containing protein	0.990798	1.3174	0.880666	0.999638	0	0	3	4	0	0
PPTDRAFT_01528	hypothetical protein	0.173242	1.12617	0.965985	NA	0	0	1	0	0	1
PPTDRAFT_01529	phage head-tail adaptor, putative, SPP1 family	0.305988	2.11469	0.790801	NA	0	0	0	0	1	0
PPTDRAFT_01530	Bacteriophage HK97-gp10, putative tail-component	0.629051	2.09639	0.713981	NA	0	0	2	2	0	1
PPTDRAFT_01531	hypothetical protein	0.188314	2.03825	0.800423	NA	0	0	0	1	0	0
PPTDRAFT_01532	phage major tail protein, phi13 family	1.85269	0.439259	0.475382	0.999638	3	1	5	2	0	2
PPTDRAFT_01533	hypothetical protein	0.0791806	0.610884	0.861243	NA	0	0	1	0	0	0
PPTDRAFT_01534	Phage-related minor tail protein	6.42122	1.69089	0.388367	0.999638	4	5	6	8	5	10
PPTDRAFT_01535	Phage-related protein	1.21438	0.413909	0.571918	0.999638	3	0	2	2	0	0
PPTDRAFT_01536	hypothetical protein	0.385884	0.628804	0.850168	NA	0	1	1	0	0	1
PPTDRAFT_01537	Phage tail fibre repeat-containing protein	0.74725	0.837229	0.924401	0.999638	0	1	2	0	0	4
PPTDRAFT_01538	hypothetical protein	0.0940617	2.08505	0.794493	NA	0	0	0	0	0	1
PPTDRAFT_01539	Phage uncharacterised protein (Phage_XkdX)	0.465065	0.500373	0.759965	NA	0	1	2	0	0	1
PPTDRAFT_01540	Phage-related protein	2.65783	1.31214	0.788893	0.999638	0	3	5	6	1	2
PPTDRAFT_01541	phage minor structural protein, N-terminal	1.62657	1.07066	0.953332	0.999638	1	1	4	2	1	2
PPTDRAFT_01542	Copper amine oxidase N-terminal	723.444	0.959327	0.629805	0.999638	482	740	1302	507	493	1143
PPTDRAFT_01543	toxin secretion/phage lysis holin	0.637926	0.394467	0.69514	NA	0	3	0	0	0	0
PPTDRAFT_01544	Phage-related lysozyme (muramidase), GH24 family	1.65142	0.318333	0.386501	0.999638	1	3	4	0	0	5
PPTDRAFT_01545	hypothetical protein	608.516	0.972651	0.768252	0.999638	375	698	1006	484	394	891
PPTDRAFT_01546	hypothetical protein	869.452	1.00768	0.926714	0.999638	528	973	1396	629	625	1305
PPTDRAFT_01547	hypothetical protein	1751.27	0.977168	0.762977	0.999638	1105	1944	2927	1345	1156	2646
PPTDRAFT_01548	pectin lyase	153.172	0.936767	0.642946	0.999638	91	181	260	96	111	228
PPTDRAFT_01549	ATP-binding cassette, subfamily F, member 3	40.1531	0.891584	0.654464	0.999638	31	33	90	42	15	69
PPTDRAFT_01550	phenylalanyl-tRNA synthetase, alpha subunit	261.444	0.904793	0.390806	0.999638	214	152	709	260	92	504
PPTDRAFT_01551	phenylalanyl-tRNA synthetase beta subunit	833.345	0.969319	0.710119	0.999638	613	499	2267	676	375	1774
PPTDRAFT_01552	hypothetical protein	1569.53	0.939932	0.42376	0.999638	1250	1440	2826	1394	840	2519
PPTDRAFT_01553	4 TMS phage holin, superfamily IV	19.5107	0.804374	0.570118	0.999638	19	25	23	15	7	33
PPTDRAFT_01554	DNA mismatch repair protein MutS2	570.59	0.965566	0.694034	0.999638	420	398	1396	471	273	1149
PPTDRAFT_01555	putative membrane protein	49.5267	1.05661	0.810801	0.999638	41	28	110	58	19	94
PPTDRAFT_01556	hypothetical protein	311.782	0.897905	0.320865	0.999638	208	238	843	243	149	595
PPTDRAFT_01557	MFS transporter, YQGE family, putative	229.799	0.989873	0.933376	0.999638	158	229	396	218	139	323
PPTDRAFT_01558	Glycine/D-amino acid oxidase (deaminating)	4.83943	0.755293	0.695855	0.999638	5	2	15	5	1	9
PPTDRAFT_01559	hypothetical protein	7.08095	0.860121	0.800634	0.999638	4	9	14	6	2	15
PPTDRAFT_01560	Coat F domain-containing protein	19.0202	1.25407	0.532218	0.999638	13	13	32	27	10	28
PPTDRAFT_01561	DNA-binding transcriptional regulator, Lrp	567.529	1.1014	0.280663	0.999638	438	406	1066	606	291	1004
PPTDRAFT_01562	aminotransferase	360.406	0.977362	0.828715	0.999638	267	222	943	275	172	783
PPTDRAFT_01563	Spo0E like sporulation regulatory protein	1234.22	0.948916	0.491118	0.999638	1002	1298	1664	1217	800	1335
PPTDRAFT_01564	hypothetical protein	40.3236	0.8771	0.613691	0.999638	34	26	103	31	13	97
PPTDRAFT_01565	cob(I)alamin adenosyltransferase	46.9342	1.12019	0.632661	0.999638	32	25	120	47	17	115
PPTDRAFT_01566	23S rRNA pseudouridine1911/1915/1917 synthase	70.1482	0.956937	0.825281	0.999638	53	39	194	61	22	173
PPTDRAFT_01567	arsenate reductase	71.7345	1.03258	0.869994	0.999638	51	48	170	70	28	157
PPTDRAFT_01568	5'-3' exonuclease	213.886	0.945369	0.655809	0.999638	177	180	407	197	102	372
PPTDRAFT_01569	fructokinase	334.835	1.09578	0.402723	0.999638	242	185	833	335	158	673
PPTDRAFT_01570	Superfamily II DNA helicase	12.9867	1.1489	0.747617	0.999638	8	9	29	11	8	26
PPTDRAFT_01571	magnesium transporter	357.677	1.03133	0.763358	0.999638	265	304	654	308	218	601
PPTDRAFT_01572	Site-specific recombinase XerD	32.1986	0.907536	0.731162	0.999638	20	39	56	23	19	51
PPTDRAFT_01573	hypothetical protein	114.332	1.10216	0.541414	0.999638	78	112	161	123	78	139
PPTDRAFT_01574	Helix-turn-helix domain-containing protein	265.25	0.985056	0.894146	0.999638	191	279	393	244	182	318
PPTDRAFT_01575	Transcriptional regulator, contains XRE-family	293.235	0.958486	0.713996	0.999638	206	322	466	256	173	426
PPTDRAFT_01576	hypothetical protein	50.5087	0.96923	0.891003	0.999638	39	50	83	44	28	81
PPTDRAFT_01577	hypothetical protein	11.3269	0.845709	0.715518	0.999638	9	12	20	8	7	16
PPTDRAFT_01578	hypothetical protein	3.77425	4.35039	0.10129	0.999638	1	1	2	1	7	9
PPTDRAFT_01579	hypothetical protein	6.28607	0.603592	0.450969	0.999638	2	12	15	3	1	13
PPTDRAFT_01580	hypothetical protein	7.16304	1.7908	0.319233	0.999638	3	4	12	7	7	13
PPTDRAFT_01581	hypothetical protein	77.8245	1.10043	0.644806	0.999638	46	82	122	94	37	120
PPTDRAFT_01582	DNA-binding transcriptional regulator,	444.561	0.950447	0.634395	0.999638	337	542	536	399	283	519
PPTDRAFT_01583	hypothetical protein	240.53	1.00923	0.94088	0.999638	186	244	341	257	135	317
PPTDRAFT_01584	hypothetical protein	19.4161	1.09871	0.790459	0.999638	16	17	26	18	14	26
PPTDRAFT_01585	hypothetical protein	4.63596	0.478408	0.34063	0.999638	4	7	9	1	1	11
PPTDRAFT_01586	hypothetical protein	4.94975	0.592243	0.482981	0.999638	1	9	12	4	3	2
PPTDRAFT_01587	hypothetical protein	943.579	0.986447	0.86606	0.999638	715	983	1358	879	612	1194
PPTDRAFT_01588	hypothetical protein	67.529	0.903635	0.61469	0.999638	57	59	129	50	38	115
PPTDRAFT_01589	hypothetical protein	173.592	1.11519	0.462724	0.999638	131	126	303	244	70	274
PPTDRAFT_01590	hypothetical protein	68.6607	1.05473	0.790485	0.999638	40	78	104	64	46	92
PPTDRAFT_01591	RNA dependent RNA polymerase	84.1723	0.96847	0.860193	0.999638	50	106	123	63	60	110
PPTDRAFT_01592	hypothetical protein	18.9327	0.668647	0.296389	0.999638	15	25	31	5	14	27
PPTDRAFT_01593	hypothetical protein	21.9519	0.966465	0.922915	0.999638	16	22	36	10	15	46
PPTDRAFT_01594	hypothetical protein	70.0105	0.974072	0.895199	0.999638	43	75	128	44	45	129
PPTDRAFT_01595	hypothetical protein	85.4059	1.02887	0.876431	0.999638	35	101	170	47	60	163
PPTDRAFT_01596	hypothetical protein	92.588	1.11423	0.528458	0.999638	58	77	180	82	59	163
PPTDRAFT_01597	hypothetical protein	47.055	0.736634	0.196475	0.999638	29	60	97	22	32	65
PPTDRAFT_01598	hypothetical protein	152.964	1.00021	0.998878	0.999638	77	184	268	88	107	275
PPTDRAFT_01599	hypothetical protein	41.1501	0.987851	0.961999	0.999638	21	44	88	29	21	87
PPTDRAFT_01600	hypothetical protein	32.1671	1.00369	0.989591	0.999638	16	26	88	23	18	66
PPTDRAFT_01601	Ig-like domain (group 2)	90.65	0.911225	0.605714	0.999638	59	106	158	69	51	145
PPTDRAFT_01602	hypothetical protein	43.4662	1.14929	0.566794	0.999638	22	40	85	29	32	85
PPTDRAFT_01603	hypothetical protein	44.7037	0.951767	0.836659	0.999638	30	34	112	33	23	91
PPTDRAFT_01604	hypothetical protein	60.6414	0.885071	0.573781	0.999638	40	60	126	29	42	112
PPTDRAFT_01605	hypothetical protein	89.4728	0.877888	0.459782	0.999638	55	101	179	60	54	144
PPTDRAFT_01606	hypothetical protein	19.7573	1.21481	0.603099	0.999638	5	23	43	16	11	42
PPTDRAFT_01607	hypothetical protein	16.4989	0.917772	0.827276	0.999638	8	19	37	10	8	36
PPTDRAFT_01608	hypothetical protein	25.1406	1.26334	0.465437	0.999638	14	29	29	22	18	41
PPTDRAFT_01609	Cell wall-associated hydrolases	111.139	1.00758	0.9631	0.999638	69	119	191	77	73	194
PPTDRAFT_01610	phage minor structural protein, N-terminal	61.7191	0.955664	0.832019	0.999638	46	64	101	42	38	108
PPTDRAFT_01611	FOG: Ankyrin repeat	1613.07	0.951299	0.499411	0.999638	1115	1816	2438	1365	1103	1986
PPTDRAFT_01612	hypothetical protein	3627.75	0.978148	0.756266	0.999638	2852	3553	5637	3369	2158	5159
PPTDRAFT_01613	Acetyltransferases	3903.27	0.966934	0.643612	0.999638	2767	4715	4889	3373	2745	4378
PPTDRAFT_01614	mRNA interferase MazF	20.6575	1.00507	0.988547	0.999638	18	19	30	24	8	34
PPTDRAFT_01615	hypothetical protein	13.942	0.814134	0.629011	0.999638	11	19	19	10	7	20
PPTDRAFT_01616	YkyB-like protein	69.3932	1.17023	0.420177	0.999638	49	62	96	64	54	95
PPTDRAFT_01617	hypothetical protein	39.3825	1.26794	0.367291	0.999638	18	46	54	35	27	68
PPTDRAFT_01618	hypothetical protein	56.954	0.819394	0.350596	0.999638	51	56	97	52	33	63
PPTDRAFT_01619	hypothetical protein	48.4726	1.01308	0.95517	0.999638	28	58	72	38	36	63
PPTDRAFT_01620	hypothetical protein	22.0125	0.85851	0.65445	0.999638	15	29	33	13	14	33
PPTDRAFT_01621	hypothetical protein	25.4146	0.960735	0.901362	0.999638	15	35	34	15	17	41
PPTDRAFT_01622	hypothetical protein	49.3062	0.973768	0.909559	0.999638	33	59	70	47	29	64
PPTDRAFT_01623	hypothetical protein	49.3998	1.0182	0.939915	0.999638	29	61	74	42	28	80
PPTDRAFT_01624	hypothetical protein	18.5256	1.01907	0.959177	0.999638	15	14	34	12	14	31
PPTDRAFT_01625	hypothetical protein	26.7397	0.967336	0.914559	0.999638	18	25	47	20	23	30
PPTDRAFT_01626	hypothetical protein	53.5753	1.01486	0.947392	0.999638	32	54	98	51	35	72
PPTDRAFT_01627	hypothetical protein	21.9902	0.765661	0.470243	0.999638	16	22	46	5	15	48
PPTDRAFT_01628	hypothetical protein	41.7673	0.771538	0.308147	0.999638	31	52	76	33	19	60
PPTDRAFT_01629	hypothetical protein	28.7831	1.09083	0.775807	0.999638	15	28	57	32	14	49
PPTDRAFT_01630	hypothetical protein	133.734	1.11652	0.460822	0.999638	75	137	226	106	91	233
PPTDRAFT_01631	hypothetical protein	40.3481	1.10227	0.707877	0.999638	21	53	51	27	30	64
PPTDRAFT_01632	hypothetical protein	23.5479	1.13857	0.696528	0.999638	17	28	22	27	14	28
PPTDRAFT_01633	hypothetical protein	8.07447	0.791292	0.673825	0.999638	4	10	20	5	3	17
PPTDRAFT_01634	hypothetical protein	27.603	1.26783	0.439601	0.999638	13	32	32	29	23	30
PPTDRAFT_01636	homoserine O-succinyltransferase	2535.91	0.877676	0.0665911	0.999638	2034	1872	6203	1943	1195	4832
PPTDRAFT_01637	cystathionine gamma-synthase	1569.59	0.957134	0.559084	0.999638	1224	744	4683	1479	517	3473
PPTDRAFT_01638	cystathionine beta-lyase	3139.22	0.9708	0.660321	0.999638	2762	1730	7637	3083	1230	6211
PPTDRAFT_01639	de-hypoxanthine futalosine cyclase	557.113	0.892198	0.205078	0.999638	493	420	1183	528	247	930
PPTDRAFT_01640	Uncharacterized membrane-anchored protein YitT,	17.2151	1.38893	0.396794	0.999638	7	15	32	20	9	36
PPTDRAFT_01641	monovalent cation:H+ antiporter-2, CPA2 family	16.8587	0.974848	0.947056	0.999638	9	16	39	15	10	26
PPTDRAFT_01642	potassium/proton antiporter regulatory subunit,	21.6556	0.953998	0.889475	0.999638	17	17	44	16	15	33
PPTDRAFT_01643	hypothetical protein	45.0086	1.02665	0.914843	0.999638	35	40	61	47	37	38
PPTDRAFT_01644	putative sporulation protein YtxC	9.7489	1.48704	0.472001	0.999638	7	13	4	11	4	19
PPTDRAFT_01645	3D (Asp-Asp-Asp) domain-containing protein	3.84909	0.920447	0.921974	0.999638	2	4	6	0	4	9
PPTDRAFT_01646	small acid-soluble spore protein E (minor	402.792	0.921735	0.412119	0.999638	435	282	630	516	170	481
PPTDRAFT_01647	serine protease, S1-C subfamily, contains	489.443	0.934363	0.482186	0.999638	393	387	1023	502	222	794
PPTDRAFT_01648	hypothetical protein	16.3634	0.923672	0.845241	0.999638	13	10	38	17	12	15
PPTDRAFT_01649	two-component system, OmpR family, response	21.8845	1.00443	0.9899	0.999638	16	16	48	22	6	54
PPTDRAFT_01650	Signal transduction histidine kinase	67.7399	0.87839	0.524512	0.999638	63	40	167	63	33	104
PPTDRAFT_01651	4-hydroxy-3-methylbut-2-enyl diphosphate	383.49	0.988198	0.910487	0.999638	337	263	777	338	187	732
PPTDRAFT_01652	3-deoxy-D-arabinoheptulosonate-7-phosphate	97.3635	1.23173	0.242825	0.999638	62	38	268	118	28	247
PPTDRAFT_01653	glutamine synthetase	3362.39	0.990031	0.885419	0.999638	2792	2533	6464	3534	1813	4884
PPTDRAFT_01654	hypothetical protein	152.413	1.08599	0.557301	0.999638	102	112	327	139	91	272
PPTDRAFT_01655	phosphoserine aminotransferase apoenzyme	918.414	0.987652	0.876776	0.999638	573	715	2265	642	506	1930
PPTDRAFT_01656	tRNA (cytidine/uridine-2'-O-)-methyltransferase	443.295	1.00657	0.945969	0.999638	321	455	672	382	296	618
PPTDRAFT_01657	transcriptional pleiotropic regulator of	6170.75	1.01814	0.812174	0.999638	4858	6768	6829	6878	4012	6037
PPTDRAFT_01658	Predicted protein (DUF2233)	97.7743	1.06336	0.727775	0.999638	69	70	204	75	72	159
PPTDRAFT_01659	hypothetical protein	44.7104	1.1332	0.603922	0.999638	38	36	63	42	29	71
PPTDRAFT_01660	two component transcriptional regulator, LuxR	453.341	0.995013	0.959756	0.999638	328	384	901	449	231	753
PPTDRAFT_01661	2-aminoadipate transaminase	275.233	1.08041	0.494899	0.999638	204	207	522	264	174	433
PPTDRAFT_01662	hypothetical protein	11.0407	1.07203	0.886383	0.999638	10	4	27	12	2	31
PPTDRAFT_01663	putative serine protein kinase, PrkA	25.7312	1.0515	0.872723	0.999638	22	20	44	23	13	50
PPTDRAFT_01664	Protoglobin	86.1636	1.02282	0.898682	0.999638	62	79	148	84	53	123
PPTDRAFT_01665	heam-based aerotactic trancducer	174.319	0.997466	0.984825	0.999638	93	194	320	125	127	258
PPTDRAFT_01666	Arylamine N-acetyltransferase	13.8589	0.735967	0.476304	0.999638	9	14	38	10	4	29
PPTDRAFT_01667	Ser/Thr protein kinase RdoA involved in Cpx	6.25166	1.23302	0.735977	0.999638	4	4	11	6	6	7
PPTDRAFT_01668	Ser/Thr protein kinase RdoA involved in Cpx	4.17096	1.30455	0.736407	0.999638	6	1	4	8	1	5
PPTDRAFT_01669	Uncharacterized membrane protein YkoI	84.4232	0.885748	0.532913	0.999638	68	92	137	64	41	149
PPTDRAFT_01670	Peptidase propeptide and YPEB domain-containing	25.8427	1.29344	0.419309	0.999638	21	10	57	25	14	58
PPTDRAFT_01671	Signal transduction histidine kinase	38.4136	0.936117	0.802027	0.999638	23	32	96	19	23	87
PPTDRAFT_01672	DNA-binding response regulator, OmpR family,	27.4457	0.895373	0.720574	0.999638	21	18	73	16	16	55
PPTDRAFT_01673	two-component system, OmpR family, alkaline	12.9515	1.50566	0.355618	0.999638	8	5	28	19	6	26
PPTDRAFT_01674	Signal transduction histidine kinase	29.3385	0.890741	0.695616	0.999638	29	18	66	26	11	58
PPTDRAFT_01675	hypothetical protein	35.7666	0.955055	0.864444	0.999638	36	19	79	34	16	64
PPTDRAFT_01676	stage V sporulation protein R	48.0816	1.03281	0.890025	0.999638	38	35	94	57	21	79
PPTDRAFT_01677	hypothetical protein	31.0268	1.1776	0.567667	0.999638	27	19	52	31	20	51
PPTDRAFT_01678	DNA-binding response regulator, OmpR family,	73.6772	1.05118	0.795341	0.999638	42	82	120	61	50	111
PPTDRAFT_01679	His Kinase A (phospho-acceptor)	40.966	0.798925	0.375067	0.999638	28	43	93	23	22	75
PPTDRAFT_01680	ABC-2 type transport system ATP-binding protein	16.9813	1.08111	0.839397	0.999638	10	11	44	10	10	42
PPTDRAFT_01681	hypothetical protein	15.9402	1.41699	0.39877	0.999638	6	9	42	20	9	30
PPTDRAFT_01682	hypothetical protein	19.3231	1.00749	0.983632	0.999638	11	18	43	16	8	44
PPTDRAFT_01683	Lantibiotic modifying enzyme	10.4217	0.87547	0.792897	0.999638	13	6	18	5	7	18
PPTDRAFT_01684	hypothetical protein	49.5579	0.99003	0.9648	0.999638	40	47	72	48	34	57
PPTDRAFT_01685	Lantibiotic modifying enzyme	12.9863	0.873754	0.75626	0.999638	14	8	27	11	6	22
PPTDRAFT_01686	two-component system, OmpR family, response	10.218	0.973482	0.955957	0.999638	9	6	23	12	4	17
PPTDRAFT_01687	thiopeptide-type bacteriocin biosynthesis	29.4096	1.117	0.70835	0.999638	21	18	66	22	19	60
PPTDRAFT_01688	ATP-binding cassette, subfamily B	113.955	1.06594	0.684251	0.999638	77	117	165	105	81	149
PPTDRAFT_01689	Branched-chain amino acid transport protein	28.3534	0.671633	0.188317	0.999638	29	28	57	27	9	37
PPTDRAFT_01690	4-azaleucine resistance probable transporter	21.3433	0.779237	0.487433	0.999638	25	10	55	14	11	34
PPTDRAFT_01691	Fucose permease	19.4305	1.35843	0.393462	0.999638	16	9	34	23	12	34
PPTDRAFT_01692	transcriptional regulator, XRE family with cupin	46.865	1.01233	0.959379	0.999638	34	29	116	54	20	80
PPTDRAFT_01693	Acyl-CoA hydrolase	103.703	0.877781	0.435163	0.999638	76	74	280	76	41	231
PPTDRAFT_01694	Beta-xylosidase	2.27542	0.167241	0.14016	0.999638	1	4	8	3	0	0
PPTDRAFT_01695	4'-phosphopantetheinyl transferase	45.4232	1.25603	0.34426	0.999638	34	32	74	44	25	97
PPTDRAFT_01696	hypothetical protein	66.0401	1.11831	0.592977	0.999638	34	50	163	65	35	126
PPTDRAFT_01697	Spore germination protein YaaH	6.1569	0.552425	0.346337	0.999638	7	7	11	6	2	5
PPTDRAFT_01698	EDD domain protein, DegV family	203.116	1.03286	0.795772	0.999638	172	125	433	219	86	380
PPTDRAFT_01699	hypothetical protein	151.173	1.0113	0.937053	0.999638	111	112	329	155	69	275
PPTDRAFT_01700	Uncharacterized membrane protein YgdD,	81.8225	0.977779	0.904861	0.999638	73	60	149	69	55	116
PPTDRAFT_01701	hypothetical protein	1059.8	0.9751	0.760137	0.999638	789	1106	1623	933	656	1499
PPTDRAFT_01702	kanamycin nucleotidyltransferase	105.136	0.9856	0.929083	0.999638	74	81	238	89	59	186
PPTDRAFT_01703	translation initiation factor IF-3	21.8981	0.669477	0.254687	0.999638	20	18	59	15	5	48
PPTDRAFT_01704	iron complex transport system substrate-binding	348.301	0.962423	0.725367	0.999638	269	283	703	259	222	583
PPTDRAFT_01705	iron complex transport system permease protein	392.736	1.03706	0.717099	0.999638	277	356	676	378	256	545
PPTDRAFT_01706	transcriptional regulator, ArsR family	146.758	1.17499	0.252421	0.999638	99	119	248	143	98	239
PPTDRAFT_01707	Predicted arabinose efflux permease, MFS family	1.91783	2.29269	0.475065	0.999638	0	1	4	1	3	3
PPTDRAFT_01708	hypothetical protein	87.7795	0.901056	0.565249	0.999638	62	86	171	87	49	112
PPTDRAFT_01709	hypothetical protein	42.7686	0.86712	0.584793	0.999638	39	35	85	26	20	93
PPTDRAFT_01710	N-acetylglutamate synthase and related	45.3064	1.15537	0.544035	0.999638	37	29	80	57	22	74
PPTDRAFT_01711	AloR4 receptor	562.976	0.972533	0.775079	0.999638	351	628	963	471	347	838
PPTDRAFT_01712	AloP4 peptide	759.827	1.06293	0.530599	0.999638	509	817	1062	790	470	1001
PPTDRAFT_01713	AloR5 receptor	108.28	1.04973	0.763554	0.999638	70	95	215	92	62	201
PPTDRAFT_01714	WXG100 family type VII secretion target	22.8445	1.02207	0.947754	0.999638	16	17	50	14	15	47
PPTDRAFT_01715	hypothetical protein	27.0861	0.886929	0.696338	0.999638	19	34	41	22	15	38
PPTDRAFT_01716	hypothetical protein	19.1369	0.661255	0.252972	0.999638	18	19	42	11	11	24
PPTDRAFT_01717	Cysteine-rich CPCC	90.7696	1.07672	0.686423	0.999638	62	88	138	110	49	121
PPTDRAFT_01718	hypothetical protein	21.8039	0.901227	0.77246	0.999638	20	21	34	13	10	49
PPTDRAFT_01719	protein of unknown function (DUF1871)	3.31199	0.118704	0.0438828	0.999638	3	6	10	3	0	0
PPTDRAFT_01720	hypothetical protein	1314.7	1.00407	0.961336	0.999638	979	1371	1890	1310	790	1737
PPTDRAFT_01721	amidase	2173.86	0.980323	0.780394	0.999638	1565	1944	4198	1803	1244	3758
PPTDRAFT_01722	AloR6 receptor	223.908	0.977103	0.850491	0.999638	150	220	416	158	144	387
AloP6_peptide	AloP6 peptide	195.656	0.846978	0.226004	0.999638	137	263	278	153	116	238
PPTDRAFT_01723	SsrA-binding protein	2.03262	1.08313	0.942598	0.999638	2	1	3	4	0	4
PPTDRAFT_01724	hypothetical protein	5.15982	1.4733	0.600738	0.999638	0	7	11	6	3	8
PPTDRAFT_01725	hypothetical protein	3.72075	1.0104	0.989576	0.999638	4	2	7	3	2	7
PPTDRAFT_01726	putative RNA 2'-phosphotransferase	47.3025	1.141	0.571263	0.999638	38	41	60	46	36	59
PPTDRAFT_01727	Uncharacterized protein YunC, DUF1805 family	80.0223	1.01329	0.942807	0.999638	89	53	107	106	37	94
PPTDRAFT_01728	methylthioribose-1-phosphate isomerase	653.042	1.05379	0.541148	0.999638	488	436	1448	625	312	1297
PPTDRAFT_01729	5'-methylthioribose kinase	1023.13	0.979063	0.79267	0.999638	755	742	2368	839	486	2128
PPTDRAFT_01730	starvation-inducible DNA-binding protein	200.682	0.788392	0.0748816	0.999638	143	243	368	114	122	305
PPTDRAFT_01731	Fe-S cluster assembly ATP-binding protein	1279.75	1.01956	0.794119	0.999638	982	965	2602	1183	703	2214
PPTDRAFT_01732	Fe-S cluster assembly protein SufD	1338.77	1.02689	0.747715	0.999638	935	877	3293	976	716	2944
PPTDRAFT_01733	L-selenocysteine selenide-lyase	1242.7	0.97018	0.722042	0.999638	934	829	3050	897	634	2663
PPTDRAFT_01734	nitrogen fixation protein NifU	378.993	0.948809	0.610586	0.999638	292	280	869	312	174	771
PPTDRAFT_01735	Fe-S cluster assembly protein SufB	4828.92	0.994328	0.934621	0.999638	3154	3941	10841	3378	2984	9239
PPTDRAFT_01736	YmaF family protein	218.589	0.967408	0.787089	0.999638	201	207	282	244	123	246
PPTDRAFT_01737	Mn-containing catalase	35.3155	0.879643	0.632093	0.999638	27	29	82	25	19	64
PPTDRAFT_01738	Mn-containing catalase	17.6852	1.24608	0.580643	0.999638	11	16	25	26	5	36
PPTDRAFT_01739	HDIG domain-containing protein	553.853	1.01775	0.847324	0.999638	453	371	1161	607	254	940
PPTDRAFT_01740	2',3'-cyclic-nucleotide 2'-phosphodiesterase/5'-	191.637	0.970532	0.820383	0.999638	161	147	376	155	109	336
PPTDRAFT_01741	HD-GYP domain, c-di-GMP phosphodiesterase class	115.959	1.14246	0.4275	0.999638	68	74	287	105	75	206
PPTDRAFT_01742	radical SAM/CxCxxxxC motif protein YfkAB	268.662	0.994449	0.960876	0.999638	183	197	647	219	147	509
PPTDRAFT_01743	Hemolysin, contains CBS domains	271.861	1.08346	0.474138	0.999638	202	207	517	266	147	490
PPTDRAFT_01744	spore coat protein JA	1.07564	0.202413	0.340786	0.999638	2	0	4	0	1	0
PPTDRAFT_01745	spore coat protein JB	1.0972	5.36022	0.286327	0.999638	1	0	0	2	1	2
PPTDRAFT_01746	spore coat protein JC	7.92275	0.799267	0.709137	0.999638	3	15	9	1	6	14
PPTDRAFT_01747	Glycosyltransferase involved in cell wall	2.94134	0.912376	0.922269	0.999638	1	2	9	3	3	1
PPTDRAFT_01748	Methyltransferase domain-containing protein	3.31399	0.928535	0.933025	0.999638	3	1	8	1	4	4
PPTDRAFT_01749	Methylase involved in ubiquinone/menaquinone	1.25647	0.786257	0.861512	0.999638	1	1	2	3	0	1
PPTDRAFT_01750	Phosphoglycolate phosphatase, HAD superfamily	282.04	0.961278	0.723429	0.999638	255	174	618	298	108	523
PPTDRAFT_01751	Glutathione synthase/RimK-type ligase, ATP-grasp	14.8252	1.51618	0.313331	0.999638	16	7	13	22	9	19
PPTDRAFT_01752	hypothetical protein	5.19241	0.589847	0.470325	0.999638	4	6	8	10	1	2
PPTDRAFT_01753	YheC/D like ATP-grasp	12.7516	0.8574	0.725204	0.999638	16	9	18	14	6	14
PPTDRAFT_01754	YheC/D like ATP-grasp	23.69	1.00673	0.983832	0.999638	26	16	27	40	9	21
PPTDRAFT_01755	Glutathione synthase/Ribosomal protein S6	10.8383	1.46584	0.433362	0.999638	13	5	9	17	4	18
PPTDRAFT_01756	YheC/D like ATP-grasp	8.85159	1.96504	0.242376	0.999638	10	2	5	22	1	14
PPTDRAFT_01757	Cell fate regulator YlbF, YheA/YmcA/DUF963	205.284	1.00872	0.94439	0.999638	180	137	407	213	104	332
PPTDRAFT_01758	hypothetical protein	109.129	0.843974	0.314613	0.999638	77	127	200	80	56	177
PPTDRAFT_01759	Predicted transcriptional regulator containing	41.4451	1.10342	0.695985	0.999638	29	27	91	34	28	74
PPTDRAFT_01760	hypothetical protein	1.02675	2.60292	0.579414	0.999638	1	0	0	1	2	0
PPTDRAFT_01761	Sporulation protein YtrH	0.173242	1.12617	0.965985	NA	0	0	1	0	0	1
PPTDRAFT_01762	DNA polymerase-3 subunit alpha	246.845	1.02201	0.855101	0.999638	182	189	509	193	154	443
PPTDRAFT_01763	Phosphatidylglycerophosphatase A	105.225	1.18269	0.306862	0.999638	80	65	207	100	58	216
PPTDRAFT_01764	hypothetical protein	134.964	1.16247	0.305345	0.999638	100	98	237	153	74	226
PPTDRAFT_01765	acetyl-CoA carboxylase carboxyl transferase	440.093	0.999792	0.998269	0.999638	320	326	987	404	224	803
PPTDRAFT_01766	acetyl-CoA carboxylase carboxyl transferase	468.015	0.976348	0.805931	0.999638	353	305	1165	402	236	883
PPTDRAFT_01767	pyruvate kinase	2335.61	0.944128	0.441436	0.999638	1519	1705	6280	1684	1277	4507
PPTDRAFT_01768	DNA-binding transcriptional regulator, LysR	11.902	1.51572	0.374439	0.999638	5	7	23	10	13	17
PPTDRAFT_01769	phosphate ABC transporter substrate-binding	7.41949	1.07447	0.899087	0.999638	6	7	9	10	4	8
PPTDRAFT_01770	phosphate transport system permease protein	1.36522	1.58429	0.731778	0.999638	1	1	1	2	0	5
PPTDRAFT_01771	phosphate ABC transporter membrane protein 2,	1.40558	0.842796	0.908637	0.999638	1	0	3	5	0	0
PPTDRAFT_01772	phosphate ABC transporter ATP-binding protein,	6.07159	0.808199	0.738268	0.999638	9	3	9	8	2	6
PPTDRAFT_01773	pectate lyase, PelA/Pel-15E family	21.9778	1.55379	0.200994	0.999638	9	20	29	28	17	31
PPTDRAFT_01774	acyl-CoA thioester hydrolase	77.2675	0.931334	0.705284	0.999638	67	67	138	74	37	124
PPTDRAFT_01775	UPF0716 protein FxsA	73.6833	0.871559	0.487783	0.999638	68	48	173	57	41	118
PPTDRAFT_01776	sporulation integral membrane protein YtvI	4.59969	1.05797	0.937973	0.999638	5	2	9	3	3	9
PPTDRAFT_01777	citrate synthase	807.662	0.894655	0.177677	0.999638	621	724	1666	714	422	1250
PPTDRAFT_01778	isocitrate dehydrogenase (NADP)	1809.5	1.00447	0.949844	0.999638	1315	1175	4497	1573	851	3712
PPTDRAFT_01779	malate dehydrogenase (NAD)	591.145	1.04482	0.618976	0.999638	426	401	1356	538	300	1158
PPTDRAFT_01780	hypothetical protein	572.445	0.930697	0.461145	0.999638	452	658	751	537	347	674
PPTDRAFT_01781	NAD(P)-dependent dehydrogenase, short-chain	31.7275	1.05118	0.861185	0.999638	28	23	52	43	12	49
PPTDRAFT_01782	two-component system, OmpR family, phosphate	150.713	0.975566	0.860857	0.999638	117	108	340	129	71	301
PPTDRAFT_01783	two-component system, OmpR family, alkaline	192.922	1.01463	0.912141	0.999638	173	118	401	184	102	330
PPTDRAFT_01784	methyl-accepting chemotaxis protein	4.94249	2.7165	0.183377	0.999638	1	1	12	8	3	12
PPTDRAFT_01785	phosphate ABC transporter ATP-binding protein,	6.87037	0.905829	0.868629	0.999638	7	4	15	6	2	16
PPTDRAFT_01786	phosphate transport system protein	15.484	1.06642	0.873575	0.999638	12	13	22	10	15	19
PPTDRAFT_01787	DNA polymerase I	266.855	1.07066	0.550942	0.999638	213	161	589	252	134	524
PPTDRAFT_01788	DNA-(apurinic or apyrimidinic site) lyase	272.936	0.941481	0.594654	0.999638	205	208	626	237	148	455
PPTDRAFT_01789	putative sporulation protein YtaF	97.1161	0.927072	0.659246	0.999638	69	53	297	83	33	223
PPTDRAFT_01790	dephospho-CoA kinase	62.415	0.847932	0.423208	0.999638	50	48	155	48	28	117
PPTDRAFT_01791	soluble lytic murein transglycosylase	124.827	0.957276	0.773565	0.999638	99	85	293	118	58	225
PPTDRAFT_01792	Small, acid-soluble spore protein, alpha/beta	287.057	1.00334	0.976918	0.999638	285	205	408	407	134	308
PPTDRAFT_01793	transcriptional repressor NrdR	274.396	1.005	0.966398	0.999638	191	250	508	286	150	404
PPTDRAFT_01794	tRNA_Ala_GGC	743.424	1.03418	0.882037	0.999638	181	881	1212	173	998	863
PPTDRAFT_01795	tRNA_Lys_CTT	1838.22	1.18383	0.0377425	0.999638	292	2377	3089	411	2260	2691
PPTDRAFT_01796	hypothetical protein	265.662	0.989863	0.935162	0.999638	177	337	322	250	173	302
PPTDRAFT_01797	Predicted acetyltransferase	42.1788	1.14527	0.580692	0.999638	25	36	81	38	26	78
PPTDRAFT_01798	hypothetical protein	10.5218	1.06714	0.894514	0.999638	5	13	18	8	5	23
PPTDRAFT_01799	Acetyltransferases	6.60661	0.805913	0.728134	0.999638	2	11	14	5	3	9
PPTDRAFT_01800	DNA-binding transcriptional regulator, MerR	10.5186	0.790866	0.6344	0.999638	8	15	15	8	4	17
PPTDRAFT_01801	radical SAM additional 4Fe4S-binding SPASM	398.806	1.02478	0.80458	0.999638	268	381	703	353	256	602
PPTDRAFT_01802	iron complex transport system substrate-binding	134.067	0.894772	0.452709	0.999638	108	122	262	111	70	219
PPTDRAFT_01803	methyl-accepting chemotaxis protein	13.3629	1.01263	0.976639	0.999638	6	13	32	8	9	26
PPTDRAFT_01804	putative cofactor-binding repeat-containing	11.8374	1.36792	0.496581	0.999638	6	9	22	9	6	35
PPTDRAFT_01805	3-methyladenine DNA glycosylase AlkC	18.3783	0.989221	0.976647	0.999638	9	17	46	16	10	32
PPTDRAFT_01806	CRP/FNR family transcriptional regulator,	39.1504	0.963986	0.892278	0.999638	29	29	81	25	34	52
PPTDRAFT_01807	Ankyrin repeat	130.927	1.09042	0.584081	0.999638	92	142	168	105	90	205
PPTDRAFT_01808	transcriptional regulator, DeoR family	1347.97	0.946329	0.456439	0.999638	1094	1164	2501	1272	729	2042
PPTDRAFT_01809	fructose-1-phosphate kinase (EC 2.7.1.56)	573.247	1.03885	0.686215	0.999638	390	328	1575	492	273	1215
PPTDRAFT_01810	PTS system D-fructose-specific IIA component	1994.37	0.912673	0.198427	0.999638	1541	1366	5091	1800	851	3747
PPTDRAFT_01811	DNA-binding transcriptional regulator, LysR	28.0329	1.05882	0.851783	0.999638	16	19	73	20	20	50
PPTDRAFT_01812	Tautomerase enzyme	8.33669	1.42935	0.520302	0.999638	6	5	12	4	7	22
PPTDRAFT_01813	4-carboxymuconolactone decarboxylase	18.4296	0.812081	0.56898	0.999638	17	19	27	15	13	17
PPTDRAFT_01814	transcriptional antiterminator, BglG family	39.1198	0.952717	0.852863	0.999638	26	48	56	38	22	50
PPTDRAFT_01815	PTS system, beta-glucosides-specific IIC	7.25736	0.945513	0.922529	0.999638	6	5	15	10	3	9
PPTDRAFT_01816	6-phospho-beta-glucosidase	31.9966	0.936157	0.815535	0.999638	27	26	63	24	17	60
PPTDRAFT_01817	DNA-binding transcriptional regulator, LysR	23.6596	0.997839	0.994819	0.999638	14	15	69	24	11	42
PPTDRAFT_01818	Methionine synthase II (cobalamin-independent)	4840.33	1.05531	0.424431	0.999638	3321	3164	11837	4293	2488	9658
PPTDRAFT_01819	hypothetical protein	9.70234	0.773221	0.61345	0.999638	8	9	22	5	4	22
PPTDRAFT_01820	2-aminoethylphosphonate-pyruvate transaminase	733.041	0.931698	0.446271	0.999638	559	579	1625	512	397	1454
PPTDRAFT_01821	Methyltransferase domain-containing protein	271.648	0.914713	0.424069	0.999638	193	251	566	216	158	433
PPTDRAFT_01822	phosphonopyruvate decarboxylase	262.652	0.928893	0.526821	0.999638	178	226	608	213	125	508
PPTDRAFT_01823	phosphoenolpyruvate mutase	317.201	1.00036	0.997369	0.999638	259	225	653	339	137	566
PPTDRAFT_01824	Arylsulfatase A	2071.84	0.995693	0.955039	0.999638	1454	2196	3202	1783	1317	3012
PPTDRAFT_01825	hypothetical protein	2.49696	1.28307	0.796445	0.999638	2	1	5	4	1	4
PPTDRAFT_01826	hypothetical protein	421.494	1.04232	0.696073	0.999638	426	318	472	655	197	387
PPTDRAFT_01827	hypothetical protein	48.3292	0.904644	0.66517	0.999638	41	37	101	49	25	67
PPTDRAFT_01828	Exopolysaccharide biosynthesis protein	67.4647	0.817731	0.314343	0.999638	53	55	167	57	34	100
PPTDRAFT_01829	hypothetical protein	17.0239	1.35781	0.443756	0.999638	6	13	39	22	9	31
PPTDRAFT_01830	hypothetical protein	73.4133	1.15808	0.443144	0.999638	55	42	159	78	36	146
PPTDRAFT_01831	SMI1 / KNR4 family (SUKH-1)	146.097	1.02127	0.891096	0.999638	114	114	284	121	66	325
PPTDRAFT_01832	molecular chaperone HtpG	1731.34	0.96262	0.607643	0.999638	1198	1368	4012	1252	951	3452
PPTDRAFT_01833	Colicin immunity protein / pyocin immunity	18.84	0.774842	0.498339	0.999638	17	11	54	14	4	48
PPTDRAFT_01834	carboxynorspermidine dehydrogenase	2750.71	0.941255	0.42116	0.999638	2118	2098	6173	2057	1529	5113
PPTDRAFT_01835	carboxynorspermidine decarboxylase (EC 4.1.1.-)	1972.97	0.962823	0.593916	0.999638	1352	1531	4699	1469	1077	3859
PPTDRAFT_01836	hypothetical protein	102.482	0.83733	0.321174	0.999638	92	92	193	61	65	164
PPTDRAFT_01837	hypothetical protein	66.4876	0.819324	0.356435	0.999638	79	44	125	49	35	100
PPTDRAFT_01838	hypothetical protein	96.1231	0.834915	0.291819	0.999638	84	84	190	80	58	121
PPTDRAFT_01839	Ribosomal protein S18 acetylase RimI	45.0256	1.09091	0.717649	0.999638	39	27	88	44	26	77
PPTDRAFT_01840	putative acetyltransferase	5.08473	0.962999	0.955977	0.999638	6	4	6	6	2	7
PPTDRAFT_01841	tRNA_Leu_CAG	245.529	1.00452	0.971823	0.999638	196	237	314	191	217	250
PPTDRAFT_01842	Putative NADPH-quinone reductase (modulator of	57.1752	1.07372	0.741195	0.999638	44	52	86	47	39	91
PPTDRAFT_01843	transcriptional regulator, HxlR family	151.649	0.977437	0.878116	0.999638	111	138	280	167	71	232
PPTDRAFT_01844	enoyl-[acyl-carrier protein] reductase /	412.002	1.03605	0.732081	0.999638	335	248	925	442	203	689
PPTDRAFT_01845	hypothetical protein	0	#VALUE!	NA	NA	0	0	0	0	0	0
PPTDRAFT_01846	glycerol-1-phosphate dehydrogenase [NAD(P)+]	16.2273	1.02183	0.956974	0.999638	21	5	31	20	6	25
PPTDRAFT_01847	transcriptional regulator, GntR family	55.4388	0.940961	0.779006	0.999638	47	46	104	56	26	88
PPTDRAFT_01848	hypothetical protein	375.097	0.987529	0.905764	0.999638	268	262	909	321	211	656
PPTDRAFT_01849	hypothetical protein	155.079	1.08755	0.609946	0.999638	66	195	263	137	96	241
PPTDRAFT_01850	hypothetical protein	373.731	1.05905	0.572124	0.999638	207	423	579	285	291	514
PPTDRAFT_01851	hypothetical protein	138.042	1.18228	0.252901	0.999638	89	143	168	139	104	172
PPTDRAFT_01852	Peptidoglycan/xylan/chitin deacetylase,	4991.2	1.01404	0.830327	0.999638	3706	4232	9377	4450	2868	8441
PPTDRAFT_01853	toxin secretion/phage lysis holin	3.95173	1.71282	0.49878	0.999638	2	1	10	6	2	8
PPTDRAFT_01854	Stress responsive A/B Barrel Domain	171.013	0.890999	0.388197	0.999638	157	110	399	162	72	297
PPTDRAFT_01855	Uncharacterized conserved protein YutE,	160.388	1.09529	0.517851	0.999638	109	80	440	125	68	420
PPTDRAFT_01856	Predicted transcriptional regulator, ArsR family	239.844	0.895513	0.35771	0.999638	195	128	701	193	89	525
PPTDRAFT_01857	Gas vesicle protein	264.374	1.04061	0.727505	0.999638	186	163	667	245	120	552
PPTDRAFT_01858	glutamate racemase	116.351	1.09408	0.566236	0.999638	91	78	230	131	54	210
PPTDRAFT_01859	g-D-glutamyl-meso-diaminopimelate peptidase	9.75209	1.06267	0.902258	0.999638	8	9	14	10	5	16
PPTDRAFT_01860	hypothetical protein	42.0713	1.15797	0.550479	0.999638	39	31	53	50	26	54
PPTDRAFT_01861	Fe-S cluster assembly iron-binding protein IscA	260.35	1.07665	0.535156	0.999638	187	191	527	293	125	449
PPTDRAFT_01862	Uncharacterized protein conserved in bacteria	159.969	0.946398	0.689418	0.999638	108	127	387	133	85	285
PPTDRAFT_01863	hypothetical protein	446.341	0.986687	0.892304	0.999638	277	367	1042	294	288	846
PPTDRAFT_01864	Phosphoglycerol transferase MdoB	915.76	0.911663	0.25847	0.999638	740	870	1625	761	529	1375
PPTDRAFT_01865	putative N6-adenine-specific DNA methylase	247.502	0.898215	0.365325	0.999638	200	197	546	187	132	441
PPTDRAFT_01866	Predicted O-methyltransferase YrrM	254.857	0.923929	0.492607	0.999638	208	259	389	247	151	310
PPTDRAFT_01867	Predicted arabinose efflux permease, MFS family	81.8582	0.910655	0.610485	0.999638	63	68	175	82	41	120
PPTDRAFT_01868	uroporphyrinogen decarboxylase	106.396	0.957007	0.786243	0.999638	73	83	255	83	55	208
PPTDRAFT_01869	ferrochelatase	144.929	0.998019	0.989548	0.999638	109	99	333	103	91	272
PPTDRAFT_01870	oxygen-dependent protoporphyrinogen oxidase	178.785	0.97014	0.823141	0.999638	174	99	388	182	83	297
PPTDRAFT_01871	poly-gamma-glutamate synthesis protein (capsule	226.828	0.978963	0.862348	0.999638	176	165	495	240	101	389
PPTDRAFT_01872	glycerophosphoryl diester phosphodiesterase	45.4976	1.20358	0.461156	0.999638	30	22	115	48	27	81
PPTDRAFT_01873	2-keto-4-pentenoate	315.747	1.02787	0.799552	0.999638	223	227	715	277	179	568
PPTDRAFT_01874	TIGR00297 family protein	41.704	1.07884	0.771868	0.999638	36	14	116	47	17	78
PPTDRAFT_01875	transcriptional regulator, TetR family	70.6861	1.20217	0.347001	0.999638	58	38	138	77	38	132
PPTDRAFT_01876	ATP-binding cassette, subfamily F, uup	241.312	1.05848	0.636472	0.999638	172	150	582	251	106	475
PPTDRAFT_01877	Putative aminopeptidase FrvX	217.401	1.02788	0.824827	0.999638	134	147	576	163	119	458
PPTDRAFT_01878	Uncharacterized integral membrane protein	88.2628	1.04372	0.808383	0.999638	59	72	185	79	46	170
PPTDRAFT_01879	oligoendopeptidase F	1513.92	0.977128	0.749196	0.999638	983	1159	3752	1182	780	3046
PPTDRAFT_01880	hypothetical protein	151.671	1.00205	0.989114	0.999638	109	101	367	107	97	283
PPTDRAFT_01881	hypothetical protein	118.122	1.03153	0.845862	0.999638	99	65	273	134	53	200
PPTDRAFT_01882	cold shock protein (beta-ribbon, CspA family)	18822	0.933635	0.276688	0.999638	16216	18293	27892	18547	11087	23029
PPTDRAFT_01883	putative efflux protein, MATE family	61.5387	1.11076	0.611205	0.999638	56	44	92	66	37	90
PPTDRAFT_01884	tetraprenyl-beta-curcumene synthase	605.627	1.07054	0.462512	0.999638	458	348	1461	583	301	1173
PPTDRAFT_01885	6-phosphofructokinase	1107.89	1.05425	0.491444	0.999638	672	870	2556	874	649	2181
PPTDRAFT_01886	Protein of unknown function (DUF3906)	20.1873	1.07304	0.846501	0.999638	11	17	45	25	7	39
PPTDRAFT_01887	multidrug resistance protein, MATE family	136.612	0.888691	0.425373	0.999638	106	112	311	102	67	260
PPTDRAFT_01888	hypothetical protein	406.534	0.909311	0.362815	0.999638	316	353	846	334	191	761
PPTDRAFT_01889	hypothetical protein	1091.81	1.01628	0.853195	0.999638	847	1161	1362	1190	670	1235
PPTDRAFT_01890	Uncharacterized membrane-anchored protein YitT,	108.855	1.18678	0.285044	0.999638	76	87	179	115	66	182
PPTDRAFT_01891	ATP-dependent RNA helicase DeaD	2233.05	0.924792	0.302234	0.999638	1583	1660	5614	1521	1179	4570
PPTDRAFT_01892	Uncharacterized membrane protein YesL	223.378	1.15829	0.242977	0.999638	137	146	521	204	134	432
PPTDRAFT_01893	6S / SsrS RNA	39677.3	0.914747	0.24023	0.999638	27306	42246	66638	24576	31092	54134
PPTDRAFT_01894	Protein of unknown function (DUF1499)	584.775	1.05015	0.598363	0.999638	455	539	885	591	339	872
PPTDRAFT_01895	thiol peroxidase, atypical 2-Cys peroxiredoxin	2460.51	0.958272	0.565617	0.999638	1424	2725	4391	1433	1879	3892
PPTDRAFT_01896	Membrane associated serine protease, rhomboid	232.009	1.00215	0.986124	0.999638	158	208	459	220	119	402
PPTDRAFT_01897	LysR family transcriptional regulator,	473.595	0.969606	0.752633	0.999638	350	410	922	475	262	686
PPTDRAFT_01898	hypothetical protein	439.25	1.08758	0.423044	0.999638	280	328	967	447	246	745
PPTDRAFT_01899	DNA-binding transcriptional regulator, MerR	291.095	0.925886	0.490025	0.999638	208	248	649	261	144	496
PPTDRAFT_01900	hypothetical protein	4.26498	2.19895	0.3447	0.999638	5	3	0	8	2	4
PPTDRAFT_01901	ammonium transporter, Amt family	108.539	1.0656	0.727002	0.999638	119	63	128	200	27	129
PPTDRAFT_01902	CBS domain-containing protein	82.0278	1.24299	0.254529	0.999638	87	27	130	147	27	110
PPTDRAFT_01903	DNA polymerase-3 subunit epsilon	44.8309	0.994739	0.982974	0.999638	58	19	69	62	19	50
PPTDRAFT_01904	Peroxiredoxin	4.12305	0.815094	0.797722	0.999638	8	1	6	4	1	6
PPTDRAFT_01905	2-isopropylmalate synthase	422.763	0.914301	0.357158	0.999638	321	286	1104	359	186	822
PPTDRAFT_01906	DNA polymerase-4	164.415	1.00078	0.995428	0.999638	124	126	343	136	97	288
PPTDRAFT_01907	ferredoxin	3323.17	1.03306	0.670792	0.999638	2310	3405	4956	3391	2125	4197
PPTDRAFT_01908	Uncharacterized protein conserved in bacteria	169.617	0.896267	0.414817	0.999638	129	153	351	152	87	264
PPTDRAFT_01909	hypothetical protein	104.143	1.05975	0.735302	0.999638	61	88	223	102	65	158
PPTDRAFT_01910	dihydroorotate oxidase A	273.81	0.977227	0.836237	0.999638	224	192	593	262	130	491
PPTDRAFT_01911	putative GTP pyrophosphokinase	197.082	1.0782	0.554555	0.999638	138	121	477	194	89	410
PPTDRAFT_01912	hypothetical protein	115.589	0.952467	0.757067	0.999638	94	80	262	108	59	193
PPTDRAFT_01913	Thiol-disulfide isomerase or thioredoxin	325.721	0.961316	0.714131	0.999638	207	389	475	218	252	429
PPTDRAFT_01914	NOL1/NOP2/sun family putative RNA methylase	75.8831	0.960892	0.833647	0.999638	62	41	202	71	30	155
PPTDRAFT_01915	16S rRNA pseudouridine516 synthase	53.3401	1.01992	0.934917	0.999638	27	53	115	60	25	84
PPTDRAFT_01916	diguanylate cyclase (GGDEF) domain-containing	172.864	0.957893	0.745084	0.999638	134	144	346	160	91	282
PPTDRAFT_01917	Glycosyltransferase involved in cell wall	172.157	1.02928	0.835413	0.999638	111	135	389	173	87	301
PPTDRAFT_01918	Uncharacterized membrane protein YkvI	7.3042	0.722592	0.569938	0.999638	7	8	13	6	3	10
PPTDRAFT_01919	membrane protein DedA, SNARE-associated domain	31.9009	0.960088	0.892788	0.999638	33	23	53	25	12	74
PPTDRAFT_01920	hypothetical protein	3.77566	0.453439	0.358661	0.999638	4	1	19	1	1	7
PPTDRAFT_01921	xanthine phosphoribosyltransferase	278.978	1.0165	0.884273	0.999638	188	247	538	207	192	463
PPTDRAFT_01922	hypothetical protein	3248.71	1.01332	0.85592	0.999638	1688	3867	5457	2145	2379	5105
PPTDRAFT_01923	hypothetical protein	44.6446	1.21477	0.439268	0.999638	20	24	137	38	23	106
PPTDRAFT_01924	alkylhydroperoxidase AhpD family core	106.06	0.984624	0.926866	0.999638	65	109	205	77	59	206
PPTDRAFT_01925	hypothetical protein	84.3801	0.958374	0.826421	0.999638	63	60	196	47	54	175
PPTDRAFT_01926	tRNA_Leu_CAG	366.575	1.25691	0.0671419	0.999638	208	317	519	220	385	550
PPTDRAFT_01927	peptide-methionine (S)-S-oxide reductase	302.768	0.959391	0.700259	0.999638	215	255	653	257	164	527
PPTDRAFT_01928	hypothetical protein	15.9619	1.22222	0.607771	0.999638	9	14	28	12	11	33
PPTDRAFT_01929	N-acetylmuramoyl-L-alanine amidase	0.400956	1.11981	0.966121	NA	0	1	0	1	0	0
PPTDRAFT_01930	YqzE-like protein	8.82088	1.06787	0.900727	0.999638	6	7	16	13	4	11
PPTDRAFT_01931	hypothetical protein	6.11658	1.48747	0.55327	0.999638	3	1	22	6	4	12
PPTDRAFT_01932	protein YqhG of unknown function	1.98634	0.702091	0.76314	0.999638	3	0	7	1	0	6
PPTDRAFT_01933	Superfamily II DNA/RNA helicases, SNF2 family	9.6685	0.698376	0.492091	0.999638	11	5	27	4	5	18
PPTDRAFT_01934	Helix-turn-helix domain-containing protein	19.6934	0.900397	0.770897	0.999638	10	19	52	17	10	32
PPTDRAFT_01935	3-oxoacyl-[acyl-carrier-protein] synthase II	443.313	1.17232	0.0970713	0.999638	332	265	912	489	209	888
PPTDRAFT_01936	Ribosomal protein S18 acetylase RimI	45.7924	1.20821	0.445832	0.999638	32	23	102	67	15	89
PPTDRAFT_01937	Predicted DNA-binding transcriptional regulator	47.0854	0.806274	0.358786	0.999638	34	38	130	34	21	87
PPTDRAFT_01938	Predicted transcriptional regulator YdeE,	14.4724	0.87774	0.755587	0.999638	11	11	35	17	4	26
PPTDRAFT_01939	Predicted arabinose efflux permease, MFS family	0.959024	0.44893	0.599432	0.999638	1	1	3	1	0	1
PPTDRAFT_01940	transcriptional regulator, TetR family	10.3687	1.26862	0.629871	0.999638	3	10	23	9	8	17
PPTDRAFT_01941	hypothetical protein	22.1721	1.09491	0.787633	0.999638	19	16	35	31	9	33
PPTDRAFT_01942	O-acetyl-ADP-ribose deacetylase (regulator of	28.7981	0.944949	0.851331	0.999638	20	21	70	27	18	39
PPTDRAFT_01943	ADP-ribose pyrophosphatase	31.0465	1.46612	0.190611	0.999638	20	13	67	31	20	69
PPTDRAFT_01944	aminotransferase	20.0499	1.38387	0.38416	0.999638	6	12	60	19	12	44
PPTDRAFT_01945	Regulation of enolase protein 1 , concanavalin	111.769	0.988453	0.947447	0.999638	84	72	263	130	30	244
PPTDRAFT_01946	Uncharacterized membrane protein	85.3287	0.947059	0.760946	0.999638	63	65	199	67	43	167
PPTDRAFT_01947	Predicted transcriptional regulator	4.00125	1.33272	0.713272	0.999638	1	4	9	3	2	11
PPTDRAFT_01948	multiple sugar transport system	27.3027	0.894912	0.722459	0.999638	14	27	70	25	14	41
PPTDRAFT_01949	multiple sugar transport system permease protein	5.48383	0.601186	0.46933	0.999638	2	7	18	1	2	14
PPTDRAFT_01950	carbohydrate ABC transporter membrane protein 2,	4.11406	0.575386	0.48024	0.999638	2	6	12	2	1	8
PPTDRAFT_01951	arabinan endo-1,5-alpha-L-arabinosidase	3.96087	0.461757	0.363907	0.999638	4	2	13	7	0	3
PPTDRAFT_01952	Beta-xylosidase, GH43 family	18.9146	0.760003	0.447062	0.999638	17	19	37	17	8	26
PPTDRAFT_01953	Methylase involved in ubiquinone/menaquinone	349.958	1.0323	0.762319	0.999638	250	209	896	343	143	740
PPTDRAFT_01954	GrpB domain, predicted nucleotidyltransferase,	30.5116	1.36359	0.302998	0.999638	29	9	61	33	15	68
PPTDRAFT_01955	hypothetical protein	29.9075	1.47364	0.187434	0.999638	15	27	40	35	20	52
PPTDRAFT_01956	PhnB protein	645.902	0.986791	0.880007	0.999638	500	664	925	612	411	821
PPTDRAFT_01957	DNA-binding transcriptional regulator, MarR	172.064	0.93387	0.606167	0.999638	129	176	288	146	107	238
PPTDRAFT_01958	MFS transporter, DHA1 family, tetracycline	35.5142	0.888846	0.66026	0.999638	26	36	62	31	25	38
PPTDRAFT_01959	ribonucleoside-diphosphate reductase beta chain	661.045	0.953031	0.588916	0.999638	506	546	1362	512	374	1187
PPTDRAFT_01960	ribonucleoside-diphosphate reductase class Ib	1407.13	1.00418	0.957434	0.999638	1056	913	3409	1158	724	2810
PPTDRAFT_01961	protein involved in ribonucleotide reduction	456.756	0.982308	0.860864	0.999638	401	357	818	465	205	797
PPTDRAFT_01962	Protein of unknown function (DUF2500)	21.0756	1.22551	0.574497	0.999638	8	26	32	24	12	32
PPTDRAFT_01963	Protein N-acetyltransferase, RimJ/RimL family	20.5834	1.07203	0.843526	0.999638	19	8	51	21	8	44
PPTDRAFT_01964	Predicted arabinose efflux permease, MFS family	86.9683	1.10639	0.583285	0.999638	47	69	203	85	45	168
PPTDRAFT_01965	putative aldouronate transport system	7.57437	1.94884	0.240015	0.999638	5	3	10	11	5	15
PPTDRAFT_01966	transcriptional regulator, LacI family	93.7052	1.20009	0.287508	0.999638	71	55	186	105	48	178
PPTDRAFT_01967	beta-mannosidase	23.1495	1.06963	0.843676	0.999638	13	18	55	24	7	57
PPTDRAFT_01968	Uncharacterized membrane protein	60.2522	0.853021	0.466188	0.999638	53	40	145	65	29	76
PPTDRAFT_01969	conserved hypothetical protein	12.611	0.984787	0.972188	0.999638	9	8	33	10	6	27
PPTDRAFT_01970	putative membrane protein	60.6259	1.1384	0.536298	0.999638	48	37	121	69	25	124
PPTDRAFT_01971	Glycosyltransferase involved in cell wall	7.38958	0.732238	0.608415	0.999638	11	5	11	4	2	17
PPTDRAFT_01972	Uncharacterized membrane protein YgaE,	244.993	0.959028	0.718661	0.999638	171	228	472	195	161	366
PPTDRAFT_01973	DNA helicase-2 / ATP-dependent DNA helicase PcrA	42.7289	0.992303	0.975448	0.999638	28	24	125	40	13	105
PPTDRAFT_01974	Adenine deaminase (EC 3.5.4.2)	99.0211	1.16402	0.367861	0.999638	92	48	186	127	43	172
PPTDRAFT_01975	cAMP-binding domain of CRP or a regulatory	7.82732	1.6795	0.351134	0.999638	5	4	12	10	4	19
PPTDRAFT_01976	Darcynin, protein of unknown function	63.5296	1.1424	0.528945	0.999638	54	42	97	74	46	71
PPTDRAFT_01977	Copper amine oxidase N-terminal	351.77	0.912425	0.389435	0.999638	245	385	614	276	210	527
PPTDRAFT_01978	carbohydrate ABC transporter substrate-binding	393.135	1.04289	0.670763	0.999638	280	314	786	365	222	681
PPTDRAFT_01979	methyl-accepting chemotaxis sensory transducer	663.288	0.953509	0.588657	0.999638	415	688	1278	524	412	1032
PPTDRAFT_01980	MFS transporter, OHS family, lactose permease	3.45215	1.33643	0.729835	0.999638	1	2	11	3	2	8
PPTDRAFT_01981	branched-chain amino acid:cation transporter,	572.114	0.974452	0.785827	0.999638	342	699	870	439	397	776
PPTDRAFT_01982	AraC-type DNA-binding protein	26.1253	0.878259	0.679178	0.999638	17	31	48	20	13	44
PPTDRAFT_01983	alpha-D-xyloside xylohydrolase	8.12538	1.21155	0.722058	0.999638	7	5	13	9	5	13
PPTDRAFT_01984	CubicO group peptidase, beta-lactamase class C	141.309	1.03014	0.836803	0.999638	85	122	309	114	85	257
PPTDRAFT_01985	methyl-accepting chemotaxis protein	120.435	0.883017	0.429405	0.999638	69	143	235	89	75	171
PPTDRAFT_01986	MFS transporter, ACDE family, multidrug	28.8575	0.725167	0.280835	0.999638	21	24	86	20	14	44
PPTDRAFT_01987	Predicted arabinose efflux permease, MFS family	28.1429	0.706612	0.256692	0.999638	28	25	62	25	8	47
PPTDRAFT_01988	DNA-binding transcriptional regulator, MarR	31.7579	0.699139	0.259752	0.999638	51	15	36	59	2	26
PPTDRAFT_01989	transaldolase (EC 2.2.1.2)	1301	1.087	0.294922	0.999638	781	928	3145	994	801	2610
PPTDRAFT_01990	CBS-domain-containing membrane protein	16.1791	0.950359	0.89585	0.999638	14	11	34	19	7	24
PPTDRAFT_01991	TraX protein	16.6171	1.17211	0.6887	0.999638	16	8	27	18	13	19
PPTDRAFT_01992	biofilm PGA synthesis lipoprotein PgaB	525.668	0.907646	0.29172	0.999638	330	491	1227	386	290	935
PPTDRAFT_01993	amino acid adenylation domain-containing	744.644	1.02308	0.798171	0.999638	476	500	1958	599	406	1472
PPTDRAFT_01994	methyl-accepting chemotaxis protein	1582.04	0.945335	0.446603	0.999638	1065	1494	3201	1120	995	2704
PPTDRAFT_01995	Acetyltransferases	65.6359	0.989944	0.959959	0.999638	52	55	123	59	34	116
PPTDRAFT_01996	ribose-5-phosphate isomerase	59.8728	1.04501	0.834516	0.999638	54	36	119	68	23	114
PPTDRAFT_01997	Glycopeptide antibiotics resistance protein	20.6272	0.914806	0.796815	0.999638	17	16	45	18	9	39
PPTDRAFT_01998	MarR family transcriptional regulator, 2-MHQ and	560.076	1.01765	0.854291	0.999638	413	600	756	554	356	700
PPTDRAFT_01999	methylmalonyl-CoA mutase C-terminal	242.372	1.14439	0.245204	0.999638	161	193	448	221	155	429
PPTDRAFT_02000	Signal transduction histidine kinase	126.874	0.999558	0.997734	0.999638	83	88	326	118	49	280
PPTDRAFT_02001	Predicted arabinose efflux permease, MFS family	131.55	1.03266	0.828251	0.999638	114	88	255	136	68	217
PPTDRAFT_02002	hypothetical protein	49.6106	1.05755	0.807658	0.999638	42	29	107	47	26	92
PPTDRAFT_02003	N-acetylglutamate synthase and related	44.6024	1.25795	0.351772	0.999638	33	20	99	59	20	83
PPTDRAFT_02004	Lysophospholipase L1	295.878	1.06948	0.538138	0.999638	171	241	665	211	189	592
PPTDRAFT_02005	Tetratricopeptide repeat-containing protein	157.616	0.835343	0.213272	0.999638	106	196	271	95	99	237
PPTDRAFT_02006	hypothetical protein	3.11838	0.638534	0.614977	0.999638	3	3	7	1	1	8
PPTDRAFT_02007	hypothetical protein	51.959	0.796702	0.328726	0.999638	46	60	80	33	30	75
PPTDRAFT_02008	Protein N-acetyltransferase, RimJ/RimL family	46.9012	0.88805	0.612816	0.999638	28	50	101	34	28	74
PPTDRAFT_02009	Cell wall-associated hydrolases	1.03945	0.30747	0.485784	0.999638	0	2	3	2	0	0
[truncated: 3,537 more rows]
